# Supplementary material
Source: publisher site journal article supplement (https://www.spandidos-publications.com/7601/downloadSupplementary)
Supplement: Supplementary file 1 [file downloadSupplementary]

## Sheet: Sheet1
Table SI. Manganese metabolism-related genes.
Gene Symbol	Description	Category	Uniprot ID	Gifts	GC ID	Relevance score	GeneCards Link
TP53	Tumor Protein P53	Protein Coding	P04637	66	GC17M007661	103.824	https://www.genecards.org/cgi-bin/carddisp.pl?gene=TP53
APOE	Apolipoprotein E	Protein Coding	P02649	63	GC19P123244	101.705	https://www.genecards.org/cgi-bin/carddisp.pl?gene=APOE
RYR1	Ryanodine Receptor 1	Protein Coding	P21817	61	GC19P122999	92.7427	https://www.genecards.org/cgi-bin/carddisp.pl?gene=RYR1
INS	Insulin	Protein Coding	P01308	60	GC11M002159	86.6668	https://www.genecards.org/cgi-bin/carddisp.pl?gene=INS
TNF	Tumor Necrosis Factor	Protein Coding	P01375	65	GC06P144764	86.3458	https://www.genecards.org/cgi-bin/carddisp.pl?gene=TNF
MTHFR	Methylenetetrahydrofolate Reductase	Protein Coding	P42898	61	GC01M011785	83.2483	https://www.genecards.org/cgi-bin/carddisp.pl?gene=MTHFR
CBS	Cystathionine Beta-Synthase	Protein Coding	P35520	64	GC21M043053	82.4636	https://www.genecards.org/cgi-bin/carddisp.pl?gene=CBS
APOB	Apolipoprotein B	Protein Coding	P04114	59	GC02M020956	82.0344	https://www.genecards.org/cgi-bin/carddisp.pl?gene=APOB
PPARG	Peroxisome Proliferator Activated Receptor Gamma	Protein Coding	P37231	66	GC03P012287	81.2159	https://www.genecards.org/cgi-bin/carddisp.pl?gene=PPARG
MTR	5-Methyltetrahydrofolate-Homocysteine Methyltransferase	Protein Coding	Q99707	60	GC01P236795	81.155	https://www.genecards.org/cgi-bin/carddisp.pl?gene=MTR
IL6	Interleukin 6	Protein Coding	P05231	64	GC07P022725	77.8794	https://www.genecards.org/cgi-bin/carddisp.pl?gene=IL6
DICER1	Dicer 1, Ribonuclease III	Protein Coding	Q9UPY3	61	GC14M095086	77.0825	https://www.genecards.org/cgi-bin/carddisp.pl?gene=DICER1
EGFR	Epidermal Growth Factor Receptor	Protein Coding	P00533	68	GC07P055019	76.5637	https://www.genecards.org/cgi-bin/carddisp.pl?gene=EGFR
SOD2	Superoxide Dismutase 2	Protein Coding	P04179	60	GC06M159669	76.3865	https://www.genecards.org/cgi-bin/carddisp.pl?gene=SOD2
CFTR	CF Transmembrane Conductance Regulator	Protein Coding	P13569	66	GC07P117287	76.0499	https://www.genecards.org/cgi-bin/carddisp.pl?gene=CFTR
CYP2D6	Cytochrome P450 Family 2 Subfamily D Member 6	Protein Coding	P10635	60	GC22M042126	74.384	https://www.genecards.org/cgi-bin/carddisp.pl?gene=CYP2D6
PIK3CA	Phosphatidylinositol-4,5-Bisphosphate 3-Kinase Catalytic Subunit Alpha	Protein Coding	P42336	66	GC03P179148	71.7321	https://www.genecards.org/cgi-bin/carddisp.pl?gene=PIK3CA
CYP3A4	Cytochrome P450 Family 3 Subfamily A Member 4	Protein Coding	P08684	61	GC07M105725	70.1838	https://www.genecards.org/cgi-bin/carddisp.pl?gene=CYP3A4
LDLR	Low Density Lipoprotein Receptor	Protein Coding	P01130	64	GC19P122311	69.7889	https://www.genecards.org/cgi-bin/carddisp.pl?gene=LDLR
LMNA	Lamin A/C	Protein Coding	P02545	62	GC01P156082	69.7683	https://www.genecards.org/cgi-bin/carddisp.pl?gene=LMNA
SOD1	Superoxide Dismutase 1	Protein Coding	P00441	66	GC21P031659	69.6014	https://www.genecards.org/cgi-bin/carddisp.pl?gene=SOD1
ATM	ATM Serine/Threonine Kinase	Protein Coding	Q13315	66	GC11P108223	69.3249	https://www.genecards.org/cgi-bin/carddisp.pl?gene=ATM
ACE	Angiotensin I Converting Enzyme	Protein Coding	P12821	64	GC17P063477	68.9333	https://www.genecards.org/cgi-bin/carddisp.pl?gene=ACE
PTEN	Phosphatase And Tensin Homolog	Protein Coding	P60484	65	GC10P112611	68.8789	https://www.genecards.org/cgi-bin/carddisp.pl?gene=PTEN
BRCA1	BRCA1 DNA Repair Associated	Protein Coding	P38398	63	GC17M043044	66.7001	https://www.genecards.org/cgi-bin/carddisp.pl?gene=BRCA1
TGFB1	Transforming Growth Factor Beta 1	Protein Coding	P01137	66	GC19M041301	66.6785	https://www.genecards.org/cgi-bin/carddisp.pl?gene=TGFB1
LPL	Lipoprotein Lipase	Protein Coding	P06858	63	GC08P019901	66.5278	https://www.genecards.org/cgi-bin/carddisp.pl?gene=LPL
POLG	DNA Polymerase Gamma, Catalytic Subunit	Protein Coding	P54098	60	GC15M152330	65.813	https://www.genecards.org/cgi-bin/carddisp.pl?gene=POLG
MTOR	Mechanistic Target Of Rapamycin Kinase	Protein Coding	P42345	68	GC01M011106	64.4632	https://www.genecards.org/cgi-bin/carddisp.pl?gene=MTOR
AKT1	AKT Serine/Threonine Kinase 1	Protein Coding	P31749	66	GC14M104769	63.7433	https://www.genecards.org/cgi-bin/carddisp.pl?gene=AKT1
APP	Amyloid Beta Precursor Protein	Protein Coding	P05067	63	GC21M025880	63.3327	https://www.genecards.org/cgi-bin/carddisp.pl?gene=APP
CFH	Complement Factor H	Protein Coding	P08603	60	GC01P196621	63.2477	https://www.genecards.org/cgi-bin/carddisp.pl?gene=CFH
ESR1	Estrogen Receptor 1	Protein Coding	P03372	67	GC06P151656	62.8952	https://www.genecards.org/cgi-bin/carddisp.pl?gene=ESR1
LINC01672	Long Intergenic Non-Protein Coding RNA 1672	RNA Gene		21	GC01P050860	62.817	https://www.genecards.org/cgi-bin/carddisp.pl?gene=LINC01672
CALCA	Calcitonin Related Polypeptide Alpha	Protein Coding	P06881	56	GC11M014966	62.689	https://www.genecards.org/cgi-bin/carddisp.pl?gene=CALCA
BDNF-AS	BDNF Antisense RNA	RNA Gene		31	GC11P027466	62.5393	https://www.genecards.org/cgi-bin/carddisp.pl?gene=BDNF-AS
GRN	Granulin Precursor	Protein Coding	P28799	60	GC17P044345	62.379	https://www.genecards.org/cgi-bin/carddisp.pl?gene=GRN
AR	Androgen Receptor	Protein Coding	P10275	64	GC0XP067544	61.6555	https://www.genecards.org/cgi-bin/carddisp.pl?gene=AR
SLC2A1	Solute Carrier Family 2 Member 1	Protein Coding	P11166	66	GC01M042925	61.4021	https://www.genecards.org/cgi-bin/carddisp.pl?gene=SLC2A1
COMT	Catechol-O-Methyltransferase	Protein Coding	P21964	64	GC22P019941	61.2594	https://www.genecards.org/cgi-bin/carddisp.pl?gene=COMT
APOA1	Apolipoprotein A1	Protein Coding	P02647	63	GC11M116835	61.0357	https://www.genecards.org/cgi-bin/carddisp.pl?gene=APOA1
ADIPOQ	Adiponectin, C1Q And Collagen Domain Containing	Protein Coding	Q15848	59	GC03P186842	60.8489	https://www.genecards.org/cgi-bin/carddisp.pl?gene=ADIPOQ
IL10	Interleukin 10	Protein Coding	P22301	60	GC01M206767	60.4143	https://www.genecards.org/cgi-bin/carddisp.pl?gene=IL10
LEP	Leptin	Protein Coding	P41159	59	GC07P128241	60.3576	https://www.genecards.org/cgi-bin/carddisp.pl?gene=LEP
MYC	MYC Proto-Oncogene, BHLH Transcription Factor	Protein Coding	P01106	66	GC08P127735	59.8386	https://www.genecards.org/cgi-bin/carddisp.pl?gene=MYC
NF1	Neurofibromin 1	Protein Coding	P21359	60	GC17P031094	59.7495	https://www.genecards.org/cgi-bin/carddisp.pl?gene=NF1
IGF1	Insulin Like Growth Factor 1	Protein Coding	P05019	61	GC12M102395	59.5151	https://www.genecards.org/cgi-bin/carddisp.pl?gene=IGF1
H19	H19 Imprinted Maternally Expressed Transcript	RNA Gene		36	GC11M001995	58.8305	https://www.genecards.org/cgi-bin/carddisp.pl?gene=H19
HRAS	HRas Proto-Oncogene, GTPase	Protein Coding	P01112	65	GC11M012501	58.4615	https://www.genecards.org/cgi-bin/carddisp.pl?gene=HRAS
LRP1	LDL Receptor Related Protein 1	Protein Coding	Q07954	61	GC12P057128	57.9979	https://www.genecards.org/cgi-bin/carddisp.pl?gene=LRP1
IL1B	Interleukin 1 Beta	Protein Coding	P01584	60	GC02M112829	57.6263	https://www.genecards.org/cgi-bin/carddisp.pl?gene=IL1B
SLC30A10	Solute Carrier Family 30 Member 10	Protein Coding	Q6XR72	55	GC01M219685	57.2345	https://www.genecards.org/cgi-bin/carddisp.pl?gene=SLC30A10
HFE	Homeostatic Iron Regulator	Protein Coding	Q30201	58	GC06P026087	57.0053	https://www.genecards.org/cgi-bin/carddisp.pl?gene=HFE
NFE2L2	NFE2 Like BZIP Transcription Factor 2	Protein Coding	Q16236	64	GC02M177227	56.6915	https://www.genecards.org/cgi-bin/carddisp.pl?gene=NFE2L2
TERT	Telomerase Reverse Transcriptase	Protein Coding	O14746	64	GC05M001253	56.5936	https://www.genecards.org/cgi-bin/carddisp.pl?gene=TERT
C3	Complement C3	Protein Coding	P01024	62	GC19M006677	56.5518	https://www.genecards.org/cgi-bin/carddisp.pl?gene=C3
ATP7B	ATPase Copper Transporting Beta	Protein Coding	P35670	61	GC13M051930	56.4765	https://www.genecards.org/cgi-bin/carddisp.pl?gene=ATP7B
TH	Tyrosine Hydroxylase	Protein Coding	P07101	63	GC11M002163	56.4642	https://www.genecards.org/cgi-bin/carddisp.pl?gene=TH
STAT3	Signal Transducer And Activator Of Transcription 3	Protein Coding	P40763	67	GC17M042313	56.2237	https://www.genecards.org/cgi-bin/carddisp.pl?gene=STAT3
CYP1A1	Cytochrome P450 Family 1 Subfamily A Member 1	Protein Coding	P04798	60	GC15M074719	55.579	https://www.genecards.org/cgi-bin/carddisp.pl?gene=CYP1A1
CYP1A2	Cytochrome P450 Family 1 Subfamily A Member 2	Protein Coding	P05177	59	GC15P074748	55.3507	https://www.genecards.org/cgi-bin/carddisp.pl?gene=CYP1A2
HIF1A	Hypoxia Inducible Factor 1 Subunit Alpha	Protein Coding	Q16665	62	GC14P061695	54.5328	https://www.genecards.org/cgi-bin/carddisp.pl?gene=HIF1A
BDNF	Brain Derived Neurotrophic Factor	Protein Coding	P23560	63	GC11M027654	54.4814	https://www.genecards.org/cgi-bin/carddisp.pl?gene=BDNF
ABCA4	ATP Binding Cassette Subfamily A Member 4	Protein Coding	P78363	57	GC01M093992	54.4746	https://www.genecards.org/cgi-bin/carddisp.pl?gene=ABCA4
CRP	C-Reactive Protein	Protein Coding	P02741	59	GC01M164127	54.3829	https://www.genecards.org/cgi-bin/carddisp.pl?gene=CRP
NPC1	NPC Intracellular Cholesterol Transporter 1	Protein Coding	O15118	62	GC18M023506	54.3337	https://www.genecards.org/cgi-bin/carddisp.pl?gene=NPC1
GBA1	Glucosylceramidase Beta 1	Protein Coding	P04062	63	GC01M163977	54.0029	https://www.genecards.org/cgi-bin/carddisp.pl?gene=GBA1
IFNG	Interferon Gamma	Protein Coding	P01579	63	GC12M068154	53.6464	https://www.genecards.org/cgi-bin/carddisp.pl?gene=IFNG
TTR	Transthyretin	Protein Coding	P02766	61	GC18P031557	53.4899	https://www.genecards.org/cgi-bin/carddisp.pl?gene=TTR
TMX2-CTNND1	TMX2-CTNND1 Readthrough (NMD Candidate)	RNA Gene		25	GC11P057712	53.4866	https://www.genecards.org/cgi-bin/carddisp.pl?gene=TMX2-CTNND1
HPRT1	Hypoxanthine Phosphoribosyltransferase 1	Protein Coding	P00492	61	GC0XP134460	53.0028	https://www.genecards.org/cgi-bin/carddisp.pl?gene=HPRT1
BCL2	BCL2 Apoptosis Regulator	Protein Coding	P10415	64	GC18M063123	52.7265	https://www.genecards.org/cgi-bin/carddisp.pl?gene=BCL2
SOD2-OT1	SOD2 Overlapping Transcript 1	RNA Gene		21	GC06M159772	52.3936	https://www.genecards.org/cgi-bin/carddisp.pl?gene=SOD2-OT1
CYP1B1	Cytochrome P450 Family 1 Subfamily B Member 1	Protein Coding	Q16678	60	GC02M038066	52.3526	https://www.genecards.org/cgi-bin/carddisp.pl?gene=CYP1B1
CPT2	Carnitine Palmitoyltransferase 2	Protein Coding	P23786	63	GC01P053196	52.3485	https://www.genecards.org/cgi-bin/carddisp.pl?gene=CPT2
CDH1	Cadherin 1	Protein Coding	P12830	62	GC16P068737	52.2583	https://www.genecards.org/cgi-bin/carddisp.pl?gene=CDH1
GSTM1	Glutathione S-Transferase Mu 1	Protein Coding	P09488	55	GC01P109687	52.2036	https://www.genecards.org/cgi-bin/carddisp.pl?gene=GSTM1
INSR	Insulin Receptor	Protein Coding	P06213	67	GC19M007112	52.1685	https://www.genecards.org/cgi-bin/carddisp.pl?gene=INSR
GAA	Alpha Glucosidase	Protein Coding	P10253	64	GC17P080101	52.1625	https://www.genecards.org/cgi-bin/carddisp.pl?gene=GAA
VEGFA	Vascular Endothelial Growth Factor A	Protein Coding	P15692	61	GC06P043770	52.0541	https://www.genecards.org/cgi-bin/carddisp.pl?gene=VEGFA
GLA	Galactosidase Alpha	Protein Coding	P06280	63	GC0XM101393	51.9329	https://www.genecards.org/cgi-bin/carddisp.pl?gene=GLA
CYP2C9	Cytochrome P450 Family 2 Subfamily C Member 9	Protein Coding	P11712	59	GC10P094938	51.9147	https://www.genecards.org/cgi-bin/carddisp.pl?gene=CYP2C9
UGT1A1	UDP Glucuronosyltransferase Family 1 Member A1	Protein Coding	P22309	63	GC02P233760	51.8713	https://www.genecards.org/cgi-bin/carddisp.pl?gene=UGT1A1
ABCA1	ATP Binding Cassette Subfamily A Member 1	Protein Coding	O95477	62	GC09M104781	51.7397	https://www.genecards.org/cgi-bin/carddisp.pl?gene=ABCA1
MAPT	Microtubule Associated Protein Tau	Protein Coding	P10636	63	GC17P045894	51.7093	https://www.genecards.org/cgi-bin/carddisp.pl?gene=MAPT
NOS3	Nitric Oxide Synthase 3	Protein Coding	P29474	63	GC07P159858	51.493	https://www.genecards.org/cgi-bin/carddisp.pl?gene=NOS3
CAT	Catalase	Protein Coding	P04040	64	GC11P034460	51.4484	https://www.genecards.org/cgi-bin/carddisp.pl?gene=CAT
SLC39A14	Solute Carrier Family 39 Member 14	Protein Coding	Q15043	56	GC08P022367	51.4025	https://www.genecards.org/cgi-bin/carddisp.pl?gene=SLC39A14
CYP27A1	Cytochrome P450 Family 27 Subfamily A Member 1	Protein Coding	Q02318	59	GC02P218781	51.3406	https://www.genecards.org/cgi-bin/carddisp.pl?gene=CYP27A1
ALB	Albumin	Protein Coding	P02768	62	GC04P073397	51.2617	https://www.genecards.org/cgi-bin/carddisp.pl?gene=ALB
SLC6A3	Solute Carrier Family 6 Member 3	Protein Coding	Q01959	64	GC05M001392	51.2028	https://www.genecards.org/cgi-bin/carddisp.pl?gene=SLC6A3
ABCD1	ATP Binding Cassette Subfamily D Member 1	Protein Coding	P33897	59	GC0XP153724	51.1205	https://www.genecards.org/cgi-bin/carddisp.pl?gene=ABCD1
OTC	Ornithine Transcarbamylase	Protein Coding	P00480	59	GC0XP038340	50.6314	https://www.genecards.org/cgi-bin/carddisp.pl?gene=OTC
MEG3	Maternally Expressed 3	RNA Gene		37	GC14P117888	50.6113	https://www.genecards.org/cgi-bin/carddisp.pl?gene=MEG3
CETP	Cholesteryl Ester Transfer Protein	Protein Coding	P11597	59	GC16P056961	50.3627	https://www.genecards.org/cgi-bin/carddisp.pl?gene=CETP
ABCB1	ATP Binding Cassette Subfamily B Member 1	Protein Coding	P08183	64	GC07M087504	50.3271	https://www.genecards.org/cgi-bin/carddisp.pl?gene=ABCB1
SLC22A5	Solute Carrier Family 22 Member 5	Protein Coding	O76082	59	GC05P132369	50.2063	https://www.genecards.org/cgi-bin/carddisp.pl?gene=SLC22A5
CREBBP	CREB Binding Protein	Protein Coding	Q92793	67	GC16M025750	49.7152	https://www.genecards.org/cgi-bin/carddisp.pl?gene=CREBBP
WFS1	Wolframin ER Transmembrane Glycoprotein	Protein Coding	O76024	58	GC04P006269	49.533	https://www.genecards.org/cgi-bin/carddisp.pl?gene=WFS1
MAOA	Monoamine Oxidase A	Protein Coding	P21397	62	GC0XP043654	49.4436	https://www.genecards.org/cgi-bin/carddisp.pl?gene=MAOA
NFKB1	Nuclear Factor Kappa B Subunit 1	Protein Coding	P19838	66	GC04P102501	49.27	https://www.genecards.org/cgi-bin/carddisp.pl?gene=NFKB1
PPARA	Peroxisome Proliferator Activated Receptor Alpha	Protein Coding	Q07869	58	GC22P046150	49.0111	https://www.genecards.org/cgi-bin/carddisp.pl?gene=PPARA
SLC6A4	Solute Carrier Family 6 Member 4	Protein Coding	P31645	61	GC17M030194	48.4105	https://www.genecards.org/cgi-bin/carddisp.pl?gene=SLC6A4
EGF	Epidermal Growth Factor	Protein Coding	P01133	64	GC04P109912	48.2055	https://www.genecards.org/cgi-bin/carddisp.pl?gene=EGF
ERCC2	ERCC Excision Repair 2, TFIIH Core Complex Helicase Subunit	Protein Coding	P18074	61	GC19M045349	47.9656	https://www.genecards.org/cgi-bin/carddisp.pl?gene=ERCC2
DNMT1	DNA Methyltransferase 1	Protein Coding	P26358	66	GC19M010133	47.8688	https://www.genecards.org/cgi-bin/carddisp.pl?gene=DNMT1
PPARGC1A	PPARG Coactivator 1 Alpha	Protein Coding	Q9UBK2	60	GC04M023755	47.8342	https://www.genecards.org/cgi-bin/carddisp.pl?gene=PPARGC1A
ARG1	Arginase 1	Protein Coding	P05089	62	GC06P146254	47.7403	https://www.genecards.org/cgi-bin/carddisp.pl?gene=ARG1
ALPL	Alkaline Phosphatase, Biomineralization Associated	Protein Coding	P05186	63	GC01P021508	47.737	https://www.genecards.org/cgi-bin/carddisp.pl?gene=ALPL
CP	Ceruloplasmin	Protein Coding	P00450	61	GC03M149162	47.663	https://www.genecards.org/cgi-bin/carddisp.pl?gene=CP
NOTCH1	Notch Receptor 1	Protein Coding	P46531	66	GC09M138850	47.2874	https://www.genecards.org/cgi-bin/carddisp.pl?gene=NOTCH1
G6PD	Glucose-6-Phosphate Dehydrogenase	Protein Coding	P11413	63	GC0XM154605	47.1814	https://www.genecards.org/cgi-bin/carddisp.pl?gene=G6PD
PSAP	Prosaposin	Protein Coding	P07602	61	GC10M071816	47.0251	https://www.genecards.org/cgi-bin/carddisp.pl?gene=PSAP
GCH1	GTP Cyclohydrolase 1	Protein Coding	P30793	59	GC14M054842	46.7553	https://www.genecards.org/cgi-bin/carddisp.pl?gene=GCH1
PAH	Phenylalanine Hydroxylase	Protein Coding	P00439	60	GC12M102836	46.6142	https://www.genecards.org/cgi-bin/carddisp.pl?gene=PAH
SNCA	Synuclein Alpha	Protein Coding	P37840	64	GC04M089724	46.5888	https://www.genecards.org/cgi-bin/carddisp.pl?gene=SNCA
FH	Fumarate Hydratase	Protein Coding	P07954	59	GC01M241499	46.5451	https://www.genecards.org/cgi-bin/carddisp.pl?gene=FH
GSTP1	Glutathione S-Transferase Pi 1	Protein Coding	P09211	63	GC11P067583	46.5424	https://www.genecards.org/cgi-bin/carddisp.pl?gene=GSTP1
GATA1	GATA Binding Protein 1	Protein Coding	P15976	60	GC0XP048786	46.492	https://www.genecards.org/cgi-bin/carddisp.pl?gene=GATA1
CCND1	Cyclin D1	Protein Coding	P24385	66	GC11P069641	46.4507	https://www.genecards.org/cgi-bin/carddisp.pl?gene=CCND1
ADA	Adenosine Deaminase	Protein Coding	P00813	64	GC20M044620	46.3912	https://www.genecards.org/cgi-bin/carddisp.pl?gene=ADA
ERBB2	Erb-B2 Receptor Tyrosine Kinase 2	Protein Coding	P04626	68	GC17P039687	46.3318	https://www.genecards.org/cgi-bin/carddisp.pl?gene=ERBB2
MMAB	Metabolism Of Cobalamin Associated B	Protein Coding	Q96EY8	56	GC12M109553	46.2638	https://www.genecards.org/cgi-bin/carddisp.pl?gene=MMAB
LIPC	Lipase C, Hepatic Type	Protein Coding	P11150	59	GC15P058410	46.1714	https://www.genecards.org/cgi-bin/carddisp.pl?gene=LIPC
CYP17A1	Cytochrome P450 Family 17 Subfamily A Member 1	Protein Coding	P05093	62	GC10M102830	46.1608	https://www.genecards.org/cgi-bin/carddisp.pl?gene=CYP17A1
SDHB	Succinate Dehydrogenase Complex Iron Sulfur Subunit B	Protein Coding	P21912	62	GC01M019397	46.0912	https://www.genecards.org/cgi-bin/carddisp.pl?gene=SDHB
SFTPB	Surfactant Protein B	Protein Coding	P07988	56	GC02M085657	46.0505	https://www.genecards.org/cgi-bin/carddisp.pl?gene=SFTPB
PON1	Paraoxonase 1	Protein Coding	P27169	60	GC07M095297	45.9479	https://www.genecards.org/cgi-bin/carddisp.pl?gene=PON1
SERPINE1	Serpin Family E Member 1	Protein Coding	P05121	64	GC07P101127	45.8616	https://www.genecards.org/cgi-bin/carddisp.pl?gene=SERPINE1
PRKN	Parkin RBR E3 Ubiquitin Protein Ligase	Protein Coding	O60260	62	GC06M161348	45.8045	https://www.genecards.org/cgi-bin/carddisp.pl?gene=PRKN
MMUT	Methylmalonyl-CoA Mutase	Protein Coding	P22033	58	GC06M049430	45.726	https://www.genecards.org/cgi-bin/carddisp.pl?gene=MMUT
SDHA	Succinate Dehydrogenase Complex Flavoprotein Subunit A	Protein Coding	P31040	60	GC05P000232	45.6908	https://www.genecards.org/cgi-bin/carddisp.pl?gene=SDHA
HMOX1	Heme Oxygenase 1	Protein Coding	P09601	65	GC22P035380	45.6453	https://www.genecards.org/cgi-bin/carddisp.pl?gene=HMOX1
SCN1A	Sodium Voltage-Gated Channel Alpha Subunit 1	Protein Coding	P35498	60	GC02M165989	45.614	https://www.genecards.org/cgi-bin/carddisp.pl?gene=SCN1A
F2	Coagulation Factor II, Thrombin	Protein Coding	P00734	63	GC11P048054	45.5583	https://www.genecards.org/cgi-bin/carddisp.pl?gene=F2
MAPK1	Mitogen-Activated Protein Kinase 1	Protein Coding	P28482	66	GC22M021759	45.5406	https://www.genecards.org/cgi-bin/carddisp.pl?gene=MAPK1
FAS	Fas Cell Surface Death Receptor	Protein Coding	P25445	64	GC10P112626	45.5121	https://www.genecards.org/cgi-bin/carddisp.pl?gene=FAS
CTLA4	Cytotoxic T-Lymphocyte Associated Protein 4	Protein Coding	P16410	61	GC02P204076	45.4227	https://www.genecards.org/cgi-bin/carddisp.pl?gene=CTLA4
SERPINA1	Serpin Family A Member 1	Protein Coding	P01009	62	GC14M094376	45.2346	https://www.genecards.org/cgi-bin/carddisp.pl?gene=SERPINA1
TLR4	Toll Like Receptor 4	Protein Coding	O00206	64	GC09P117704	45.2009	https://www.genecards.org/cgi-bin/carddisp.pl?gene=TLR4
SQSTM1	Sequestosome 1	Protein Coding	Q13501	62	GC05P179806	45.1816	https://www.genecards.org/cgi-bin/carddisp.pl?gene=SQSTM1
HEXA	Hexosaminidase Subunit Alpha	Protein Coding	P06865	60	GC15M072340	45.003	https://www.genecards.org/cgi-bin/carddisp.pl?gene=HEXA
NR3C1	Nuclear Receptor Subfamily 3 Group C Member 1	Protein Coding	P04150	62	GC05M143277	44.8908	https://www.genecards.org/cgi-bin/carddisp.pl?gene=NR3C1
GSTT1	Glutathione S-Transferase Theta 1	Protein Coding	P30711	44	GC22Mi00270	44.8792	https://www.genecards.org/cgi-bin/carddisp.pl?gene=GSTT1
CTSD	Cathepsin D	Protein Coding	P07339	66	GC11M001752	44.8042	https://www.genecards.org/cgi-bin/carddisp.pl?gene=CTSD
RPGRIP1L	RPGRIP1 Like	Protein Coding	Q68CZ1	55	GC16M053729	44.8011	https://www.genecards.org/cgi-bin/carddisp.pl?gene=RPGRIP1L
SMAD5-AS1	SMAD5 Antisense RNA 1	RNA Gene	Q9Y6J3	31	GC05M136129	44.7847	https://www.genecards.org/cgi-bin/carddisp.pl?gene=SMAD5-AS1
SCN2A	Sodium Voltage-Gated Channel Alpha Subunit 2	Protein Coding	Q99250	61	GC02P165194	44.7528	https://www.genecards.org/cgi-bin/carddisp.pl?gene=SCN2A
PCSK9	Proprotein Convertase Subtilisin/Kexin Type 9	Protein Coding	Q8NBP7	63	GC01P055039	44.7452	https://www.genecards.org/cgi-bin/carddisp.pl?gene=PCSK9
HTRA1	HtrA Serine Peptidase 1	Protein Coding	Q92743	58	GC10P122461	44.6646	https://www.genecards.org/cgi-bin/carddisp.pl?gene=HTRA1
NRAS	NRAS Proto-Oncogene, GTPase	Protein Coding	P01111	63	GC01M114704	44.6207	https://www.genecards.org/cgi-bin/carddisp.pl?gene=NRAS
ARSA	Arylsulfatase A	Protein Coding	P15289	60	GC22M050622	44.3698	https://www.genecards.org/cgi-bin/carddisp.pl?gene=ARSA
PLA2G6	Phospholipase A2 Group VI	Protein Coding	O60733	59	GC22M080968	44.3433	https://www.genecards.org/cgi-bin/carddisp.pl?gene=PLA2G6
SLC39A8	Solute Carrier Family 39 Member 8	Protein Coding	Q9C0K1	56	GC04M102252	44.3202	https://www.genecards.org/cgi-bin/carddisp.pl?gene=SLC39A8
PSEN1	Presenilin 1	Protein Coding	P49768	66	GC14P073136	44.1282	https://www.genecards.org/cgi-bin/carddisp.pl?gene=PSEN1
AKT2	AKT Serine/Threonine Kinase 2	Protein Coding	P31751	67	GC19M040230	44.0765	https://www.genecards.org/cgi-bin/carddisp.pl?gene=AKT2
PRNP	Prion Protein (Kanno Blood Group)	Protein Coding	F7VJQ1	61	GC20P004686	43.9181	https://www.genecards.org/cgi-bin/carddisp.pl?gene=PRNP
ATP7A	ATPase Copper Transporting Alpha	Protein Coding	Q04656	58	GC0XP078188	43.8832	https://www.genecards.org/cgi-bin/carddisp.pl?gene=ATP7A
TYR	Tyrosinase	Protein Coding	P14679	61	GC11P089177	43.8538	https://www.genecards.org/cgi-bin/carddisp.pl?gene=TYR
CACNA1A	Calcium Voltage-Gated Channel Subunit Alpha1 A	Protein Coding	O00555	60	GC19M013206	43.8307	https://www.genecards.org/cgi-bin/carddisp.pl?gene=CACNA1A
CYP2E1	Cytochrome P450 Family 2 Subfamily E Member 1	Protein Coding	P05181	59	GC10P133520	43.7217	https://www.genecards.org/cgi-bin/carddisp.pl?gene=CYP2E1
PC	Pyruvate Carboxylase	Protein Coding	P11498	60	GC11M066848	43.6998	https://www.genecards.org/cgi-bin/carddisp.pl?gene=PC
COL2A1	Collagen Type II Alpha 1 Chain	Protein Coding	P02458	63	GC12M047972	43.5992	https://www.genecards.org/cgi-bin/carddisp.pl?gene=COL2A1
VCP	Valosin Containing Protein	Protein Coding	P55072	62	GC09M035298	43.5256	https://www.genecards.org/cgi-bin/carddisp.pl?gene=VCP
CFB	Complement Factor B	Protein Coding	P00751	60	GC06P031945	43.5168	https://www.genecards.org/cgi-bin/carddisp.pl?gene=CFB
KCNH2	Potassium Voltage-Gated Channel Subfamily H Member 2	Protein Coding	Q12809	63	GC07M150944	43.4251	https://www.genecards.org/cgi-bin/carddisp.pl?gene=KCNH2
ATP13A2	ATPase Cation Transporting 13A2	Protein Coding	Q9NQ11	56	GC01M016985	43.285	https://www.genecards.org/cgi-bin/carddisp.pl?gene=ATP13A2
TGFBR2	Transforming Growth Factor Beta Receptor 2	Protein Coding	P37173	65	GC03P030623	43.2605	https://www.genecards.org/cgi-bin/carddisp.pl?gene=TGFBR2
MTTP	Microsomal Triglyceride Transfer Protein	Protein Coding	P55157	57	GC04P099563	43.2453	https://www.genecards.org/cgi-bin/carddisp.pl?gene=MTTP
STK11	Serine/Threonine Kinase 11	Protein Coding	Q15831	63	GC19P001177	43.2309	https://www.genecards.org/cgi-bin/carddisp.pl?gene=STK11
XDH	Xanthine Dehydrogenase	Protein Coding	P47989	60	GC02M031334	43.0148	https://www.genecards.org/cgi-bin/carddisp.pl?gene=XDH
CXCL8	C-X-C Motif Chemokine Ligand 8	Protein Coding	P10145	56	GC04P073740	42.9846	https://www.genecards.org/cgi-bin/carddisp.pl?gene=CXCL8
ARMS2	Age-Related Maculopathy Susceptibility 2	Protein Coding	P0C7Q2	42	GC10P122454	42.9793	https://www.genecards.org/cgi-bin/carddisp.pl?gene=ARMS2
CHEK2	Checkpoint Kinase 2	Protein Coding	O96017	67	GC22M028687	42.9571	https://www.genecards.org/cgi-bin/carddisp.pl?gene=CHEK2
VHL	Von Hippel-Lindau Tumor Suppressor	Protein Coding	P40337	60	GC03P022792	42.9508	https://www.genecards.org/cgi-bin/carddisp.pl?gene=VHL
GALC	Galactosylceramidase	Protein Coding	P54803	58	GC14M087837	42.927	https://www.genecards.org/cgi-bin/carddisp.pl?gene=GALC
SLC17A5	Solute Carrier Family 17 Member 5	Protein Coding	Q9NRA2	58	GC06M073593	42.5704	https://www.genecards.org/cgi-bin/carddisp.pl?gene=SLC17A5
ALDH2	Aldehyde Dehydrogenase 2 Family Member	Protein Coding	P05091	64	GC12P111766	42.3905	https://www.genecards.org/cgi-bin/carddisp.pl?gene=ALDH2
CCL2	C-C Motif Chemokine Ligand 2	Protein Coding	P13500	62	GC17P034255	42.3205	https://www.genecards.org/cgi-bin/carddisp.pl?gene=CCL2
BMP2	Bone Morphogenetic Protein 2	Protein Coding	P12643	59	GC20P006767	42.2286	https://www.genecards.org/cgi-bin/carddisp.pl?gene=BMP2
AGT	Angiotensinogen	Protein Coding	P01019	63	GC01M230690	42.1476	https://www.genecards.org/cgi-bin/carddisp.pl?gene=AGT
JUN	Jun Proto-Oncogene, AP-1 Transcription Factor Subunit	Protein Coding	P05412	63	GC01M058780	42.0894	https://www.genecards.org/cgi-bin/carddisp.pl?gene=JUN
G6PC1	Glucose-6-Phosphatase Catalytic Subunit 1	Protein Coding	P35575	56	GC17P124441	42.0579	https://www.genecards.org/cgi-bin/carddisp.pl?gene=G6PC1
CERNA3	Competing Endogenous LncRNA 3 For MiR-645	RNA Gene		21	GC08P056352	42.0418	https://www.genecards.org/cgi-bin/carddisp.pl?gene=CERNA3
PGK1	Phosphoglycerate Kinase 1	Protein Coding	P00558	62	GC0XP078190	41.9064	https://www.genecards.org/cgi-bin/carddisp.pl?gene=PGK1
UCP2	Uncoupling Protein 2	Protein Coding	P55851	59	GC11M073974	41.8751	https://www.genecards.org/cgi-bin/carddisp.pl?gene=UCP2
PANK2	Pantothenate Kinase 2	Protein Coding	Q9BZ23	58	GC20P008991	41.836	https://www.genecards.org/cgi-bin/carddisp.pl?gene=PANK2
KIT	KIT Proto-Oncogene, Receptor Tyrosine Kinase	Protein Coding	P10721	66	GC04P054657	41.7669	https://www.genecards.org/cgi-bin/carddisp.pl?gene=KIT
CYP2B6	Cytochrome P450 Family 2 Subfamily B Member 6	Protein Coding	P20813	59	GC19P040991	41.6813	https://www.genecards.org/cgi-bin/carddisp.pl?gene=CYP2B6
NPC2	NPC Intracellular Cholesterol Transporter 2	Protein Coding	P61916	56	GC14M074476	41.6299	https://www.genecards.org/cgi-bin/carddisp.pl?gene=NPC2
CAV1	Caveolin 1	Protein Coding	Q03135	62	GC07P116524	41.624	https://www.genecards.org/cgi-bin/carddisp.pl?gene=CAV1
CYP2A6	Cytochrome P450 Family 2 Subfamily A Member 6	Protein Coding	P11509	58	GC19M040843	41.4759	https://www.genecards.org/cgi-bin/carddisp.pl?gene=CYP2A6
NOTCH3	Notch Receptor 3	Protein Coding	Q9UM47	64	GC19M015159	41.4261	https://www.genecards.org/cgi-bin/carddisp.pl?gene=NOTCH3
PTGS2	Prostaglandin-Endoperoxide Synthase 2	Protein Coding	P35354	62	GC01M186671	41.3997	https://www.genecards.org/cgi-bin/carddisp.pl?gene=PTGS2
STAT1	Signal Transducer And Activator Of Transcription 1	Protein Coding	P42224	66	GC02M190908	41.3972	https://www.genecards.org/cgi-bin/carddisp.pl?gene=STAT1
SLC25A20	Solute Carrier Family 25 Member 20	Protein Coding	O43772	58	GC03M048949	41.3387	https://www.genecards.org/cgi-bin/carddisp.pl?gene=SLC25A20
GLUD1	Glutamate Dehydrogenase 1	Protein Coding	P00367	63	GC10M087050	41.2747	https://www.genecards.org/cgi-bin/carddisp.pl?gene=GLUD1
MAP2K1	Mitogen-Activated Protein Kinase Kinase 1	Protein Coding	Q02750	67	GC15P066386	41.2326	https://www.genecards.org/cgi-bin/carddisp.pl?gene=MAP2K1
BTD	Biotinidase	Protein Coding	P43251	58	GC03P022930	41.2199	https://www.genecards.org/cgi-bin/carddisp.pl?gene=BTD
XRCC1	X-Ray Repair Cross Complementing 1	Protein Coding	P18887	58	GC19M043543	41.2113	https://www.genecards.org/cgi-bin/carddisp.pl?gene=XRCC1
RUNX2	RUNX Family Transcription Factor 2	Protein Coding	Q13950	59	GC06P144988	41.1806	https://www.genecards.org/cgi-bin/carddisp.pl?gene=RUNX2
SETD2	SET Domain Containing 2, Histone Lysine Methyltransferase	Protein Coding	Q9BYW2	60	GC03M047033	41.1729	https://www.genecards.org/cgi-bin/carddisp.pl?gene=SETD2
PIK3R1	Phosphoinositide-3-Kinase Regulatory Subunit 1	Protein Coding	P27986	64	GC05P068215	41.1236	https://www.genecards.org/cgi-bin/carddisp.pl?gene=PIK3R1
HMGCL	3-Hydroxy-3-Methylglutaryl-CoA Lyase	Protein Coding	P35914	59	GC01M023801	41.1091	https://www.genecards.org/cgi-bin/carddisp.pl?gene=HMGCL
MIR21	MicroRNA 21	RNA Gene		33	GC17P123488	41.0583	https://www.genecards.org/cgi-bin/carddisp.pl?gene=MIR21
HLA-DRB1	Major Histocompatibility Complex, Class II, DR Beta 1	Protein Coding	P01911	59	GC06M097159	41.0392	https://www.genecards.org/cgi-bin/carddisp.pl?gene=HLA-DRB1
ELN	Elastin	Protein Coding	P15502	56	GC07P074027	41.0234	https://www.genecards.org/cgi-bin/carddisp.pl?gene=ELN
LAMP2	Lysosomal Associated Membrane Protein 2	Protein Coding	P13473	58	GC0XM120426	41.0234	https://www.genecards.org/cgi-bin/carddisp.pl?gene=LAMP2
MSH6	MutS Homolog 6	Protein Coding	P52701	62	GC02P047695	40.883	https://www.genecards.org/cgi-bin/carddisp.pl?gene=MSH6
GUSB	Glucuronidase Beta	Protein Coding	P08236	62	GC07M065960	40.8157	https://www.genecards.org/cgi-bin/carddisp.pl?gene=GUSB
MPO	Myeloperoxidase	Protein Coding	P05164	66	GC17M058269	40.7938	https://www.genecards.org/cgi-bin/carddisp.pl?gene=MPO
POMGNT1	Protein O-Linked Mannose N-Acetylglucosaminyltransferase 1 (Beta 1,2-)	Protein Coding	Q8WZA1	57	GC01M046188	40.7156	https://www.genecards.org/cgi-bin/carddisp.pl?gene=POMGNT1
SIRT1	Sirtuin 1	Protein Coding	Q96EB6	62	GC10P067884	40.6991	https://www.genecards.org/cgi-bin/carddisp.pl?gene=SIRT1
HSD17B10	Hydroxysteroid 17-Beta Dehydrogenase 10	Protein Coding	Q99714	60	GC0XM053431	40.6781	https://www.genecards.org/cgi-bin/carddisp.pl?gene=HSD17B10
SORL1	Sortilin Related Receptor 1	Protein Coding	Q92673	58	GC11P121452	40.6603	https://www.genecards.org/cgi-bin/carddisp.pl?gene=SORL1
CRYAB	Crystallin Alpha B	Protein Coding	P02511	59	GC11M111908	40.6457	https://www.genecards.org/cgi-bin/carddisp.pl?gene=CRYAB
POR	Cytochrome P450 Oxidoreductase	Protein Coding	P16435	62	GC07P075899	40.5412	https://www.genecards.org/cgi-bin/carddisp.pl?gene=POR
PDGFRB	Platelet Derived Growth Factor Receptor Beta	Protein Coding	P09619	66	GC05M150113	40.5273	https://www.genecards.org/cgi-bin/carddisp.pl?gene=PDGFRB
CASP3	Caspase 3	Protein Coding	P42574	62	GC04M184627	40.4539	https://www.genecards.org/cgi-bin/carddisp.pl?gene=CASP3
VWF	Von Willebrand Factor	Protein Coding	P04275	60	GC12M030626	40.4241	https://www.genecards.org/cgi-bin/carddisp.pl?gene=VWF
ACTB	Actin Beta	Protein Coding	P60709	63	GC07M005549	40.3918	https://www.genecards.org/cgi-bin/carddisp.pl?gene=ACTB
NAGLU	N-Acetyl-Alpha-Glucosaminidase	Protein Coding	P54802	56	GC17P123062	40.3887	https://www.genecards.org/cgi-bin/carddisp.pl?gene=NAGLU
GLUL	Glutamate-Ammonia Ligase	Protein Coding	P15104	61	GC01M182378	40.3566	https://www.genecards.org/cgi-bin/carddisp.pl?gene=GLUL
HSPD1	Heat Shock Protein Family D (Hsp60) Member 1	Protein Coding	P10809	62	GC02M197486	40.208	https://www.genecards.org/cgi-bin/carddisp.pl?gene=HSPD1
ASS1	Argininosuccinate Synthase 1	Protein Coding	P00966	62	GC09P130444	40.082	https://www.genecards.org/cgi-bin/carddisp.pl?gene=ASS1
TARDBP	TAR DNA Binding Protein	Protein Coding	Q13148	60	GC01P051196	40.0513	https://www.genecards.org/cgi-bin/carddisp.pl?gene=TARDBP
POMC	Proopiomelanocortin	Protein Coding	P01189	61	GC02M025160	39.9726	https://www.genecards.org/cgi-bin/carddisp.pl?gene=POMC
CD36	CD36 Molecule (CD36 Blood Group)	Protein Coding	P16671	63	GC07P080369	39.9011	https://www.genecards.org/cgi-bin/carddisp.pl?gene=CD36
ALDH7A1	Aldehyde Dehydrogenase 7 Family Member A1	Protein Coding	P49419	60	GC05M126541	39.8612	https://www.genecards.org/cgi-bin/carddisp.pl?gene=ALDH7A1
STAR	Steroidogenic Acute Regulatory Protein	Protein Coding	P49675	58	GC08M038333	39.8358	https://www.genecards.org/cgi-bin/carddisp.pl?gene=STAR
PPT1	Palmitoyl-Protein Thioesterase 1	Protein Coding	P50897	59	GC01M040213	39.7553	https://www.genecards.org/cgi-bin/carddisp.pl?gene=PPT1
MPV17	Mitochondrial Inner Membrane Protein MPV17	Protein Coding	P39210	54	GC02M027309	39.5229	https://www.genecards.org/cgi-bin/carddisp.pl?gene=MPV17
IDH2	Isocitrate Dehydrogenase (NADP(+)) 2	Protein Coding	P48735	66	GC15M090083	39.4767	https://www.genecards.org/cgi-bin/carddisp.pl?gene=IDH2
APOC3	Apolipoprotein C3	Protein Coding	P02656	58	GC11P116829	39.4052	https://www.genecards.org/cgi-bin/carddisp.pl?gene=APOC3
EPHX1	Epoxide Hydrolase 1	Protein Coding	P07099	57	GC01P225810	39.3504	https://www.genecards.org/cgi-bin/carddisp.pl?gene=EPHX1
FUS	FUS RNA Binding Protein	Protein Coding	P35637	58	GC16P031180	39.3288	https://www.genecards.org/cgi-bin/carddisp.pl?gene=FUS
MMP9	Matrix Metallopeptidase 9	Protein Coding	P14780	66	GC20P046008	39.3153	https://www.genecards.org/cgi-bin/carddisp.pl?gene=MMP9
MIR7-3HG	MIR7-3 Host Gene	RNA Gene	Q8N6C7	35	GC19P122009	39.2382	https://www.genecards.org/cgi-bin/carddisp.pl?gene=MIR7-3HG
GFAP	Glial Fibrillary Acidic Protein	Protein Coding	P14136	61	GC17M085348	39.1583	https://www.genecards.org/cgi-bin/carddisp.pl?gene=GFAP
IGF1R	Insulin Like Growth Factor 1 Receptor	Protein Coding	P08069	68	GC15P098648	39.151	https://www.genecards.org/cgi-bin/carddisp.pl?gene=IGF1R
PTH	Parathyroid Hormone	Protein Coding	P01270	58	GC11M013492	39.0527	https://www.genecards.org/cgi-bin/carddisp.pl?gene=PTH
PTHLH	Parathyroid Hormone Like Hormone	Protein Coding	P12272	59	GC12M031136	39.0037	https://www.genecards.org/cgi-bin/carddisp.pl?gene=PTHLH
LRRK2	Leucine Rich Repeat Kinase 2	Protein Coding	Q5S007	62	GC12P040196	38.9563	https://www.genecards.org/cgi-bin/carddisp.pl?gene=LRRK2
JAK2	Janus Kinase 2	Protein Coding	O60674	66	GC09P004985	38.9015	https://www.genecards.org/cgi-bin/carddisp.pl?gene=JAK2
COL4A1	Collagen Type IV Alpha 1 Chain	Protein Coding	P02462	60	GC13M110148	38.9003	https://www.genecards.org/cgi-bin/carddisp.pl?gene=COL4A1
DDC	Dopa Decarboxylase	Protein Coding	P20711	63	GC07M050458	38.8985	https://www.genecards.org/cgi-bin/carddisp.pl?gene=DDC
IL1A	Interleukin 1 Alpha	Protein Coding	P01583	58	GC02M112773	38.8873	https://www.genecards.org/cgi-bin/carddisp.pl?gene=IL1A
COL1A2	Collagen Type I Alpha 2 Chain	Protein Coding	P08123	60	GC07P094394	38.8819	https://www.genecards.org/cgi-bin/carddisp.pl?gene=COL1A2
TGFBR1	Transforming Growth Factor Beta Receptor 1	Protein Coding	P36897	67	GC09P102398	38.8492	https://www.genecards.org/cgi-bin/carddisp.pl?gene=TGFBR1
SDHD	Succinate Dehydrogenase Complex Subunit D	Protein Coding	O14521	57	GC11P112613	38.822	https://www.genecards.org/cgi-bin/carddisp.pl?gene=SDHD
CASP8	Caspase 8	Protein Coding	Q14790	65	GC02P201233	38.7856	https://www.genecards.org/cgi-bin/carddisp.pl?gene=CASP8
NQO1	NAD(P)H Quinone Dehydrogenase 1	Protein Coding	P15559	60	GC16M069706	38.7504	https://www.genecards.org/cgi-bin/carddisp.pl?gene=NQO1
RAI1	Retinoic Acid Induced 1	Protein Coding	Q7Z5J4	52	GC17P122253	38.6612	https://www.genecards.org/cgi-bin/carddisp.pl?gene=RAI1
IGF2	Insulin Like Growth Factor 2	Protein Coding	P01344	62	GC11M012582	38.6217	https://www.genecards.org/cgi-bin/carddisp.pl?gene=IGF2
CDKL5	Cyclin Dependent Kinase Like 5	Protein Coding	O76039	55	GC0XP018425	38.4413	https://www.genecards.org/cgi-bin/carddisp.pl?gene=CDKL5
PINK1	PTEN Induced Kinase 1	Protein Coding	Q9BXM7	59	GC01P051861	38.4225	https://www.genecards.org/cgi-bin/carddisp.pl?gene=PINK1
FTO	FTO Alpha-Ketoglutarate Dependent Dioxygenase	Protein Coding	Q9C0B1	59	GC16P097259	38.3959	https://www.genecards.org/cgi-bin/carddisp.pl?gene=FTO
IDH1	Isocitrate Dehydrogenase (NADP(+)) 1	Protein Coding	O75874	66	GC02M208236	38.3059	https://www.genecards.org/cgi-bin/carddisp.pl?gene=IDH1
RMRP	RNA Component Of Mitochondrial RNA Processing Endoribonuclease	RNA Gene		33	GC09M035655	38.2979	https://www.genecards.org/cgi-bin/carddisp.pl?gene=RMRP
TF	Transferrin	Protein Coding	P02787	64	GC03P140082	38.2486	https://www.genecards.org/cgi-bin/carddisp.pl?gene=TF
CDK4	Cyclin Dependent Kinase 4	Protein Coding	P11802	67	GC12M059651	38.2348	https://www.genecards.org/cgi-bin/carddisp.pl?gene=CDK4
FOS	Fos Proto-Oncogene, AP-1 Transcription Factor Subunit	Protein Coding	P01100	64	GC14P075278	38.2345	https://www.genecards.org/cgi-bin/carddisp.pl?gene=FOS
TERC	Telomerase RNA Component	RNA Gene		39	GC03M169765	38.2095	https://www.genecards.org/cgi-bin/carddisp.pl?gene=TERC
PDHA1	Pyruvate Dehydrogenase E1 Subunit Alpha 1	Protein Coding	P08559	60	GC0XP019343	38.1948	https://www.genecards.org/cgi-bin/carddisp.pl?gene=PDHA1
PSEN2	Presenilin 2	Protein Coding	P49810	62	GC01P226870	38.184	https://www.genecards.org/cgi-bin/carddisp.pl?gene=PSEN2
KCNQ2	Potassium Voltage-Gated Channel Subfamily Q Member 2	Protein Coding	O43526	60	GC20M063400	38.1535	https://www.genecards.org/cgi-bin/carddisp.pl?gene=KCNQ2
CACNA1C	Calcium Voltage-Gated Channel Subunit Alpha1 C	Protein Coding	Q13936	62	GC12P001970	38.0986	https://www.genecards.org/cgi-bin/carddisp.pl?gene=CACNA1C
ATR	ATR Serine/Threonine Kinase	Protein Coding	Q13535	66	GC03M142449	38.0634	https://www.genecards.org/cgi-bin/carddisp.pl?gene=ATR
TNFRSF1A	TNF Receptor Superfamily Member 1A	Protein Coding	P19438	63	GC12M006328	38.055	https://www.genecards.org/cgi-bin/carddisp.pl?gene=TNFRSF1A
DRD2	Dopamine Receptor D2	Protein Coding	P14416	63	GC11M113409	38.0111	https://www.genecards.org/cgi-bin/carddisp.pl?gene=DRD2
ACACA	Acetyl-CoA Carboxylase Alpha	Protein Coding	Q13085	62	GC17M037084	37.9541	https://www.genecards.org/cgi-bin/carddisp.pl?gene=ACACA
CYP11A1	Cytochrome P450 Family 11 Subfamily A Member 1	Protein Coding	P05108	62	GC15M074337	37.94	https://www.genecards.org/cgi-bin/carddisp.pl?gene=CYP11A1
POMT1	Protein O-Mannosyltransferase 1	Protein Coding	Q9Y6A1	57	GC09P131502	37.8233	https://www.genecards.org/cgi-bin/carddisp.pl?gene=POMT1
NEU1	Neuraminidase 1	Protein Coding	Q99519	59	GC06M031857	37.7471	https://www.genecards.org/cgi-bin/carddisp.pl?gene=NEU1
CDKN1A	Cyclin Dependent Kinase Inhibitor 1A	Protein Coding	P38936	63	GC06P144910	37.7154	https://www.genecards.org/cgi-bin/carddisp.pl?gene=CDKN1A
ATP1A3	ATPase Na+/K+ Transporting Subunit Alpha 3	Protein Coding	P13637	61	GC19M041966	37.6841	https://www.genecards.org/cgi-bin/carddisp.pl?gene=ATP1A3
FASN	Fatty Acid Synthase	Protein Coding	P49327	62	GC17M082078	37.6621	https://www.genecards.org/cgi-bin/carddisp.pl?gene=FASN
TFRC	Transferrin Receptor	Protein Coding	P02786	63	GC03M196520	37.5729	https://www.genecards.org/cgi-bin/carddisp.pl?gene=TFRC
PEX5	Peroxisomal Biogenesis Factor 5	Protein Coding	P50542	57	GC12P042138	37.5312	https://www.genecards.org/cgi-bin/carddisp.pl?gene=PEX5
FOXP3	Forkhead Box P3	Protein Coding	Q9BZS1	60	GC0XM049250	37.4906	https://www.genecards.org/cgi-bin/carddisp.pl?gene=FOXP3
MMP2	Matrix Metallopeptidase 2	Protein Coding	P08253	66	GC16P097295	37.3982	https://www.genecards.org/cgi-bin/carddisp.pl?gene=MMP2
CSF1R	Colony Stimulating Factor 1 Receptor	Protein Coding	P07333	65	GC05M150053	37.3371	https://www.genecards.org/cgi-bin/carddisp.pl?gene=CSF1R
SRC	SRC Proto-Oncogene, Non-Receptor Tyrosine Kinase	Protein Coding	P12931	64	GC20P037344	37.3237	https://www.genecards.org/cgi-bin/carddisp.pl?gene=SRC
IL4	Interleukin 4	Protein Coding	P05112	59	GC05P132673	37.2634	https://www.genecards.org/cgi-bin/carddisp.pl?gene=IL4
IL1RN	Interleukin 1 Receptor Antagonist	Protein Coding	P18510	63	GC02P146140	37.2577	https://www.genecards.org/cgi-bin/carddisp.pl?gene=IL1RN
DBH	Dopamine Beta-Hydroxylase	Protein Coding	P09172	64	GC09P133636	37.2002	https://www.genecards.org/cgi-bin/carddisp.pl?gene=DBH
ADAR	Adenosine Deaminase RNA Specific	Protein Coding	P55265	59	GC01M163944	37.016	https://www.genecards.org/cgi-bin/carddisp.pl?gene=ADAR
PARN	Poly(A)-Specific Ribonuclease	Protein Coding	O95453	57	GC16M014435	37.0054	https://www.genecards.org/cgi-bin/carddisp.pl?gene=PARN
NLRP3	NLR Family Pyrin Domain Containing 3	Protein Coding	Q96P20	61	GC01P247496	37.0001	https://www.genecards.org/cgi-bin/carddisp.pl?gene=NLRP3
DNM1L	Dynamin 1 Like	Protein Coding	O00429	61	GC12P032679	36.9854	https://www.genecards.org/cgi-bin/carddisp.pl?gene=DNM1L
GAMT	Guanidinoacetate N-Methyltransferase	Protein Coding	Q14353	59	GC19M001397	36.9576	https://www.genecards.org/cgi-bin/carddisp.pl?gene=GAMT
CST3	Cystatin C	Protein Coding	P01034	56	GC20M023970	36.9401	https://www.genecards.org/cgi-bin/carddisp.pl?gene=CST3
IL2	Interleukin 2	Protein Coding	P60568	59	GC04M122451	36.8517	https://www.genecards.org/cgi-bin/carddisp.pl?gene=IL2
HSPB1	Heat Shock Protein Family B (Small) Member 1	Protein Coding	P04792	64	GC07P076302	36.851	https://www.genecards.org/cgi-bin/carddisp.pl?gene=HSPB1
QDPR	Quinoid Dihydropteridine Reductase	Protein Coding	P09417	59	GC04M017460	36.8408	https://www.genecards.org/cgi-bin/carddisp.pl?gene=QDPR
SPG11	SPG11 Vesicle Trafficking Associated, Spatacsin	Protein Coding	Q96JI7	52	GC15M044946	36.8365	https://www.genecards.org/cgi-bin/carddisp.pl?gene=SPG11
COL3A1	Collagen Type III Alpha 1 Chain	Protein Coding	P02461	61	GC02P188974	36.8277	https://www.genecards.org/cgi-bin/carddisp.pl?gene=COL3A1
PURA	Purine Rich Element Binding Protein A	Protein Coding	Q00577	58	GC05P153562	36.7678	https://www.genecards.org/cgi-bin/carddisp.pl?gene=PURA
FGF23	Fibroblast Growth Factor 23	Protein Coding	Q9GZV9	59	GC12M004368	36.7114	https://www.genecards.org/cgi-bin/carddisp.pl?gene=FGF23
FMR1	Fragile X Messenger Ribonucleoprotein 1	Protein Coding	Q06787	57	GC0XP148000	36.5566	https://www.genecards.org/cgi-bin/carddisp.pl?gene=FMR1
MET	MET Proto-Oncogene, Receptor Tyrosine Kinase	Protein Coding	P08581	67	GC07P116672	36.5232	https://www.genecards.org/cgi-bin/carddisp.pl?gene=MET
LIPE	Lipase E, Hormone Sensitive Type	Protein Coding	Q05469	60	GC19M042401	36.4808	https://www.genecards.org/cgi-bin/carddisp.pl?gene=LIPE
SLC40A1	Solute Carrier Family 40 Member 1	Protein Coding	Q9NP59	60	GC02M189560	36.317	https://www.genecards.org/cgi-bin/carddisp.pl?gene=SLC40A1
F5	Coagulation Factor V	Protein Coding	P12259	59	GC01M169511	36.3126	https://www.genecards.org/cgi-bin/carddisp.pl?gene=F5
POMT2	Protein O-Mannosyltransferase 2	Protein Coding	Q9UKY4	55	GC14M077274	36.2324	https://www.genecards.org/cgi-bin/carddisp.pl?gene=POMT2
FLNC	Filamin C	Protein Coding	Q14315	58	GC07P128830	36.2182	https://www.genecards.org/cgi-bin/carddisp.pl?gene=FLNC
SP1	Sp1 Transcription Factor	Protein Coding	P08047	59	GC12P053380	36.1417	https://www.genecards.org/cgi-bin/carddisp.pl?gene=SP1
NBN	Nibrin	Protein Coding	O60934	62	GC08M089933	36.1158	https://www.genecards.org/cgi-bin/carddisp.pl?gene=NBN
TNFSF10	TNF Superfamily Member 10	Protein Coding	P50591	57	GC03M172505	36.0634	https://www.genecards.org/cgi-bin/carddisp.pl?gene=TNFSF10
PNPO	Pyridoxamine 5'-Phosphate Oxidase	Protein Coding	Q9NVS9	59	GC17P047941	35.9892	https://www.genecards.org/cgi-bin/carddisp.pl?gene=PNPO
AHR	Aryl Hydrocarbon Receptor	Protein Coding	P35869	60	GC07P016916	35.9298	https://www.genecards.org/cgi-bin/carddisp.pl?gene=AHR
BCHE	Butyrylcholinesterase	Protein Coding	P06276	63	GC03M165772	35.8375	https://www.genecards.org/cgi-bin/carddisp.pl?gene=BCHE
CHAT	Choline O-Acetyltransferase	Protein Coding	P28329	62	GC10P049609	35.8039	https://www.genecards.org/cgi-bin/carddisp.pl?gene=CHAT
NOS2	Nitric Oxide Synthase 2	Protein Coding	P35228	62	GC17M027756	35.748	https://www.genecards.org/cgi-bin/carddisp.pl?gene=NOS2
SCN8A	Sodium Voltage-Gated Channel Alpha Subunit 8	Protein Coding	Q9UQD0	62	GC12P051590	35.5851	https://www.genecards.org/cgi-bin/carddisp.pl?gene=SCN8A
MIR125A	MicroRNA 125a	RNA Gene		31	GC19P123545	35.5765	https://www.genecards.org/cgi-bin/carddisp.pl?gene=MIR125A
NPPA	Natriuretic Peptide A	Protein Coding	P01160	58	GC01M015387	35.5487	https://www.genecards.org/cgi-bin/carddisp.pl?gene=NPPA
ADRB2	Adrenoceptor Beta 2	Protein Coding	P07550	62	GC05P153697	35.5016	https://www.genecards.org/cgi-bin/carddisp.pl?gene=ADRB2
PNP	Purine Nucleoside Phosphorylase	Protein Coding	P00491	62	GC14P047738	35.4315	https://www.genecards.org/cgi-bin/carddisp.pl?gene=PNP
UBE3A	Ubiquitin Protein Ligase E3A	Protein Coding	Q05086	61	GC15M025333	35.3752	https://www.genecards.org/cgi-bin/carddisp.pl?gene=UBE3A
IRS1	Insulin Receptor Substrate 1	Protein Coding	P35568	61	GC02M226731	35.3603	https://www.genecards.org/cgi-bin/carddisp.pl?gene=IRS1
CXCR4	C-X-C Motif Chemokine Receptor 4	Protein Coding	P61073	66	GC02M136114	35.25	https://www.genecards.org/cgi-bin/carddisp.pl?gene=CXCR4
FTL	Ferritin Light Chain	Protein Coding	P02792	59	GC19P048965	35.2143	https://www.genecards.org/cgi-bin/carddisp.pl?gene=FTL
ESR2	Estrogen Receptor 2	Protein Coding	Q92731	61	GC14M064084	35.1934	https://www.genecards.org/cgi-bin/carddisp.pl?gene=ESR2
ALK	ALK Receptor Tyrosine Kinase	Protein Coding	Q9UM73	64	GC02M029190	35.1925	https://www.genecards.org/cgi-bin/carddisp.pl?gene=ALK
MALAT1	Metastasis Associated Lung Adenocarcinoma Transcript 1	RNA Gene		33	GC11P094626	35.1455	https://www.genecards.org/cgi-bin/carddisp.pl?gene=MALAT1
NEK9	NIMA Related Kinase 9	Protein Coding	Q8TD19	58	GC14M075079	35.1155	https://www.genecards.org/cgi-bin/carddisp.pl?gene=NEK9
MYH6	Myosin Heavy Chain 6	Protein Coding	P13533	59	GC14M023381	35.0858	https://www.genecards.org/cgi-bin/carddisp.pl?gene=MYH6
NPY	Neuropeptide Y	Protein Coding	P01303	58	GC07P024293	35.0516	https://www.genecards.org/cgi-bin/carddisp.pl?gene=NPY
MAPK3	Mitogen-Activated Protein Kinase 3	Protein Coding	P27361	63	GC16M044882	35.0482	https://www.genecards.org/cgi-bin/carddisp.pl?gene=MAPK3
RPE65	Retinoid Isomerohydrolase RPE65	Protein Coding	Q16518	58	GC01M068428	35.0439	https://www.genecards.org/cgi-bin/carddisp.pl?gene=RPE65
NTRK2	Neurotrophic Receptor Tyrosine Kinase 2	Protein Coding	Q16620	66	GC09P084668	34.9095	https://www.genecards.org/cgi-bin/carddisp.pl?gene=NTRK2
GAPDH	Glyceraldehyde-3-Phosphate Dehydrogenase	Protein Coding	P04406	64	GC12P042102	34.8727	https://www.genecards.org/cgi-bin/carddisp.pl?gene=GAPDH
NDUFS4	NADH:Ubiquinone Oxidoreductase Subunit S4	Protein Coding	O43181	56	GC05P053560	34.8558	https://www.genecards.org/cgi-bin/carddisp.pl?gene=NDUFS4
CLN6	CLN6 Transmembrane ER Protein	Protein Coding	Q9NWW5	50	GC15M068206	34.7098	https://www.genecards.org/cgi-bin/carddisp.pl?gene=CLN6
FASLG	Fas Ligand	Protein Coding	P48023	61	GC01P172659	34.6888	https://www.genecards.org/cgi-bin/carddisp.pl?gene=FASLG
CAV3	Caveolin 3	Protein Coding	P56539	56	GC03P008733	34.6654	https://www.genecards.org/cgi-bin/carddisp.pl?gene=CAV3
NAT2	N-Acetyltransferase 2	Protein Coding	P11245	56	GC08P018391	34.653	https://www.genecards.org/cgi-bin/carddisp.pl?gene=NAT2
AGTR1	Angiotensin II Receptor Type 1	Protein Coding	P30556	65	GC03P148697	34.6478	https://www.genecards.org/cgi-bin/carddisp.pl?gene=AGTR1
FXN	Frataxin	Protein Coding	Q16595	60	GC09P069035	34.633	https://www.genecards.org/cgi-bin/carddisp.pl?gene=FXN
BAX	BCL2 Associated X, Apoptosis Regulator	Protein Coding	Q07812	64	GC19P048954	34.5781	https://www.genecards.org/cgi-bin/carddisp.pl?gene=BAX
AGK	Acylglycerol Kinase	Protein Coding	Q53H12	53	GC07P141551	34.5425	https://www.genecards.org/cgi-bin/carddisp.pl?gene=AGK
SPR	Sepiapterin Reductase	Protein Coding	P35270	63	GC02P072887	34.4913	https://www.genecards.org/cgi-bin/carddisp.pl?gene=SPR
ABL1	ABL Proto-Oncogene 1, Non-Receptor Tyrosine Kinase	Protein Coding	P00519	66	GC09P130713	34.4585	https://www.genecards.org/cgi-bin/carddisp.pl?gene=ABL1
LARGE1	LARGE Xylosyl- And Glucuronyltransferase 1	Protein Coding	O95461	54	GC22M079246	34.4518	https://www.genecards.org/cgi-bin/carddisp.pl?gene=LARGE1
ZAP70	Zeta Chain Of T Cell Receptor Associated Protein Kinase 70	Protein Coding	P43403	64	GC02P098200	34.4513	https://www.genecards.org/cgi-bin/carddisp.pl?gene=ZAP70
RAG1	Recombination Activating 1	Protein Coding	P15918	56	GC11P036554	34.4305	https://www.genecards.org/cgi-bin/carddisp.pl?gene=RAG1
GPX1	Glutathione Peroxidase 1	Protein Coding	P07203	56	GC03M054007	34.3871	https://www.genecards.org/cgi-bin/carddisp.pl?gene=GPX1
SUOX	Sulfite Oxidase	Protein Coding	P51687	58	GC12P055997	34.3783	https://www.genecards.org/cgi-bin/carddisp.pl?gene=SUOX
PARP1	Poly(ADP-Ribose) Polymerase 1	Protein Coding	P09874	64	GC01M226360	34.2807	https://www.genecards.org/cgi-bin/carddisp.pl?gene=PARP1
CLN5	CLN5 Intracellular Trafficking Protein	Protein Coding	O75503	53	GC13P076990	34.272	https://www.genecards.org/cgi-bin/carddisp.pl?gene=CLN5
BMP6	Bone Morphogenetic Protein 6	Protein Coding	P22004	57	GC06P007726	34.2464	https://www.genecards.org/cgi-bin/carddisp.pl?gene=BMP6
HMBS	Hydroxymethylbilane Synthase	Protein Coding	P08397	58	GC11P119084	34.2282	https://www.genecards.org/cgi-bin/carddisp.pl?gene=HMBS
CRH	Corticotropin Releasing Hormone	Protein Coding	P06850	56	GC08M066176	34.2104	https://www.genecards.org/cgi-bin/carddisp.pl?gene=CRH
ETHE1	ETHE1 Persulfide Dioxygenase	Protein Coding	O95571	55	GC19M043506	34.1259	https://www.genecards.org/cgi-bin/carddisp.pl?gene=ETHE1
KCNQ3	Potassium Voltage-Gated Channel Subfamily Q Member 3	Protein Coding	O43525	59	GC08M132120	34.0936	https://www.genecards.org/cgi-bin/carddisp.pl?gene=KCNQ3
EDN1	Endothelin 1	Protein Coding	P05305	62	GC06P012237	34.0186	https://www.genecards.org/cgi-bin/carddisp.pl?gene=EDN1
NFKBIA	NFKB Inhibitor Alpha	Protein Coding	P25963	64	GC14M035401	34.0166	https://www.genecards.org/cgi-bin/carddisp.pl?gene=NFKBIA
TREX1	Three Prime Repair Exonuclease 1	Protein Coding	Q9NSU2	55	GC03P059849	33.9314	https://www.genecards.org/cgi-bin/carddisp.pl?gene=TREX1
GPC3	Glypican 3	Protein Coding	P51654	59	GC0XM133535	33.9303	https://www.genecards.org/cgi-bin/carddisp.pl?gene=GPC3
PCK1	Phosphoenolpyruvate Carboxykinase 1	Protein Coding	P35558	60	GC20P057561	33.9249	https://www.genecards.org/cgi-bin/carddisp.pl?gene=PCK1
PIK3CG	Phosphatidylinositol-4,5-Bisphosphate 3-Kinase Catalytic Subunit Gamma	Protein Coding	P48736	62	GC07P106865	33.8985	https://www.genecards.org/cgi-bin/carddisp.pl?gene=PIK3CG
PARK7	Parkinsonism Associated Deglycase	Protein Coding	Q99497	60	GC01P050925	33.7826	https://www.genecards.org/cgi-bin/carddisp.pl?gene=PARK7
NPM1	Nucleophosmin 1	Protein Coding	P06748	63	GC05P171387	33.7728	https://www.genecards.org/cgi-bin/carddisp.pl?gene=NPM1
PRRT2	Proline Rich Transmembrane Protein 2	Protein Coding	Q7Z6L0	52	GC16P029811	33.7564	https://www.genecards.org/cgi-bin/carddisp.pl?gene=PRRT2
MME	Membrane Metalloendopeptidase	Protein Coding	P08473	63	GC03P155024	33.6317	https://www.genecards.org/cgi-bin/carddisp.pl?gene=MME
GSR	Glutathione-Disulfide Reductase	Protein Coding	P00390	63	GC08M030678	33.5989	https://www.genecards.org/cgi-bin/carddisp.pl?gene=GSR
KCNA1	Potassium Voltage-Gated Channel Subfamily A Member 1	Protein Coding	Q09470	58	GC12P042065	33.5843	https://www.genecards.org/cgi-bin/carddisp.pl?gene=KCNA1
STXBP1	Syntaxin Binding Protein 1	Protein Coding	P61764	62	GC09P143801	33.5712	https://www.genecards.org/cgi-bin/carddisp.pl?gene=STXBP1
AKT3	AKT Serine/Threonine Kinase 3	Protein Coding	Q9Y243	68	GC01M243488	33.5405	https://www.genecards.org/cgi-bin/carddisp.pl?gene=AKT3
FGA	Fibrinogen Alpha Chain	Protein Coding	P02671	63	GC04M154583	33.5199	https://www.genecards.org/cgi-bin/carddisp.pl?gene=FGA
DCTN1	Dynactin Subunit 1	Protein Coding	Q14203	59	GC02M074361	33.4733	https://www.genecards.org/cgi-bin/carddisp.pl?gene=DCTN1
MCOLN1	Mucolipin TRP Cation Channel 1	Protein Coding	Q9GZU1	56	GC19P122123	33.4218	https://www.genecards.org/cgi-bin/carddisp.pl?gene=MCOLN1
RANBP2	RAN Binding Protein 2	Protein Coding	P49792	57	GC02P108719	33.4158	https://www.genecards.org/cgi-bin/carddisp.pl?gene=RANBP2
GSS	Glutathione Synthetase	Protein Coding	P48637	59	GC20M034928	33.3488	https://www.genecards.org/cgi-bin/carddisp.pl?gene=GSS
F9	Coagulation Factor IX	Protein Coding	P00740	60	GC0XP139530	33.302	https://www.genecards.org/cgi-bin/carddisp.pl?gene=F9
POMGNT2	Protein O-Linked Mannose N-Acetylglucosaminyltransferase 2 (Beta 1,4-)	Protein Coding	Q8NAT1	50	GC03M043121	33.2566	https://www.genecards.org/cgi-bin/carddisp.pl?gene=POMGNT2
APOA2	Apolipoprotein A2	Protein Coding	P02652	58	GC01M161222	33.2223	https://www.genecards.org/cgi-bin/carddisp.pl?gene=APOA2
B2M	Beta-2-Microglobulin	Protein Coding	P61769	63	GC15P044711	33.2194	https://www.genecards.org/cgi-bin/carddisp.pl?gene=B2M
GLS	Glutaminase	Protein Coding	O94925	62	GC02P190880	33.2131	https://www.genecards.org/cgi-bin/carddisp.pl?gene=GLS
VLDLR	Very Low Density Lipoprotein Receptor	Protein Coding	P98155	62	GC09P002611	33.208	https://www.genecards.org/cgi-bin/carddisp.pl?gene=VLDLR
TFAP2A	Transcription Factor AP-2 Alpha	Protein Coding	P05549	60	GC06M010393	33.1908	https://www.genecards.org/cgi-bin/carddisp.pl?gene=TFAP2A
RELA	RELA Proto-Oncogene, NF-KB Subunit	Protein Coding	Q04206	64	GC11M065653	33.1864	https://www.genecards.org/cgi-bin/carddisp.pl?gene=RELA
TAT	Tyrosine Aminotransferase	Protein Coding	P17735	58	GC16M071565	33.181	https://www.genecards.org/cgi-bin/carddisp.pl?gene=TAT
SUCLG1	Succinate-CoA Ligase GDP/ADP-Forming Subunit Alpha	Protein Coding	P53597	58	GC02M084423	33.1789	https://www.genecards.org/cgi-bin/carddisp.pl?gene=SUCLG1
PRKDC	Protein Kinase, DNA-Activated, Catalytic Subunit	Protein Coding	P78527	63	GC08M047773	33.1691	https://www.genecards.org/cgi-bin/carddisp.pl?gene=PRKDC
NKX2-1	NK2 Homeobox 1	Protein Coding	P43699	61	GC14M036516	33.148	https://www.genecards.org/cgi-bin/carddisp.pl?gene=NKX2-1
TFR2	Transferrin Receptor 2	Protein Coding	Q9UP52	58	GC07M100620	33.1086	https://www.genecards.org/cgi-bin/carddisp.pl?gene=TFR2
WRN	WRN RecQ Like Helicase	Protein Coding	Q14191	60	GC08P031033	32.9434	https://www.genecards.org/cgi-bin/carddisp.pl?gene=WRN
TGFB2	Transforming Growth Factor Beta 2	Protein Coding	P61812	64	GC01P218345	32.9218	https://www.genecards.org/cgi-bin/carddisp.pl?gene=TGFB2
HLA-DQB1	Major Histocompatibility Complex, Class II, DQ Beta 1	Protein Coding	P01920	55	GC06M097169	32.888	https://www.genecards.org/cgi-bin/carddisp.pl?gene=HLA-DQB1
POLR1C	RNA Polymerase I And III Subunit C	Protein Coding	O15160	58	GC06P144971	32.8246	https://www.genecards.org/cgi-bin/carddisp.pl?gene=POLR1C
HMGCR	3-Hydroxy-3-Methylglutaryl-CoA Reductase	Protein Coding	P04035	61	GC05P075336	32.77	https://www.genecards.org/cgi-bin/carddisp.pl?gene=HMGCR
SCP2	Sterol Carrier Protein 2	Protein Coding	P22307	58	GC01P052927	32.7523	https://www.genecards.org/cgi-bin/carddisp.pl?gene=SCP2
TREM2	Triggering Receptor Expressed On Myeloid Cells 2	Protein Coding	Q9NZC2	57	GC06M097308	32.7427	https://www.genecards.org/cgi-bin/carddisp.pl?gene=TREM2
GPT	Glutamic--Pyruvic Transaminase	Protein Coding	P24298	55	GC08P144502	32.7271	https://www.genecards.org/cgi-bin/carddisp.pl?gene=GPT
PEPD	Peptidase D	Protein Coding	P12955	58	GC19M033386	32.705	https://www.genecards.org/cgi-bin/carddisp.pl?gene=PEPD
MOCS2	Molybdenum Cofactor Synthesis 2	Protein Coding	O96033	55	GC05M053095	32.702	https://www.genecards.org/cgi-bin/carddisp.pl?gene=MOCS2
CHCHD10	Coiled-Coil-Helix-Coiled-Coil-Helix Domain Containing 10	Protein Coding	Q8WYQ3	52	GC22M023765	32.6961	https://www.genecards.org/cgi-bin/carddisp.pl?gene=CHCHD10
UGT1A6	UDP Glucuronosyltransferase Family 1 Member A6	Protein Coding	P19224	55	GC02P233691	32.677	https://www.genecards.org/cgi-bin/carddisp.pl?gene=UGT1A6
VRK1	VRK Serine/Threonine Kinase 1	Protein Coding	Q99986	60	GC14P096797	32.6585	https://www.genecards.org/cgi-bin/carddisp.pl?gene=VRK1
SPAST	Spastin	Protein Coding	Q9UBP0	54	GC02P032063	32.6176	https://www.genecards.org/cgi-bin/carddisp.pl?gene=SPAST
BCS1L	BCS1 Homolog, Ubiquinol-Cytochrome C Reductase Complex Chaperone	Protein Coding	Q9Y276	57	GC02P218658	32.5993	https://www.genecards.org/cgi-bin/carddisp.pl?gene=BCS1L
TNNI3	Troponin I3, Cardiac Type	Protein Coding	P19429	62	GC19M055151	32.5897	https://www.genecards.org/cgi-bin/carddisp.pl?gene=TNNI3
MT-ATP6	Mitochondrially Encoded ATP Synthase Membrane Subunit 6	Protein Coding	P00846	43	GCMTP008531	32.4705	https://www.genecards.org/cgi-bin/carddisp.pl?gene=MT-ATP6
TKT	Transketolase	Protein Coding	P29401	59	GC03M053224	32.4411	https://www.genecards.org/cgi-bin/carddisp.pl?gene=TKT
CD40LG	CD40 Ligand	Protein Coding	P29965	63	GC0XP136649	32.4311	https://www.genecards.org/cgi-bin/carddisp.pl?gene=CD40LG
MAP2K2	Mitogen-Activated Protein Kinase Kinase 2	Protein Coding	P36507	67	GC19M004090	32.4209	https://www.genecards.org/cgi-bin/carddisp.pl?gene=MAP2K2
PDGFB	Platelet Derived Growth Factor Subunit B	Protein Coding	P01127	64	GC22M080187	32.4101	https://www.genecards.org/cgi-bin/carddisp.pl?gene=PDGFB
MRE11	MRE11 Homolog, Double Strand Break Repair Nuclease	Protein Coding	P49959	61	GC11M129626	32.4071	https://www.genecards.org/cgi-bin/carddisp.pl?gene=MRE11
MIR155	MicroRNA 155	RNA Gene		31	GC21P025573	32.3563	https://www.genecards.org/cgi-bin/carddisp.pl?gene=MIR155
PIK3R2	Phosphoinositide-3-Kinase Regulatory Subunit 2	Protein Coding	O00459	62	GC19P018153	32.287	https://www.genecards.org/cgi-bin/carddisp.pl?gene=PIK3R2
MFSD8	Major Facilitator Superfamily Domain Containing 8	Protein Coding	Q8NHS3	49	GC04M127917	32.2147	https://www.genecards.org/cgi-bin/carddisp.pl?gene=MFSD8
PRODH	Proline Dehydrogenase 1	Protein Coding	O43272	58	GC22M018912	32.153	https://www.genecards.org/cgi-bin/carddisp.pl?gene=PRODH
FBP1	Fructose-Bisphosphatase 1	Protein Coding	P09467	62	GC09M094603	32.1386	https://www.genecards.org/cgi-bin/carddisp.pl?gene=FBP1
MMP1	Matrix Metallopeptidase 1	Protein Coding	P03956	63	GC11M129720	32.1142	https://www.genecards.org/cgi-bin/carddisp.pl?gene=MMP1
PDP1	Pyruvate Dehydrogenase Phosphatase Catalytic Subunit 1	Protein Coding	Q9P0J1	60	GC08P093857	32.1124	https://www.genecards.org/cgi-bin/carddisp.pl?gene=PDP1
HTR1A	5-Hydroxytryptamine Receptor 1A	Protein Coding	P08908	59	GC05M063960	32.1085	https://www.genecards.org/cgi-bin/carddisp.pl?gene=HTR1A
APOC2	Apolipoprotein C2	Protein Coding	P02655	56	GC19P123247	32.0174	https://www.genecards.org/cgi-bin/carddisp.pl?gene=APOC2
ICAM1	Intercellular Adhesion Molecule 1	Protein Coding	P05362	63	GC19P122290	31.9978	https://www.genecards.org/cgi-bin/carddisp.pl?gene=ICAM1
AIFM1	Apoptosis Inducing Factor Mitochondria Associated 1	Protein Coding	O95831	62	GC0XM130129	31.9764	https://www.genecards.org/cgi-bin/carddisp.pl?gene=AIFM1
PRL	Prolactin	Protein Coding	P01236	56	GC06M022287	31.9252	https://www.genecards.org/cgi-bin/carddisp.pl?gene=PRL
MIR126	MicroRNA 126	RNA Gene		31	GC09P136670	31.9186	https://www.genecards.org/cgi-bin/carddisp.pl?gene=MIR126
ADCY10	Adenylate Cyclase 10	Protein Coding	Q96PN6	56	GC01M167809	31.8322	https://www.genecards.org/cgi-bin/carddisp.pl?gene=ADCY10
UCP3	Uncoupling Protein 3	Protein Coding	P55916	55	GC11M074000	31.8109	https://www.genecards.org/cgi-bin/carddisp.pl?gene=UCP3
EPO	Erythropoietin	Protein Coding	P01588	55	GC07P100720	31.7723	https://www.genecards.org/cgi-bin/carddisp.pl?gene=EPO
PPARD	Peroxisome Proliferator Activated Receptor Delta	Protein Coding	Q03181	58	GC06P144888	31.7594	https://www.genecards.org/cgi-bin/carddisp.pl?gene=PPARD
GGT1	Gamma-Glutamyltransferase 1	Protein Coding	P19440	62	GC22P024583	31.7273	https://www.genecards.org/cgi-bin/carddisp.pl?gene=GGT1
EMSLR	E2F1 MRNA Stabilizing LncRNA	RNA Gene		21	GC07P107551	31.4893	https://www.genecards.org/cgi-bin/carddisp.pl?gene=EMSLR
FADD	Fas Associated Via Death Domain	Protein Coding	Q13158	59	GC11P070203	31.4145	https://www.genecards.org/cgi-bin/carddisp.pl?gene=FADD
GMPPB	GDP-Mannose Pyrophosphorylase B	Protein Coding	Q9Y5P6	56	GC03M049716	31.4123	https://www.genecards.org/cgi-bin/carddisp.pl?gene=GMPPB
TPI1	Triosephosphate Isomerase 1	Protein Coding	P60174	60	GC12P006867	31.3807	https://www.genecards.org/cgi-bin/carddisp.pl?gene=TPI1
SPP1	Secreted Phosphoprotein 1	Protein Coding	P10451	57	GC04P087975	31.3278	https://www.genecards.org/cgi-bin/carddisp.pl?gene=SPP1
HTT	Huntingtin	Protein Coding	P42858	56	GC04P003041	31.3203	https://www.genecards.org/cgi-bin/carddisp.pl?gene=HTT
UGT1A9	UDP Glucuronosyltransferase Family 1 Member A9	Protein Coding	O60656	57	GC02P233671	31.1895	https://www.genecards.org/cgi-bin/carddisp.pl?gene=UGT1A9
TGFB3	Transforming Growth Factor Beta 3	Protein Coding	P10600	61	GC14M075958	31.1756	https://www.genecards.org/cgi-bin/carddisp.pl?gene=TGFB3
ITPR1	Inositol 1,4,5-Trisphosphate Receptor Type 1	Protein Coding	Q14643	62	GC03P004486	31.1529	https://www.genecards.org/cgi-bin/carddisp.pl?gene=ITPR1
HTR2A	5-Hydroxytryptamine Receptor 2A	Protein Coding	P28223	60	GC13M046831	31.1329	https://www.genecards.org/cgi-bin/carddisp.pl?gene=HTR2A
F8	Coagulation Factor VIII	Protein Coding	P00451	60	GC0XM154835	31.1322	https://www.genecards.org/cgi-bin/carddisp.pl?gene=F8
MUTYH	MutY DNA Glycosylase	Protein Coding	Q9UIF7	58	GC01M045329	31.1038	https://www.genecards.org/cgi-bin/carddisp.pl?gene=MUTYH
SLC16A1	Solute Carrier Family 16 Member 1	Protein Coding	P53985	60	GC01M113114	31.0919	https://www.genecards.org/cgi-bin/carddisp.pl?gene=SLC16A1
EPM2A	EPM2A Glucan Phosphatase, Laforin	Protein Coding	B3EWF7	54	GC06M145382	31.0307	https://www.genecards.org/cgi-bin/carddisp.pl?gene=EPM2A
APRT	Adenine Phosphoribosyltransferase	Protein Coding	P07741	59	GC16M088810	31.0022	https://www.genecards.org/cgi-bin/carddisp.pl?gene=APRT
PCDH19	Protocadherin 19	Protein Coding	Q8TAB3	56	GC0XM100291	30.9575	https://www.genecards.org/cgi-bin/carddisp.pl?gene=PCDH19
CYCS	Cytochrome C, Somatic	Protein Coding	P99999	61	GC07M025118	30.9177	https://www.genecards.org/cgi-bin/carddisp.pl?gene=CYCS
GYG1	Glycogenin 1	Protein Coding	P46976	59	GC03P148991	30.9163	https://www.genecards.org/cgi-bin/carddisp.pl?gene=GYG1
PRDX1	Peroxiredoxin 1	Protein Coding	Q06830	62	GC01M045790	30.8938	https://www.genecards.org/cgi-bin/carddisp.pl?gene=PRDX1
DPM1	Dolichyl-Phosphate Mannosyltransferase Subunit 1, Catalytic	Protein Coding	O60762	56	GC20M050934	30.8794	https://www.genecards.org/cgi-bin/carddisp.pl?gene=DPM1
EIF2AK3	Eukaryotic Translation Initiation Factor 2 Alpha Kinase 3	Protein Coding	Q9NZJ5	63	GC02M088556	30.8689	https://www.genecards.org/cgi-bin/carddisp.pl?gene=EIF2AK3
TBC1D24	TBC1 Domain Family Member 24	Protein Coding	Q9ULP9	51	GC16P002475	30.8682	https://www.genecards.org/cgi-bin/carddisp.pl?gene=TBC1D24
UMPS	Uridine Monophosphate Synthetase	Protein Coding	P11172	59	GC03P124730	30.8536	https://www.genecards.org/cgi-bin/carddisp.pl?gene=UMPS
ALDH4A1	Aldehyde Dehydrogenase 4 Family Member A1	Protein Coding	P30038	58	GC01M018871	30.7872	https://www.genecards.org/cgi-bin/carddisp.pl?gene=ALDH4A1
MT-ND1	Mitochondrially Encoded NADH:Ubiquinone Oxidoreductase Core Subunit 1	Protein Coding	P03886	45	GCMTP003309	30.7832	https://www.genecards.org/cgi-bin/carddisp.pl?gene=MT-ND1
PCK2	Phosphoenolpyruvate Carboxykinase 2, Mitochondrial	Protein Coding	Q16822	59	GC14P024094	30.7544	https://www.genecards.org/cgi-bin/carddisp.pl?gene=PCK2
DRD4	Dopamine Receptor D4	Protein Coding	P21917	58	GC11P012264	30.7216	https://www.genecards.org/cgi-bin/carddisp.pl?gene=DRD4
RHOA	Ras Homolog Family Member A	Protein Coding	P61586	63	GC03M049359	30.7168	https://www.genecards.org/cgi-bin/carddisp.pl?gene=RHOA
LINC02605	Long Intergenic Non-Protein Coding RNA 2605	RNA Gene		22	GC08P078838	30.7043	https://www.genecards.org/cgi-bin/carddisp.pl?gene=LINC02605
IL13	Interleukin 13	Protein Coding	P35225	57	GC05P132656	30.6708	https://www.genecards.org/cgi-bin/carddisp.pl?gene=IL13
MT-TP	Mitochondrially Encoded TRNA-Pro (CCN)	RNA Gene		17	GCMTM015957	30.6409	https://www.genecards.org/cgi-bin/carddisp.pl?gene=MT-TP
MIR122	MicroRNA 122	RNA Gene		30	GC18P058451	30.6368	https://www.genecards.org/cgi-bin/carddisp.pl?gene=MIR122
LBR	Lamin B Receptor	Protein Coding	Q14739	59	GC01M225401	30.6237	https://www.genecards.org/cgi-bin/carddisp.pl?gene=LBR
BAG3	BAG Cochaperone 3	Protein Coding	O95817	56	GC10P119651	30.5602	https://www.genecards.org/cgi-bin/carddisp.pl?gene=BAG3
GABRG2	Gamma-Aminobutyric Acid Type A Receptor Subunit Gamma2	Protein Coding	P18507	60	GC05P162000	30.5349	https://www.genecards.org/cgi-bin/carddisp.pl?gene=GABRG2
PIK3CD	Phosphatidylinositol-4,5-Bisphosphate 3-Kinase Catalytic Subunit Delta	Protein Coding	O00329	66	GC01P051042	30.4734	https://www.genecards.org/cgi-bin/carddisp.pl?gene=PIK3CD
CD4	CD4 Molecule	Protein Coding	P01730	63	GC12P006786	30.451	https://www.genecards.org/cgi-bin/carddisp.pl?gene=CD4
CD274	CD274 Molecule	Protein Coding	Q9NZQ7	58	GC09P005450	30.359	https://www.genecards.org/cgi-bin/carddisp.pl?gene=CD274
TBK1	TANK Binding Kinase 1	Protein Coding	Q9UHD2	62	GC12P064451	30.3527	https://www.genecards.org/cgi-bin/carddisp.pl?gene=TBK1
HSPG2	Heparan Sulfate Proteoglycan 2	Protein Coding	P98160	60	GC01M021822	30.3343	https://www.genecards.org/cgi-bin/carddisp.pl?gene=HSPG2
FOXO1	Forkhead Box O1	Protein Coding	Q12778	64	GC13M040555	30.3085	https://www.genecards.org/cgi-bin/carddisp.pl?gene=FOXO1
CA2	Carbonic Anhydrase 2	Protein Coding	P00918	64	GC08P085463	30.2569	https://www.genecards.org/cgi-bin/carddisp.pl?gene=CA2
ITGB3	Integrin Subunit Beta 3	Protein Coding	P05106	65	GC17P123264	30.1188	https://www.genecards.org/cgi-bin/carddisp.pl?gene=ITGB3
SPTLC1	Serine Palmitoyltransferase Long Chain Base Subunit 1	Protein Coding	O15269	58	GC09M111277	30.101	https://www.genecards.org/cgi-bin/carddisp.pl?gene=SPTLC1
PHKA2	Phosphorylase Kinase Regulatory Subunit Alpha 2	Protein Coding	P46019	56	GC0XM018892	30.0832	https://www.genecards.org/cgi-bin/carddisp.pl?gene=PHKA2
DPYS	Dihydropyrimidinase	Protein Coding	Q14117	58	GC08M104331	30.0707	https://www.genecards.org/cgi-bin/carddisp.pl?gene=DPYS
CYBA	Cytochrome B-245 Alpha Chain	Protein Coding	P13498	59	GC16M088643	30.0538	https://www.genecards.org/cgi-bin/carddisp.pl?gene=CYBA
SGCE	Sarcoglycan Epsilon	Protein Coding	O43556	55	GC07M094524	30.0096	https://www.genecards.org/cgi-bin/carddisp.pl?gene=SGCE
TLR2	Toll Like Receptor 2	Protein Coding	O60603	65	GC04P153684	29.9998	https://www.genecards.org/cgi-bin/carddisp.pl?gene=TLR2
DRD3	Dopamine Receptor D3	Protein Coding	P35462	57	GC03M114128	29.9574	https://www.genecards.org/cgi-bin/carddisp.pl?gene=DRD3
UCHL1	Ubiquitin C-Terminal Hydrolase L1	Protein Coding	P09936	66	GC04P041256	29.9055	https://www.genecards.org/cgi-bin/carddisp.pl?gene=UCHL1
LMNB1	Lamin B1	Protein Coding	P20700	59	GC05P126776	29.8832	https://www.genecards.org/cgi-bin/carddisp.pl?gene=LMNB1
IFNA1	Interferon Alpha 1	Protein Coding	P01562	51	GC09P021798	29.8719	https://www.genecards.org/cgi-bin/carddisp.pl?gene=IFNA1
IL2RA	Interleukin 2 Receptor Subunit Alpha	Protein Coding	P01589	63	GC10M006010	29.8508	https://www.genecards.org/cgi-bin/carddisp.pl?gene=IL2RA
SNORD15A	Small Nucleolar RNA, C/D Box 15A	RNA Gene		24	GC11P075400	29.8487	https://www.genecards.org/cgi-bin/carddisp.pl?gene=SNORD15A
MIR17	MicroRNA 17	RNA Gene		28	GC13P091350	29.8248	https://www.genecards.org/cgi-bin/carddisp.pl?gene=MIR17
MAPK14	Mitogen-Activated Protein Kinase 14	Protein Coding	Q16539	64	GC06P144902	29.8218	https://www.genecards.org/cgi-bin/carddisp.pl?gene=MAPK14
SFTA3	Surfactant Associated 3	RNA Gene	P0C7M3	44	GC14M036479	29.8103	https://www.genecards.org/cgi-bin/carddisp.pl?gene=SFTA3
DNAH8	Dynein Axonemal Heavy Chain 8	Protein Coding	Q96JB1	51	GC06P144930	29.7694	https://www.genecards.org/cgi-bin/carddisp.pl?gene=DNAH8
CES1	Carboxylesterase 1	Protein Coding	P23141	62	GC16M055836	29.7634	https://www.genecards.org/cgi-bin/carddisp.pl?gene=CES1
PPP1CB	Protein Phosphatase 1 Catalytic Subunit Beta	Protein Coding	P62140	59	GC02P028884	29.7568	https://www.genecards.org/cgi-bin/carddisp.pl?gene=PPP1CB
MIR140	MicroRNA 140	RNA Gene		33	GC16P097800	29.7429	https://www.genecards.org/cgi-bin/carddisp.pl?gene=MIR140
SGCB	Sarcoglycan Beta	Protein Coding	Q16585	52	GC04M052019	29.72	https://www.genecards.org/cgi-bin/carddisp.pl?gene=SGCB
IL18	Interleukin 18	Protein Coding	Q14116	57	GC11M112143	29.7013	https://www.genecards.org/cgi-bin/carddisp.pl?gene=IL18
COG2	Component Of Oligomeric Golgi Complex 2	Protein Coding	Q14746	52	GC01P230642	29.6978	https://www.genecards.org/cgi-bin/carddisp.pl?gene=COG2
CD40	CD40 Molecule	Protein Coding	P25942	63	GC20P046118	29.68	https://www.genecards.org/cgi-bin/carddisp.pl?gene=CD40
OPTN	Optineurin	Protein Coding	Q96CV9	56	GC10P013099	29.6307	https://www.genecards.org/cgi-bin/carddisp.pl?gene=OPTN
COX5A	Cytochrome C Oxidase Subunit 5A	Protein Coding	P20674	56	GC15M074919	29.619	https://www.genecards.org/cgi-bin/carddisp.pl?gene=COX5A
SLC11A2	Solute Carrier Family 11 Member 2	Protein Coding	P49281	61	GC12M050952	29.5465	https://www.genecards.org/cgi-bin/carddisp.pl?gene=SLC11A2
SCARB2	Scavenger Receptor Class B Member 2	Protein Coding	Q14108	58	GC04M076158	29.4675	https://www.genecards.org/cgi-bin/carddisp.pl?gene=SCARB2
ITPA	Inosine Triphosphatase	Protein Coding	Q9BY32	60	GC20P008974	29.4651	https://www.genecards.org/cgi-bin/carddisp.pl?gene=ITPA
SLC4A1	Solute Carrier Family 4 Member 1 (Diego Blood Group)	Protein Coding	P02730	62	GC17M085321	29.4425	https://www.genecards.org/cgi-bin/carddisp.pl?gene=SLC4A1
IL17A	Interleukin 17A	Protein Coding	Q16552	56	GC06P052186	29.4309	https://www.genecards.org/cgi-bin/carddisp.pl?gene=IL17A
PCNA	Proliferating Cell Nuclear Antigen	Protein Coding	P12004	63	GC20M005114	29.4297	https://www.genecards.org/cgi-bin/carddisp.pl?gene=PCNA
PON2	Paraoxonase 2	Protein Coding	Q15165	56	GC07M095404	29.3962	https://www.genecards.org/cgi-bin/carddisp.pl?gene=PON2
ITM2B	Integral Membrane Protein 2B	Protein Coding	Q9Y287	56	GC13P048233	29.3837	https://www.genecards.org/cgi-bin/carddisp.pl?gene=ITM2B
MIR30A	MicroRNA 30a	RNA Gene		28	GC06M071403	29.3792	https://www.genecards.org/cgi-bin/carddisp.pl?gene=MIR30A
MAF	MAF BZIP Transcription Factor	Protein Coding	O75444	58	GC16M079204	29.3725	https://www.genecards.org/cgi-bin/carddisp.pl?gene=MAF
DNA2	DNA Replication Helicase/Nuclease 2	Protein Coding	P51530	53	GC10M068414	29.3443	https://www.genecards.org/cgi-bin/carddisp.pl?gene=DNA2
NGF	Nerve Growth Factor	Protein Coding	P01138	64	GC01M115285	29.2839	https://www.genecards.org/cgi-bin/carddisp.pl?gene=NGF
NFKB2	Nuclear Factor Kappa B Subunit 2	Protein Coding	Q00653	66	GC10P102394	29.2602	https://www.genecards.org/cgi-bin/carddisp.pl?gene=NFKB2
MAPK8	Mitogen-Activated Protein Kinase 8	Protein Coding	P45983	62	GC10P048306	29.2242	https://www.genecards.org/cgi-bin/carddisp.pl?gene=MAPK8
MIR27A	MicroRNA 27a	RNA Gene		32	GC19M096311	29.1826	https://www.genecards.org/cgi-bin/carddisp.pl?gene=MIR27A
CREB1	CAMP Responsive Element Binding Protein 1	Protein Coding	P16220	63	GC02P207529	29.1277	https://www.genecards.org/cgi-bin/carddisp.pl?gene=CREB1
TFAM	Transcription Factor A, Mitochondrial	Protein Coding	Q00059	58	GC10P058385	29.1202	https://www.genecards.org/cgi-bin/carddisp.pl?gene=TFAM
BCKDHA	Branched Chain Keto Acid Dehydrogenase E1 Subunit Alpha	Protein Coding	P12694	56	GC19P123113	29.1142	https://www.genecards.org/cgi-bin/carddisp.pl?gene=BCKDHA
PRKG1	Protein Kinase CGMP-Dependent 1	Protein Coding	Q13976	63	GC10P050991	29.0782	https://www.genecards.org/cgi-bin/carddisp.pl?gene=PRKG1
HNRNPA1	Heterogeneous Nuclear Ribonucleoprotein A1	Protein Coding	P09651	60	GC12P054280	29.0594	https://www.genecards.org/cgi-bin/carddisp.pl?gene=HNRNPA1
LOC110806262	Solute Carrier Family 6 Member 4 Gene Promoter	Functional Element		8	GC17P030235	29.0359	https://www.genecards.org/cgi-bin/carddisp.pl?gene=LOC110806262
LONP1	Lon Peptidase 1, Mitochondrial	Protein Coding	P36776	58	GC19M005691	29.0353	https://www.genecards.org/cgi-bin/carddisp.pl?gene=LONP1
SCN1B	Sodium Voltage-Gated Channel Beta Subunit 1	Protein Coding	Q07699	58	GC19P035030	29.0182	https://www.genecards.org/cgi-bin/carddisp.pl?gene=SCN1B
ACVRL1	Activin A Receptor Like Type 1	Protein Coding	P37023	63	GC12P051906	29.0131	https://www.genecards.org/cgi-bin/carddisp.pl?gene=ACVRL1
SLC1A3	Solute Carrier Family 1 Member 3	Protein Coding	P43003	62	GC05P036702	28.9922	https://www.genecards.org/cgi-bin/carddisp.pl?gene=SLC1A3
DPAGT1	Dolichyl-Phosphate N-Acetylglucosaminephosphotransferase 1	Protein Coding	Q9H3H5	56	GC11M130189	28.986	https://www.genecards.org/cgi-bin/carddisp.pl?gene=DPAGT1
ACO2	Aconitase 2	Protein Coding	Q99798	59	GC22P076167	28.9838	https://www.genecards.org/cgi-bin/carddisp.pl?gene=ACO2
FN1	Fibronectin 1	Protein Coding	P02751	63	GC02M215360	28.9277	https://www.genecards.org/cgi-bin/carddisp.pl?gene=FN1
RAG2	Recombination Activating 2	Protein Coding	P55895	52	GC11M036575	28.9048	https://www.genecards.org/cgi-bin/carddisp.pl?gene=RAG2
PHYH	Phytanoyl-CoA 2-Hydroxylase	Protein Coding	O14832	57	GC10M013277	28.8617	https://www.genecards.org/cgi-bin/carddisp.pl?gene=PHYH
FLCN	Folliculin	Protein Coding	Q8NFG4	55	GC17M017212	28.8553	https://www.genecards.org/cgi-bin/carddisp.pl?gene=FLCN
COL4A3	Collagen Type IV Alpha 3 Chain	Protein Coding	Q01955	59	GC02P227164	28.8027	https://www.genecards.org/cgi-bin/carddisp.pl?gene=COL4A3
BCL2L1	BCL2 Like 1	Protein Coding	Q07817	62	GC20M031664	28.7622	https://www.genecards.org/cgi-bin/carddisp.pl?gene=BCL2L1
SCARB1	Scavenger Receptor Class B Member 1	Protein Coding	Q8WTV0	60	GC12M124776	28.7227	https://www.genecards.org/cgi-bin/carddisp.pl?gene=SCARB1
BMP1	Bone Morphogenetic Protein 1	Protein Coding	P13497	62	GC08P022165	28.6394	https://www.genecards.org/cgi-bin/carddisp.pl?gene=BMP1
ITGB2	Integrin Subunit Beta 2	Protein Coding	P05107	63	GC21M044885	28.5764	https://www.genecards.org/cgi-bin/carddisp.pl?gene=ITGB2
FGF2	Fibroblast Growth Factor 2	Protein Coding	P09038	59	GC04P122826	28.5641	https://www.genecards.org/cgi-bin/carddisp.pl?gene=FGF2
RNASEH2A	Ribonuclease H2 Subunit A	Protein Coding	O75792	56	GC19P122442	28.5456	https://www.genecards.org/cgi-bin/carddisp.pl?gene=RNASEH2A
GATM	Glycine Amidinotransferase	Protein Coding	P50440	58	GC15M045361	28.5372	https://www.genecards.org/cgi-bin/carddisp.pl?gene=GATM
GALNT3	Polypeptide N-Acetylgalactosaminyltransferase 3	Protein Coding	Q14435	58	GC02M165747	28.4985	https://www.genecards.org/cgi-bin/carddisp.pl?gene=GALNT3
CSNK2A1	Casein Kinase 2 Alpha 1	Protein Coding	P68400	63	GC20M000472	28.488	https://www.genecards.org/cgi-bin/carddisp.pl?gene=CSNK2A1
MANBA	Mannosidase Beta	Protein Coding	O00462	55	GC04M102631	28.4642	https://www.genecards.org/cgi-bin/carddisp.pl?gene=MANBA
CD44	CD44 Molecule (IN Blood Group)	Protein Coding	P16070	62	GC11P035139	28.4247	https://www.genecards.org/cgi-bin/carddisp.pl?gene=CD44
PHOX2B	Paired Like Homeobox 2B	Protein Coding	Q99453	57	GC04M041746	28.4113	https://www.genecards.org/cgi-bin/carddisp.pl?gene=PHOX2B
GPT2	Glutamic--Pyruvic Transaminase 2	Protein Coding	Q8TD30	58	GC16P097033	28.4008	https://www.genecards.org/cgi-bin/carddisp.pl?gene=GPT2
KDR	Kinase Insert Domain Receptor	Protein Coding	P35968	67	GC04M055078	28.3947	https://www.genecards.org/cgi-bin/carddisp.pl?gene=KDR
B4GALT7	Beta-1,4-Galactosyltransferase 7	Protein Coding	Q9UBV7	53	GC05P177600	28.3933	https://www.genecards.org/cgi-bin/carddisp.pl?gene=B4GALT7
HTRA2	HtrA Serine Peptidase 2	Protein Coding	O43464	59	GC02P074529	28.3912	https://www.genecards.org/cgi-bin/carddisp.pl?gene=HTRA2
CD8A	CD8 Subunit Alpha	Protein Coding	P01732	60	GC02M086784	28.3876	https://www.genecards.org/cgi-bin/carddisp.pl?gene=CD8A
MDH2	Malate Dehydrogenase 2	Protein Coding	P40926	60	GC07P076048	28.3864	https://www.genecards.org/cgi-bin/carddisp.pl?gene=MDH2
GSK3B	Glycogen Synthase Kinase 3 Beta	Protein Coding	P49841	64	GC03M119821	28.348	https://www.genecards.org/cgi-bin/carddisp.pl?gene=GSK3B
CACNA1G	Calcium Voltage-Gated Channel Subunit Alpha1 G	Protein Coding	O43497	62	GC17P123374	28.3455	https://www.genecards.org/cgi-bin/carddisp.pl?gene=CACNA1G
PNKD	PNKD Metallo-Beta-Lactamase Domain Containing	Protein Coding	Q8N490	54	GC02P218270	28.3148	https://www.genecards.org/cgi-bin/carddisp.pl?gene=PNKD
TOR1A	Torsin Family 1 Member A	Protein Coding	O14656	59	GC09M129812	28.2698	https://www.genecards.org/cgi-bin/carddisp.pl?gene=TOR1A
ELANE	Elastase, Neutrophil Expressed	Protein Coding	P08246	64	GC19P121813	28.2573	https://www.genecards.org/cgi-bin/carddisp.pl?gene=ELANE
ALAD	Aminolevulinate Dehydratase	Protein Coding	P13716	59	GC09M113386	28.2336	https://www.genecards.org/cgi-bin/carddisp.pl?gene=ALAD
SLC11A1	Solute Carrier Family 11 Member 1	Protein Coding	P49279	59	GC02P218382	28.1725	https://www.genecards.org/cgi-bin/carddisp.pl?gene=SLC11A1
BIRC5	Baculoviral IAP Repeat Containing 5	Protein Coding	O15392	59	GC17P078214	28.1245	https://www.genecards.org/cgi-bin/carddisp.pl?gene=BIRC5
KNG1	Kininogen 1	Protein Coding	P01042	60	GC03P186717	28.1238	https://www.genecards.org/cgi-bin/carddisp.pl?gene=KNG1
MYH14	Myosin Heavy Chain 14	Protein Coding	Q7Z406	58	GC19P123471	28.1049	https://www.genecards.org/cgi-bin/carddisp.pl?gene=MYH14
MICU1	Mitochondrial Calcium Uptake 1	Protein Coding	Q9BPX6	55	GC10M072367	28.0856	https://www.genecards.org/cgi-bin/carddisp.pl?gene=MICU1
CHKB-CPT1B	CHKB-CPT1B Readthrough (NMD Candidate)	RNA Gene		26	GC22M050568	28.0654	https://www.genecards.org/cgi-bin/carddisp.pl?gene=CHKB-CPT1B
KCNT1	Potassium Sodium-Activated Channel Subfamily T Member 1	Protein Coding	Q5JUK3	54	GC09P135702	28.0461	https://www.genecards.org/cgi-bin/carddisp.pl?gene=KCNT1
CCR5	C-C Motif Chemokine Receptor 5	Protein Coding	P51681	60	GC03P059720	28.0119	https://www.genecards.org/cgi-bin/carddisp.pl?gene=CCR5
MIR146B	MicroRNA 146b	RNA Gene		31	GC10P102436	27.9898	https://www.genecards.org/cgi-bin/carddisp.pl?gene=MIR146B
GNAO1	G Protein Subunit Alpha O1	Protein Coding	P09471	59	GC16P097311	27.9795	https://www.genecards.org/cgi-bin/carddisp.pl?gene=GNAO1
PRKAA1	Protein Kinase AMP-Activated Catalytic Subunit Alpha 1	Protein Coding	Q13131	60	GC05M040759	27.975	https://www.genecards.org/cgi-bin/carddisp.pl?gene=PRKAA1
PLG	Plasminogen	Protein Coding	P00747	62	GC06P160702	27.9693	https://www.genecards.org/cgi-bin/carddisp.pl?gene=PLG
YY1	YY1 Transcription Factor	Protein Coding	P25490	61	GC14P100238	27.9611	https://www.genecards.org/cgi-bin/carddisp.pl?gene=YY1
JUP	Junction Plakoglobin	Protein Coding	P14923	62	GC17M041754	27.9245	https://www.genecards.org/cgi-bin/carddisp.pl?gene=JUP
THBS1	Thrombospondin 1	Protein Coding	P07996	59	GC15P039581	27.8023	https://www.genecards.org/cgi-bin/carddisp.pl?gene=THBS1
SHANK3	SH3 And Multiple Ankyrin Repeat Domains 3	Protein Coding	Q9BYB0	52	GC22P076396	27.7723	https://www.genecards.org/cgi-bin/carddisp.pl?gene=SHANK3
GSN	Gelsolin	Protein Coding	P06396	62	GC09P121201	27.6975	https://www.genecards.org/cgi-bin/carddisp.pl?gene=GSN
MIR34C	MicroRNA 34c	RNA Gene		31	GC11P112585	27.691	https://www.genecards.org/cgi-bin/carddisp.pl?gene=MIR34C
TPO	Thyroid Peroxidase	Protein Coding	P07202	60	GC02P001374	27.6715	https://www.genecards.org/cgi-bin/carddisp.pl?gene=TPO
PDCD1	Programmed Cell Death 1	Protein Coding	Q15116	60	GC02M241849	27.6645	https://www.genecards.org/cgi-bin/carddisp.pl?gene=PDCD1
ABCA7	ATP Binding Cassette Subfamily A Member 7	Protein Coding	Q8IZY2	58	GC19P121826	27.6211	https://www.genecards.org/cgi-bin/carddisp.pl?gene=ABCA7
GHR	Growth Hormone Receptor	Protein Coding	P10912	59	GC05P042429	27.5324	https://www.genecards.org/cgi-bin/carddisp.pl?gene=GHR
DDX3X	DEAD-Box Helicase 3 X-Linked	Protein Coding	O00571	62	GC0XP041333	27.472	https://www.genecards.org/cgi-bin/carddisp.pl?gene=DDX3X
CTH	Cystathionine Gamma-Lyase	Protein Coding	P32929	62	GC01P070411	27.4316	https://www.genecards.org/cgi-bin/carddisp.pl?gene=CTH
BMPR1A	Bone Morphogenetic Protein Receptor Type 1A	Protein Coding	P36894	64	GC10P112550	27.4247	https://www.genecards.org/cgi-bin/carddisp.pl?gene=BMPR1A
B3GAT3	Beta-1,3-Glucuronyltransferase 3	Protein Coding	O94766	56	GC11M128850	27.4218	https://www.genecards.org/cgi-bin/carddisp.pl?gene=B3GAT3
FECH	Ferrochelatase	Protein Coding	P22830	60	GC18M057544	27.416	https://www.genecards.org/cgi-bin/carddisp.pl?gene=FECH
SNORD118	Small Nucleolar RNA, C/D Box 118	RNA Gene		28	GC17M084187	27.4096	https://www.genecards.org/cgi-bin/carddisp.pl?gene=SNORD118
LCT	Lactase	Protein Coding	P09848	55	GC02M135787	27.4074	https://www.genecards.org/cgi-bin/carddisp.pl?gene=LCT
DNAJC5	DnaJ Heat Shock Protein Family (Hsp40) Member C5	Protein Coding	Q9H3Z4	54	GC20P063895	27.3907	https://www.genecards.org/cgi-bin/carddisp.pl?gene=DNAJC5
PLAT	Plasminogen Activator, Tissue Type	Protein Coding	P00750	62	GC08M042174	27.3381	https://www.genecards.org/cgi-bin/carddisp.pl?gene=PLAT
B4GALT1	Beta-1,4-Galactosyltransferase 1	Protein Coding	P15291	59	GC09M033100	27.266	https://www.genecards.org/cgi-bin/carddisp.pl?gene=B4GALT1
PNPT1	Polyribonucleotide Nucleotidyltransferase 1	Protein Coding	Q8TCS8	56	GC02M055634	27.238	https://www.genecards.org/cgi-bin/carddisp.pl?gene=PNPT1
HSPA4	Heat Shock Protein Family A (Hsp70) Member 4	Protein Coding	P34932	56	GC05P133062	27.2362	https://www.genecards.org/cgi-bin/carddisp.pl?gene=HSPA4
BCR	BCR Activator Of RhoGEF And GTPase	Protein Coding	P11274	65	GC22P023179	27.2226	https://www.genecards.org/cgi-bin/carddisp.pl?gene=BCR
SLC25A3	Solute Carrier Family 25 Member 3	Protein Coding	Q00325	57	GC12P098593	27.1962	https://www.genecards.org/cgi-bin/carddisp.pl?gene=SLC25A3
FOXO3	Forkhead Box O3	Protein Coding	O43524	60	GC06P108559	27.1359	https://www.genecards.org/cgi-bin/carddisp.pl?gene=FOXO3
NHLRC1	NHL Repeat Containing E3 Ubiquitin Protein Ligase 1	Protein Coding	Q6VVB1	52	GC06M018120	27.1165	https://www.genecards.org/cgi-bin/carddisp.pl?gene=NHLRC1
PITX2	Paired Like Homeodomain 2	Protein Coding	Q99697	59	GC04M110617	27.109	https://www.genecards.org/cgi-bin/carddisp.pl?gene=PITX2
TMEM165	Transmembrane Protein 165	Protein Coding	Q9HC07	52	GC04P055395	27.1013	https://www.genecards.org/cgi-bin/carddisp.pl?gene=TMEM165
NAMPT	Nicotinamide Phosphoribosyltransferase	Protein Coding	P43490	60	GC07M106248	27.05	https://www.genecards.org/cgi-bin/carddisp.pl?gene=NAMPT
SREBF2	Sterol Regulatory Element Binding Transcription Factor 2	Protein Coding	Q12772	56	GC22P041833	26.9917	https://www.genecards.org/cgi-bin/carddisp.pl?gene=SREBF2
TIMM8A	Translocase Of Inner Mitochondrial Membrane 8A	Protein Coding	O60220	54	GC0XM101345	26.9424	https://www.genecards.org/cgi-bin/carddisp.pl?gene=TIMM8A
TP73	Tumor Protein P73	Protein Coding	O15350	58	GC01P003652	26.928	https://www.genecards.org/cgi-bin/carddisp.pl?gene=TP73
GABRB3	Gamma-Aminobutyric Acid Type A Receptor Subunit Beta3	Protein Coding	P28472	61	GC15M026543	26.9258	https://www.genecards.org/cgi-bin/carddisp.pl?gene=GABRB3
CDK2	Cyclin Dependent Kinase 2	Protein Coding	P24941	64	GC12P055966	26.8847	https://www.genecards.org/cgi-bin/carddisp.pl?gene=CDK2
GALNT2	Polypeptide N-Acetylgalactosaminyltransferase 2	Protein Coding	Q10471	56	GC01P230057	26.8671	https://www.genecards.org/cgi-bin/carddisp.pl?gene=GALNT2
B3GALT6	Beta-1,3-Galactosyltransferase 6	Protein Coding	Q96L58	51	GC01P001232	26.8502	https://www.genecards.org/cgi-bin/carddisp.pl?gene=B3GALT6
CASP9	Caspase 9	Protein Coding	P55211	60	GC01M015507	26.8318	https://www.genecards.org/cgi-bin/carddisp.pl?gene=CASP9
RNASEH1	Ribonuclease H1	Protein Coding	O60930	56	GC02M004568	26.8243	https://www.genecards.org/cgi-bin/carddisp.pl?gene=RNASEH1
MID1	Midline 1	Protein Coding	O15344	55	GC0XM010445	26.798	https://www.genecards.org/cgi-bin/carddisp.pl?gene=MID1
IAPP	Islet Amyloid Polypeptide	Protein Coding	P10997	52	GC12P021354	26.7943	https://www.genecards.org/cgi-bin/carddisp.pl?gene=IAPP
UGT1A4	UDP Glucuronosyltransferase Family 1 Member A4	Protein Coding	P22310	55	GC02P233718	26.7295	https://www.genecards.org/cgi-bin/carddisp.pl?gene=UGT1A4
CACNA1H	Calcium Voltage-Gated Channel Subunit Alpha1 H	Protein Coding	O95180	61	GC16P001153	26.6898	https://www.genecards.org/cgi-bin/carddisp.pl?gene=CACNA1H
HNRNPA2B1	Heterogeneous Nuclear Ribonucleoprotein A2/B1	Protein Coding	P22626	59	GC07M026174	26.6747	https://www.genecards.org/cgi-bin/carddisp.pl?gene=HNRNPA2B1
PPP2R1A	Protein Phosphatase 2 Scaffold Subunit Aalpha	Protein Coding	P30153	60	GC19P123559	26.6633	https://www.genecards.org/cgi-bin/carddisp.pl?gene=PPP2R1A
EIF2AK2	Eukaryotic Translation Initiation Factor 2 Alpha Kinase 2	Protein Coding	P19525	63	GC02M037099	26.6574	https://www.genecards.org/cgi-bin/carddisp.pl?gene=EIF2AK2
HSP90AA1	Heat Shock Protein 90 Alpha Family Class A Member 1	Protein Coding	P07900	64	GC14M102080	26.6471	https://www.genecards.org/cgi-bin/carddisp.pl?gene=HSP90AA1
SYP	Synaptophysin	Protein Coding	P08247	59	GC0XM049187	26.6359	https://www.genecards.org/cgi-bin/carddisp.pl?gene=SYP
UGT1A3	UDP Glucuronosyltransferase Family 1 Member A3	Protein Coding	P35503	50	GC02P233729	26.634	https://www.genecards.org/cgi-bin/carddisp.pl?gene=UGT1A3
RPS6KA3	Ribosomal Protein S6 Kinase A3	Protein Coding	P51812	66	GC0XM020149	26.5899	https://www.genecards.org/cgi-bin/carddisp.pl?gene=RPS6KA3
SERPINF1	Serpin Family F Member 1	Protein Coding	P36955	58	GC17P121622	26.565	https://www.genecards.org/cgi-bin/carddisp.pl?gene=SERPINF1
ATXN2	Ataxin 2	Protein Coding	Q99700	56	GC12M111443	26.5484	https://www.genecards.org/cgi-bin/carddisp.pl?gene=ATXN2
DLEU2	Deleted In Lymphocytic Leukemia 2	RNA Gene		31	GC13M049913	26.4976	https://www.genecards.org/cgi-bin/carddisp.pl?gene=DLEU2
HP	Haptoglobin	Protein Coding	P00738	58	GC16P097888	26.4281	https://www.genecards.org/cgi-bin/carddisp.pl?gene=HP
PPM1K	Protein Phosphatase, Mg2+/Mn2+ Dependent 1K	Protein Coding	Q8N3J5	53	GC04M088258	26.4232	https://www.genecards.org/cgi-bin/carddisp.pl?gene=PPM1K
SLC34A1	Solute Carrier Family 34 Member 1	Protein Coding	Q06495	56	GC05P187593	26.3594	https://www.genecards.org/cgi-bin/carddisp.pl?gene=SLC34A1
RAD50	RAD50 Double Strand Break Repair Protein	Protein Coding	Q92878	63	GC05P132556	26.358	https://www.genecards.org/cgi-bin/carddisp.pl?gene=RAD50
CSF2	Colony Stimulating Factor 2	Protein Coding	P04141	58	GC05P132073	26.3509	https://www.genecards.org/cgi-bin/carddisp.pl?gene=CSF2
PLCG2	Phospholipase C Gamma 2	Protein Coding	P16885	64	GC16P081779	26.3474	https://www.genecards.org/cgi-bin/carddisp.pl?gene=PLCG2
NOS1	Nitric Oxide Synthase 1	Protein Coding	P29475	62	GC12M117208	26.3458	https://www.genecards.org/cgi-bin/carddisp.pl?gene=NOS1
ANGPTL4	Angiopoietin Like 4	Protein Coding	Q9BY76	57	GC19P008363	26.3198	https://www.genecards.org/cgi-bin/carddisp.pl?gene=ANGPTL4
SCARNA5	Small Cajal Body-Specific RNA 5	RNA Gene		28	GC02P233275	26.2994	https://www.genecards.org/cgi-bin/carddisp.pl?gene=SCARNA5
KCNJ5	Potassium Inwardly Rectifying Channel Subfamily J Member 5	Protein Coding	P48544	59	GC11P128891	26.2274	https://www.genecards.org/cgi-bin/carddisp.pl?gene=KCNJ5
XIAP	X-Linked Inhibitor Of Apoptosis	Protein Coding	P98170	64	GC0XP123859	26.2259	https://www.genecards.org/cgi-bin/carddisp.pl?gene=XIAP
MAOB	Monoamine Oxidase B	Protein Coding	P27338	56	GC0XM043766	26.2197	https://www.genecards.org/cgi-bin/carddisp.pl?gene=MAOB
KIF5A	Kinesin Family Member 5A	Protein Coding	Q12840	58	GC12P062080	26.2157	https://www.genecards.org/cgi-bin/carddisp.pl?gene=KIF5A
FOXP2	Forkhead Box P2	Protein Coding	O15409	56	GC07P114086	26.1868	https://www.genecards.org/cgi-bin/carddisp.pl?gene=FOXP2
ATF4	Activating Transcription Factor 4	Protein Coding	P18848	59	GC22P039519	26.0909	https://www.genecards.org/cgi-bin/carddisp.pl?gene=ATF4
CASP1	Caspase 1	Protein Coding	P29466	62	GC11M105025	26.0709	https://www.genecards.org/cgi-bin/carddisp.pl?gene=CASP1
MMP3	Matrix Metallopeptidase 3	Protein Coding	P08254	63	GC11M102835	26.0265	https://www.genecards.org/cgi-bin/carddisp.pl?gene=MMP3
SULT1A1	Sulfotransferase Family 1A Member 1	Protein Coding	P50225	55	GC16M044696	25.9907	https://www.genecards.org/cgi-bin/carddisp.pl?gene=SULT1A1
SERPINC1	Serpin Family C Member 1	Protein Coding	P01008	63	GC01M175000	25.9273	https://www.genecards.org/cgi-bin/carddisp.pl?gene=SERPINC1
CCL5	C-C Motif Chemokine Ligand 5	Protein Coding	P13501	56	GC17M035871	25.9188	https://www.genecards.org/cgi-bin/carddisp.pl?gene=CCL5
KCNJ2	Potassium Inwardly Rectifying Channel Subfamily J Member 2	Protein Coding	P63252	61	GC17P070168	25.8506	https://www.genecards.org/cgi-bin/carddisp.pl?gene=KCNJ2
GRM1	Glutamate Metabotropic Receptor 1	Protein Coding	Q13255	63	GC06P148246	25.8421	https://www.genecards.org/cgi-bin/carddisp.pl?gene=GRM1
MIR142	MicroRNA 142	RNA Gene		31	GC17M058331	25.8095	https://www.genecards.org/cgi-bin/carddisp.pl?gene=MIR142
BMPR2	Bone Morphogenetic Protein Receptor Type 2	Protein Coding	Q13873	63	GC02P202376	25.7791	https://www.genecards.org/cgi-bin/carddisp.pl?gene=BMPR2
AASS	Aminoadipate-Semialdehyde Synthase	Protein Coding	Q9UDR5	54	GC07M122073	25.7496	https://www.genecards.org/cgi-bin/carddisp.pl?gene=AASS
GABRA1	Gamma-Aminobutyric Acid Type A Receptor Subunit Alpha1	Protein Coding	P14867	60	GC05P161847	25.7412	https://www.genecards.org/cgi-bin/carddisp.pl?gene=GABRA1
PLAU	Plasminogen Activator, Urokinase	Protein Coding	P00749	64	GC10P073909	25.7288	https://www.genecards.org/cgi-bin/carddisp.pl?gene=PLAU
STIM1	Stromal Interaction Molecule 1	Protein Coding	Q13586	62	GC11P012431	25.7153	https://www.genecards.org/cgi-bin/carddisp.pl?gene=STIM1
TGIF1	TGFB Induced Factor Homeobox 1	Protein Coding	Q15583	58	GC18P003411	25.712	https://www.genecards.org/cgi-bin/carddisp.pl?gene=TGIF1
MIF	Macrophage Migration Inhibitory Factor	Protein Coding	P14174	60	GC22P023894	25.6807	https://www.genecards.org/cgi-bin/carddisp.pl?gene=MIF
SST	Somatostatin	Protein Coding	P61278	53	GC03M187668	25.6749	https://www.genecards.org/cgi-bin/carddisp.pl?gene=SST
CALR	Calreticulin	Protein Coding	P27797	64	GC19P012938	25.6553	https://www.genecards.org/cgi-bin/carddisp.pl?gene=CALR
EGR1	Early Growth Response 1	Protein Coding	P18146	58	GC05P138465	25.6337	https://www.genecards.org/cgi-bin/carddisp.pl?gene=EGR1
PROM1	Prominin 1	Protein Coding	O43490	59	GC04M015965	25.6326	https://www.genecards.org/cgi-bin/carddisp.pl?gene=PROM1
COL18A1	Collagen Type XVIII Alpha 1 Chain	Protein Coding	P39060	59	GC21P045405	25.6318	https://www.genecards.org/cgi-bin/carddisp.pl?gene=COL18A1
PRKACA	Protein Kinase CAMP-Activated Catalytic Subunit Alpha	Protein Coding	P17612	66	GC19M096319	25.5652	https://www.genecards.org/cgi-bin/carddisp.pl?gene=PRKACA
TRA-TGC7-1	TRNA-Ala (Anticodon TGC) 7-1	RNA Gene		15	GC06M096896	25.5623	https://www.genecards.org/cgi-bin/carddisp.pl?gene=TRA-TGC7-1
ADAMTS13	ADAM Metallopeptidase With Thrombospondin Type 1 Motif 13	Protein Coding	Q76LX8	61	GC09P133414	25.5142	https://www.genecards.org/cgi-bin/carddisp.pl?gene=ADAMTS13
MAPK10	Mitogen-Activated Protein Kinase 10	Protein Coding	P53779	60	GC04M085990	25.476	https://www.genecards.org/cgi-bin/carddisp.pl?gene=MAPK10
CALM1	Calmodulin 1	Protein Coding	P0DP23	59	GC14P090396	25.4737	https://www.genecards.org/cgi-bin/carddisp.pl?gene=CALM1
ANTXR2	ANTXR Cell Adhesion Molecule 2	Protein Coding	P58335	58	GC04M079901	25.4694	https://www.genecards.org/cgi-bin/carddisp.pl?gene=ANTXR2
FDFT1	Farnesyl-Diphosphate Farnesyltransferase 1	Protein Coding	P37268	58	GC08P011795	25.4535	https://www.genecards.org/cgi-bin/carddisp.pl?gene=FDFT1
PRKRA	Protein Activator Of Interferon Induced Protein Kinase EIF2AK2	Protein Coding	O75569	55	GC02M178431	25.4499	https://www.genecards.org/cgi-bin/carddisp.pl?gene=PRKRA
SLC18A2	Solute Carrier Family 18 Member A2	Protein Coding	Q05940	60	GC10P117241	25.3898	https://www.genecards.org/cgi-bin/carddisp.pl?gene=SLC18A2
ITGAM	Integrin Subunit Alpha M	Protein Coding	P11215	61	GC16P096773	25.3845	https://www.genecards.org/cgi-bin/carddisp.pl?gene=ITGAM
MIR29A	MicroRNA 29a	RNA Gene		31	GC07M130876	25.3836	https://www.genecards.org/cgi-bin/carddisp.pl?gene=MIR29A
HCRT	Hypocretin Neuropeptide Precursor	Protein Coding	O43612	52	GC17M085215	25.3831	https://www.genecards.org/cgi-bin/carddisp.pl?gene=HCRT
ITGA2B	Integrin Subunit Alpha 2b	Protein Coding	P08514	64	GC17M085327	25.3474	https://www.genecards.org/cgi-bin/carddisp.pl?gene=ITGA2B
RHO	Rhodopsin	Protein Coding	P08100	60	GC03P140025	25.279	https://www.genecards.org/cgi-bin/carddisp.pl?gene=RHO
CD46	CD46 Molecule	Protein Coding	P15529	60	GC01P207752	25.2556	https://www.genecards.org/cgi-bin/carddisp.pl?gene=CD46
REST	RE1 Silencing Transcription Factor	Protein Coding	Q13127	56	GC04P056907	25.2454	https://www.genecards.org/cgi-bin/carddisp.pl?gene=REST
SIGMAR1	Sigma Non-Opioid Intracellular Receptor 1	Protein Coding	Q99720	59	GC09M034634	25.239	https://www.genecards.org/cgi-bin/carddisp.pl?gene=SIGMAR1
BECN1	Beclin 1	Protein Coding	Q14457	59	GC17M042810	25.2032	https://www.genecards.org/cgi-bin/carddisp.pl?gene=BECN1
H6PD	Hexose-6-Phosphate Dehydrogenase/Glucose 1-Dehydrogenase	Protein Coding	O95479	56	GC01P009234	25.1912	https://www.genecards.org/cgi-bin/carddisp.pl?gene=H6PD
FHIT	Fragile Histidine Triad Diadenosine Triphosphatase	Protein Coding	P49789	56	GC03M059747	25.1869	https://www.genecards.org/cgi-bin/carddisp.pl?gene=FHIT
OGDH	Oxoglutarate Dehydrogenase	Protein Coding	Q02218	59	GC07P044606	25.1033	https://www.genecards.org/cgi-bin/carddisp.pl?gene=OGDH
LTA	Lymphotoxin Alpha	Protein Coding	P01374	55	GC06P144762	25.1001	https://www.genecards.org/cgi-bin/carddisp.pl?gene=LTA
MIR223	MicroRNA 223	RNA Gene		30	GC0XP066018	25.0669	https://www.genecards.org/cgi-bin/carddisp.pl?gene=MIR223
C9orf72	C9orf72-SMCR8 Complex Subunit	Protein Coding	Q96LT7	54	GC09M029743	25.0512	https://www.genecards.org/cgi-bin/carddisp.pl?gene=C9orf72
OGT	O-Linked N-Acetylglucosamine (GlcNAc) Transferase	Protein Coding	O15294	59	GC0XP071800	24.9929	https://www.genecards.org/cgi-bin/carddisp.pl?gene=OGT
HELLS	Helicase, Lymphoid Specific	Protein Coding	Q9NRZ9	57	GC10P112737	24.9543	https://www.genecards.org/cgi-bin/carddisp.pl?gene=HELLS
SLC10A1	Solute Carrier Family 10 Member 1	Protein Coding	Q14973	55	GC14M069775	24.9128	https://www.genecards.org/cgi-bin/carddisp.pl?gene=SLC10A1
SLC5A1	Solute Carrier Family 5 Member 1	Protein Coding	P13866	60	GC22P032043	24.8955	https://www.genecards.org/cgi-bin/carddisp.pl?gene=SLC5A1
MGP	Matrix Gla Protein	Protein Coding	P08493	56	GC12M030917	24.8579	https://www.genecards.org/cgi-bin/carddisp.pl?gene=MGP
UBQLN2	Ubiquilin 2	Protein Coding	Q9UHD9	55	GC0XP056563	24.8574	https://www.genecards.org/cgi-bin/carddisp.pl?gene=UBQLN2
SCO1	Synthesis Of Cytochrome C Oxidase 1	Protein Coding	O75880	58	GC17M010672	24.8243	https://www.genecards.org/cgi-bin/carddisp.pl?gene=SCO1
HSPA8	Heat Shock Protein Family A (Hsp70) Member 8	Protein Coding	P11142	62	GC11M123057	24.7778	https://www.genecards.org/cgi-bin/carddisp.pl?gene=HSPA8
RNF216	Ring Finger Protein 216	Protein Coding	Q9NWF9	55	GC07M005620	24.7744	https://www.genecards.org/cgi-bin/carddisp.pl?gene=RNF216
CDK1	Cyclin Dependent Kinase 1	Protein Coding	P06493	61	GC10P060772	24.7678	https://www.genecards.org/cgi-bin/carddisp.pl?gene=CDK1
NMNAT1	Nicotinamide Nucleotide Adenylyltransferase 1	Protein Coding	Q9HAN9	60	GC01P051116	24.7155	https://www.genecards.org/cgi-bin/carddisp.pl?gene=NMNAT1
HK2	Hexokinase 2	Protein Coding	P52789	59	GC02P075073	24.7107	https://www.genecards.org/cgi-bin/carddisp.pl?gene=HK2
SLC1A2	Solute Carrier Family 1 Member 2	Protein Coding	P43004	63	GC11M035267	24.6506	https://www.genecards.org/cgi-bin/carddisp.pl?gene=SLC1A2
UCP1	Uncoupling Protein 1	Protein Coding	P25874	56	GC04M140559	24.5825	https://www.genecards.org/cgi-bin/carddisp.pl?gene=UCP1
ANXA5	Annexin A5	Protein Coding	P08758	60	GC04M121667	24.5587	https://www.genecards.org/cgi-bin/carddisp.pl?gene=ANXA5
CEL	Carboxyl Ester Lipase	Protein Coding	P19835	57	GC09P133061	24.5476	https://www.genecards.org/cgi-bin/carddisp.pl?gene=CEL
VIP	Vasoactive Intestinal Peptide	Protein Coding	P01282	57	GC06P152750	24.5392	https://www.genecards.org/cgi-bin/carddisp.pl?gene=VIP
EIF4G1	Eukaryotic Translation Initiation Factor 4 Gamma 1	Protein Coding	Q04637	60	GC03P184314	24.5217	https://www.genecards.org/cgi-bin/carddisp.pl?gene=EIF4G1
PDE4D	Phosphodiesterase 4D	Protein Coding	Q08499	62	GC05M058969	24.5209	https://www.genecards.org/cgi-bin/carddisp.pl?gene=PDE4D
SLC2A4	Solute Carrier Family 2 Member 4	Protein Coding	P14672	60	GC17P121899	24.5148	https://www.genecards.org/cgi-bin/carddisp.pl?gene=SLC2A4
IGFBP1	Insulin Like Growth Factor Binding Protein 1	Protein Coding	P08833	56	GC07P049854	24.4888	https://www.genecards.org/cgi-bin/carddisp.pl?gene=IGFBP1
PGR-AS1	PGR Antisense RNA 1	RNA Gene		20	GC11P101131	24.4742	https://www.genecards.org/cgi-bin/carddisp.pl?gene=PGR-AS1
PRKCA	Protein Kinase C Alpha	Protein Coding	P17252	64	GC17P066302	24.4401	https://www.genecards.org/cgi-bin/carddisp.pl?gene=PRKCA
VTN	Vitronectin	Protein Coding	P04004	57	GC17M084696	24.3751	https://www.genecards.org/cgi-bin/carddisp.pl?gene=VTN
CHEK1	Checkpoint Kinase 1	Protein Coding	O14757	65	GC11P125625	24.3297	https://www.genecards.org/cgi-bin/carddisp.pl?gene=CHEK1
HGF	Hepatocyte Growth Factor	Protein Coding	P14210	65	GC07M081699	24.3284	https://www.genecards.org/cgi-bin/carddisp.pl?gene=HGF
TIMP1	TIMP Metallopeptidase Inhibitor 1	Protein Coding	P01033	58	GC0XP058331	24.2935	https://www.genecards.org/cgi-bin/carddisp.pl?gene=TIMP1
TYROBP	Transmembrane Immune Signaling Adaptor TYROBP	Protein Coding	O43914	56	GC19M035904	24.2874	https://www.genecards.org/cgi-bin/carddisp.pl?gene=TYROBP
CACNB4	Calcium Voltage-Gated Channel Auxiliary Subunit Beta 4	Protein Coding	O00305	58	GC02M151832	24.2739	https://www.genecards.org/cgi-bin/carddisp.pl?gene=CACNB4
MIR222	MicroRNA 222	RNA Gene		29	GC0XM045747	24.2509	https://www.genecards.org/cgi-bin/carddisp.pl?gene=MIR222
CLU	Clusterin	Protein Coding	P10909	60	GC08M027596	24.2509	https://www.genecards.org/cgi-bin/carddisp.pl?gene=CLU
PIK3CB	Phosphatidylinositol-4,5-Bisphosphate 3-Kinase Catalytic Subunit Beta	Protein Coding	P42338	62	GC03M138652	24.2502	https://www.genecards.org/cgi-bin/carddisp.pl?gene=PIK3CB
MIR200C	MicroRNA 200c	RNA Gene		31	GC12P042128	24.2323	https://www.genecards.org/cgi-bin/carddisp.pl?gene=MIR200C
ACVR1	Activin A Receptor Type 1	Protein Coding	Q04771	64	GC02M157736	24.2193	https://www.genecards.org/cgi-bin/carddisp.pl?gene=ACVR1
SLC20A2	Solute Carrier Family 20 Member 2	Protein Coding	Q08357	59	GC08M042416	24.2028	https://www.genecards.org/cgi-bin/carddisp.pl?gene=SLC20A2
SELP	Selectin P	Protein Coding	P16109	59	GC01M169558	24.1649	https://www.genecards.org/cgi-bin/carddisp.pl?gene=SELP
ARG2	Arginase 2	Protein Coding	P78540	59	GC14P067619	24.1246	https://www.genecards.org/cgi-bin/carddisp.pl?gene=ARG2
SIRT3	Sirtuin 3	Protein Coding	Q9NTG7	60	GC11M000215	24.0573	https://www.genecards.org/cgi-bin/carddisp.pl?gene=SIRT3
SELE	Selectin E	Protein Coding	P16581	57	GC01M169722	24.0548	https://www.genecards.org/cgi-bin/carddisp.pl?gene=SELE
RPS27A	Ribosomal Protein S27a	Protein Coding	P62979	55	GC02P055231	24.0489	https://www.genecards.org/cgi-bin/carddisp.pl?gene=RPS27A
POU5F1	POU Class 5 Homeobox 1	Protein Coding	Q01860	60	GC06M097053	24.0434	https://www.genecards.org/cgi-bin/carddisp.pl?gene=POU5F1
PKM	Pyruvate Kinase M1/2	Protein Coding	P14618	63	GC15M072199	24.0024	https://www.genecards.org/cgi-bin/carddisp.pl?gene=PKM
LHCGR	Luteinizing Hormone/Choriogonadotropin Receptor	Protein Coding	P22888	59	GC02M048686	23.9829	https://www.genecards.org/cgi-bin/carddisp.pl?gene=LHCGR
HMGB1	High Mobility Group Box 1	Protein Coding	P09429	62	GC13M030456	23.9556	https://www.genecards.org/cgi-bin/carddisp.pl?gene=HMGB1
GUCY2D	Guanylate Cyclase 2D, Retinal	Protein Coding	Q02846	58	GC17P008002	23.954	https://www.genecards.org/cgi-bin/carddisp.pl?gene=GUCY2D
NEFL	Neurofilament Light Chain	Protein Coding	P07196	58	GC08M024950	23.9446	https://www.genecards.org/cgi-bin/carddisp.pl?gene=NEFL
ATP2A2	ATPase Sarcoplasmic/Endoplasmic Reticulum Ca2+ Transporting 2	Protein Coding	P16615	64	GC12P110280	23.8919	https://www.genecards.org/cgi-bin/carddisp.pl?gene=ATP2A2
PPIG	Peptidylprolyl Isomerase G	Protein Coding	Q13427	52	GC02P169584	23.8773	https://www.genecards.org/cgi-bin/carddisp.pl?gene=PPIG
HDAC8	Histone Deacetylase 8	Protein Coding	Q9BY41	61	GC0XM072329	23.8408	https://www.genecards.org/cgi-bin/carddisp.pl?gene=HDAC8
KEAP1	Kelch Like ECH Associated Protein 1	Protein Coding	Q14145	61	GC19M010486	23.7885	https://www.genecards.org/cgi-bin/carddisp.pl?gene=KEAP1
FTH1	Ferritin Heavy Chain 1	Protein Coding	P02794	63	GC11M061959	23.7645	https://www.genecards.org/cgi-bin/carddisp.pl?gene=FTH1
HTR2C	5-Hydroxytryptamine Receptor 2C	Protein Coding	P28335	58	GC0XP114584	23.7439	https://www.genecards.org/cgi-bin/carddisp.pl?gene=HTR2C
VCAM1	Vascular Cell Adhesion Molecule 1	Protein Coding	P19320	59	GC01P100719	23.7078	https://www.genecards.org/cgi-bin/carddisp.pl?gene=VCAM1
SLC6A1	Solute Carrier Family 6 Member 1	Protein Coding	P30531	59	GC03P022813	23.665	https://www.genecards.org/cgi-bin/carddisp.pl?gene=SLC6A1
ADPRM	ADP-Ribose/CDP-Alcohol Diphosphatase, Manganese Dependent	Protein Coding	Q3LIE5	35	GC17P010697	23.6602	https://www.genecards.org/cgi-bin/carddisp.pl?gene=ADPRM
TUBA4A	Tubulin Alpha 4a	Protein Coding	P68366	60	GC02M219249	23.6571	https://www.genecards.org/cgi-bin/carddisp.pl?gene=TUBA4A
TBP	TATA-Box Binding Protein	Protein Coding	P20226	62	GC06P170554	23.6447	https://www.genecards.org/cgi-bin/carddisp.pl?gene=TBP
PRKACG	Protein Kinase CAMP-Activated Catalytic Subunit Gamma	Protein Coding	P22612	58	GC09M071137	23.632	https://www.genecards.org/cgi-bin/carddisp.pl?gene=PRKACG
D2HGDH	D-2-Hydroxyglutarate Dehydrogenase	Protein Coding	Q8N465	56	GC02P241734	23.6146	https://www.genecards.org/cgi-bin/carddisp.pl?gene=D2HGDH
GAL	Galanin And GMAP Prepropeptide	Protein Coding	P22466	58	GC11P094859	23.5981	https://www.genecards.org/cgi-bin/carddisp.pl?gene=GAL
MYOD1	Myogenic Differentiation 1	Protein Coding	P15172	59	GC11P017719	23.5924	https://www.genecards.org/cgi-bin/carddisp.pl?gene=MYOD1
KCNH1	Potassium Voltage-Gated Channel Subfamily H Member 1	Protein Coding	O95259	59	GC01M210678	23.5562	https://www.genecards.org/cgi-bin/carddisp.pl?gene=KCNH1
LCK	LCK Proto-Oncogene, Src Family Tyrosine Kinase	Protein Coding	P06239	64	GC01P032251	23.5485	https://www.genecards.org/cgi-bin/carddisp.pl?gene=LCK
NRG1	Neuregulin 1	Protein Coding	Q02297	62	GC08P031639	23.5468	https://www.genecards.org/cgi-bin/carddisp.pl?gene=NRG1
UGT1A	UDP Glucuronosyltransferase Family 1 Member A Complex Locus	Uncategorized		20	GC02P233683	23.5459	https://www.genecards.org/cgi-bin/carddisp.pl?gene=UGT1A
IDO1	Indoleamine 2,3-Dioxygenase 1	Protein Coding	P14902	59	GC08P040556	23.5382	https://www.genecards.org/cgi-bin/carddisp.pl?gene=IDO1
PPM1D	Protein Phosphatase, Mg2+/Mn2+ Dependent 1D	Protein Coding	O15297	60	GC17P060600	23.538	https://www.genecards.org/cgi-bin/carddisp.pl?gene=PPM1D
VCAN	Versican	Protein Coding	P13611	60	GC05P083471	23.5328	https://www.genecards.org/cgi-bin/carddisp.pl?gene=VCAN
DDIT3	DNA Damage Inducible Transcript 3	Protein Coding	P35638	60	GC12M057516	23.532	https://www.genecards.org/cgi-bin/carddisp.pl?gene=DDIT3
PRKCD	Protein Kinase C Delta	Protein Coding	Q05655	66	GC03P053156	23.5056	https://www.genecards.org/cgi-bin/carddisp.pl?gene=PRKCD
PIK3C2A	Phosphatidylinositol-4-Phosphate 3-Kinase Catalytic Subunit Type 2 Alpha	Protein Coding	O00443	60	GC11M017980	23.4976	https://www.genecards.org/cgi-bin/carddisp.pl?gene=PIK3C2A
GP1BA	Glycoprotein Ib Platelet Subunit Alpha	Protein Coding	P07359	60	GC17P004932	23.4827	https://www.genecards.org/cgi-bin/carddisp.pl?gene=GP1BA
CALCR	Calcitonin Receptor	Protein Coding	P30988	60	GC07M093424	23.4683	https://www.genecards.org/cgi-bin/carddisp.pl?gene=CALCR
DMRT1	Doublesex And Mab-3 Related Transcription Factor 1	Protein Coding	Q9Y5R6	51	GC09P000831	23.4573	https://www.genecards.org/cgi-bin/carddisp.pl?gene=DMRT1
MAP1B	Microtubule Associated Protein 1B	Protein Coding	P46821	58	GC05P072107	23.4173	https://www.genecards.org/cgi-bin/carddisp.pl?gene=MAP1B
GDF15	Growth Differentiation Factor 15	Protein Coding	Q99988	56	GC19P122626	23.4051	https://www.genecards.org/cgi-bin/carddisp.pl?gene=GDF15
CTNNA1	Catenin Alpha 1	Protein Coding	P35221	59	GC05P138710	23.3306	https://www.genecards.org/cgi-bin/carddisp.pl?gene=CTNNA1
OGG1	8-Oxoguanine DNA Glycosylase	Protein Coding	O15527	60	GC03P022757	23.3089	https://www.genecards.org/cgi-bin/carddisp.pl?gene=OGG1
TSPO	Translocator Protein	Protein Coding	B1AH88	58	GC22P043151	23.3025	https://www.genecards.org/cgi-bin/carddisp.pl?gene=TSPO
PTK2B	Protein Tyrosine Kinase 2 Beta	Protein Coding	Q14289	63	GC08P027311	23.2946	https://www.genecards.org/cgi-bin/carddisp.pl?gene=PTK2B
CHMP2B	Charged Multivesicular Body Protein 2B	Protein Coding	Q9UQN3	56	GC03P087227	23.274	https://www.genecards.org/cgi-bin/carddisp.pl?gene=CHMP2B
TRPM6	Transient Receptor Potential Cation Channel Subfamily M Member 6	Protein Coding	Q9BX84	56	GC09M074725	23.2708	https://www.genecards.org/cgi-bin/carddisp.pl?gene=TRPM6
MIR200B	MicroRNA 200b	RNA Gene		30	GC01P001167	23.2098	https://www.genecards.org/cgi-bin/carddisp.pl?gene=MIR200B
TACR3	Tachykinin Receptor 3	Protein Coding	P29371	62	GC04M103586	23.1656	https://www.genecards.org/cgi-bin/carddisp.pl?gene=TACR3
CSNK2B	Casein Kinase 2 Beta	Protein Coding	P67870	61	GC06P144767	23.1641	https://www.genecards.org/cgi-bin/carddisp.pl?gene=CSNK2B
GABRD	Gamma-Aminobutyric Acid Type A Receptor Subunit Delta	Protein Coding	O14764	58	GC01P002019	23.1355	https://www.genecards.org/cgi-bin/carddisp.pl?gene=GABRD
ITGB1	Integrin Subunit Beta 1	Protein Coding	P05556	63	GC10M036096	23.1291	https://www.genecards.org/cgi-bin/carddisp.pl?gene=ITGB1
RPA1	Replication Protein A1	Protein Coding	P27694	59	GC17P001829	23.1163	https://www.genecards.org/cgi-bin/carddisp.pl?gene=RPA1
MIPEP	Mitochondrial Intermediate Peptidase	Protein Coding	Q99797	54	GC13M023730	23.026	https://www.genecards.org/cgi-bin/carddisp.pl?gene=MIPEP
ELAC2	ElaC Ribonuclease Z 2	Protein Coding	Q9BQ52	54	GC17M012991	23.0254	https://www.genecards.org/cgi-bin/carddisp.pl?gene=ELAC2
MED23	Mediator Complex Subunit 23	Protein Coding	Q9ULK4	55	GC06M131573	23.0169	https://www.genecards.org/cgi-bin/carddisp.pl?gene=MED23
TOP2A	DNA Topoisomerase II Alpha	Protein Coding	P11388	64	GC17M040388	22.9656	https://www.genecards.org/cgi-bin/carddisp.pl?gene=TOP2A
MIR335	MicroRNA 335	RNA Gene		29	GC07P130496	22.9547	https://www.genecards.org/cgi-bin/carddisp.pl?gene=MIR335
GPX4	Glutathione Peroxidase 4	Protein Coding	P36969	60	GC19P001103	22.9162	https://www.genecards.org/cgi-bin/carddisp.pl?gene=GPX4
HCN4	Hyperpolarization Activated Cyclic Nucleotide Gated Potassium Channel 4	Protein Coding	Q9Y3Q4	60	GC15M073319	22.9123	https://www.genecards.org/cgi-bin/carddisp.pl?gene=HCN4
XRCC3	X-Ray Repair Cross Complementing 3	Protein Coding	O43542	55	GC14M103697	22.8769	https://www.genecards.org/cgi-bin/carddisp.pl?gene=XRCC3
FBXO7	F-Box Protein 7	Protein Coding	Q9Y3I1	56	GC22P032474	22.872	https://www.genecards.org/cgi-bin/carddisp.pl?gene=FBXO7
AFP	Alpha Fetoprotein	Protein Coding	P02771	60	GC04P073431	22.8577	https://www.genecards.org/cgi-bin/carddisp.pl?gene=AFP
ACHE	Acetylcholinesterase (Yt Blood Group)	Protein Coding	P22303	60	GC07M100889	22.8513	https://www.genecards.org/cgi-bin/carddisp.pl?gene=ACHE
CACNA1E	Calcium Voltage-Gated Channel Subunit Alpha1 E	Protein Coding	Q15878	59	GC01P181317	22.8097	https://www.genecards.org/cgi-bin/carddisp.pl?gene=CACNA1E
CXCL12	C-X-C Motif Chemokine Ligand 12	Protein Coding	P48061	59	GC10M044370	22.7989	https://www.genecards.org/cgi-bin/carddisp.pl?gene=CXCL12
PTGS1	Prostaglandin-Endoperoxide Synthase 1	Protein Coding	P23219	60	GC09P122370	22.7824	https://www.genecards.org/cgi-bin/carddisp.pl?gene=PTGS1
APEX1	Apurinic/Apyrimidinic Endodeoxyribonuclease 1	Protein Coding	P27695	58	GC14P020455	22.678	https://www.genecards.org/cgi-bin/carddisp.pl?gene=APEX1
CERS1	Ceramide Synthase 1	Protein Coding	P27544	55	GC19M018868	22.6673	https://www.genecards.org/cgi-bin/carddisp.pl?gene=CERS1
CAPN10	Calpain 10	Protein Coding	Q9HC96	53	GC02P240586	22.5605	https://www.genecards.org/cgi-bin/carddisp.pl?gene=CAPN10
LPA	Lipoprotein(A)	Protein Coding	P08519	54	GC06M160531	22.5589	https://www.genecards.org/cgi-bin/carddisp.pl?gene=LPA
MIR195	MicroRNA 195	RNA Gene		28	GC17M084118	22.536	https://www.genecards.org/cgi-bin/carddisp.pl?gene=MIR195
CCN2	Cellular Communication Network Factor 2	Protein Coding	P29279	59	GC06M131948	22.512	https://www.genecards.org/cgi-bin/carddisp.pl?gene=CCN2
PPP2CA	Protein Phosphatase 2 Catalytic Subunit Alpha	Protein Coding	P67775	64	GC05M134194	22.4799	https://www.genecards.org/cgi-bin/carddisp.pl?gene=PPP2CA
A2M	Alpha-2-Macroglobulin	Protein Coding	P01023	59	GC12M009067	22.4474	https://www.genecards.org/cgi-bin/carddisp.pl?gene=A2M
IL1R1	Interleukin 1 Receptor Type 1	Protein Coding	P14778	60	GC02P102136	22.437	https://www.genecards.org/cgi-bin/carddisp.pl?gene=IL1R1
VPS35	VPS35 Retromer Complex Component	Protein Coding	Q96QK1	55	GC16M047331	22.4242	https://www.genecards.org/cgi-bin/carddisp.pl?gene=VPS35
LOC106627981	GBA Recombination Region	Functional Element		11	GC01P155233	22.4236	https://www.genecards.org/cgi-bin/carddisp.pl?gene=LOC106627981
LCN2	Lipocalin 2	Protein Coding	P80188	58	GC09P128149	22.4163	https://www.genecards.org/cgi-bin/carddisp.pl?gene=LCN2
MIR200A	MicroRNA 200a	RNA Gene		29	GC01P050633	22.3998	https://www.genecards.org/cgi-bin/carddisp.pl?gene=MIR200A
ITGA2	Integrin Subunit Alpha 2	Protein Coding	P17301	59	GC05P052989	22.3975	https://www.genecards.org/cgi-bin/carddisp.pl?gene=ITGA2
GCLM	Glutamate-Cysteine Ligase Modifier Subunit	Protein Coding	P48507	54	GC01M093885	22.3936	https://www.genecards.org/cgi-bin/carddisp.pl?gene=GCLM
NEDD4L	NEDD4 Like E3 Ubiquitin Protein Ligase	Protein Coding	Q96PU5	58	GC18P058044	22.3475	https://www.genecards.org/cgi-bin/carddisp.pl?gene=NEDD4L
XYLT2	Xylosyltransferase 2	Protein Coding	Q9H1B5	58	GC17P123355	22.3305	https://www.genecards.org/cgi-bin/carddisp.pl?gene=XYLT2
DNASE1	Deoxyribonuclease 1	Protein Coding	P24855	56	GC16P003611	22.317	https://www.genecards.org/cgi-bin/carddisp.pl?gene=DNASE1
MIR151A	MicroRNA 151a	RNA Gene		28	GC08M140954	22.3059	https://www.genecards.org/cgi-bin/carddisp.pl?gene=MIR151A
ACACB	Acetyl-CoA Carboxylase Beta	Protein Coding	O00763	59	GC12P109116	22.2973	https://www.genecards.org/cgi-bin/carddisp.pl?gene=ACACB
CD14	CD14 Molecule	Protein Coding	P08571	59	GC05M140631	22.2501	https://www.genecards.org/cgi-bin/carddisp.pl?gene=CD14
SLC35A3	Solute Carrier Family 35 Member A3	Protein Coding	Q9Y2D2	53	GC01P100052	22.2336	https://www.genecards.org/cgi-bin/carddisp.pl?gene=SLC35A3
XBP1	X-Box Binding Protein 1	Protein Coding	P17861	59	GC22M028794	22.2315	https://www.genecards.org/cgi-bin/carddisp.pl?gene=XBP1
MGAT2	Alpha-1,6-Mannosyl-Glycoprotein 2-Beta-N-Acetylglucosaminyltransferase	Protein Coding	Q10469	57	GC14P049620	22.2034	https://www.genecards.org/cgi-bin/carddisp.pl?gene=MGAT2
MIR133B	MicroRNA 133b	RNA Gene		31	GC06P052148	22.1865	https://www.genecards.org/cgi-bin/carddisp.pl?gene=MIR133B
HSPA5	Heat Shock Protein Family A (Hsp70) Member 5	Protein Coding	P11021	62	GC09M125234	22.1663	https://www.genecards.org/cgi-bin/carddisp.pl?gene=HSPA5
TRPM7	Transient Receptor Potential Cation Channel Subfamily M Member 7	Protein Coding	Q96QT4	56	GC15M050552	22.1357	https://www.genecards.org/cgi-bin/carddisp.pl?gene=TRPM7
SMG1	SMG1 Nonsense Mediated MRNA Decay Associated PI3K Related Kinase	Protein Coding	Q96Q15	50	GC16M026246	22.1296	https://www.genecards.org/cgi-bin/carddisp.pl?gene=SMG1
CSTB	Cystatin B	Protein Coding	P04080	59	GC21M043772	22.12	https://www.genecards.org/cgi-bin/carddisp.pl?gene=CSTB
TLR3	Toll Like Receptor 3	Protein Coding	O15455	64	GC04P186059	22.0824	https://www.genecards.org/cgi-bin/carddisp.pl?gene=TLR3
CDH2	Cadherin 2	Protein Coding	P19022	64	GC18M035096	22.0793	https://www.genecards.org/cgi-bin/carddisp.pl?gene=CDH2
PTK2	Protein Tyrosine Kinase 2	Protein Coding	Q05397	61	GC08M140657	22.0738	https://www.genecards.org/cgi-bin/carddisp.pl?gene=PTK2
APOC1	Apolipoprotein C1	Protein Coding	P02654	53	GC19P044914	22.0654	https://www.genecards.org/cgi-bin/carddisp.pl?gene=APOC1
ATN1	Atrophin 1	Protein Coding	P54259	56	GC12P042125	22.0617	https://www.genecards.org/cgi-bin/carddisp.pl?gene=ATN1
IL3	Interleukin 3	Protein Coding	P08700	58	GC05P132060	22.0348	https://www.genecards.org/cgi-bin/carddisp.pl?gene=IL3
XPNPEP3	X-Prolyl Aminopeptidase 3	Protein Coding	Q9NQH7	54	GC22P040857	21.9699	https://www.genecards.org/cgi-bin/carddisp.pl?gene=XPNPEP3
RAB3GAP1	RAB3 GTPase Activating Protein Catalytic Subunit 1	Protein Coding	Q15042	53	GC02P135052	21.9696	https://www.genecards.org/cgi-bin/carddisp.pl?gene=RAB3GAP1
PFN1	Profilin 1	Protein Coding	P07737	59	GC17M004945	21.9403	https://www.genecards.org/cgi-bin/carddisp.pl?gene=PFN1
HSPA1A	Heat Shock Protein Family A (Hsp70) Member 1A	Protein Coding	P0DMV8	59	GC06P144781	21.9107	https://www.genecards.org/cgi-bin/carddisp.pl?gene=HSPA1A
SLC39A4	Solute Carrier Family 39 Member 4	Protein Coding	Q6P5W5	55	GC08M144409	21.8978	https://www.genecards.org/cgi-bin/carddisp.pl?gene=SLC39A4
RPS19	Ribosomal Protein S19	Protein Coding	P39019	61	GC19P123133	21.8232	https://www.genecards.org/cgi-bin/carddisp.pl?gene=RPS19
B3GLCT	Beta 3-Glucosyltransferase	Protein Coding	Q6Y288	51	GC13P031215	21.7752	https://www.genecards.org/cgi-bin/carddisp.pl?gene=B3GLCT
TXN	Thioredoxin	Protein Coding	P10599	59	GC09M110243	21.7305	https://www.genecards.org/cgi-bin/carddisp.pl?gene=TXN
ATF6	Activating Transcription Factor 6	Protein Coding	P18850	61	GC01P161766	21.7163	https://www.genecards.org/cgi-bin/carddisp.pl?gene=ATF6
THAP1	THAP Domain Containing 1	Protein Coding	Q9NVV9	51	GC08M042836	21.6772	https://www.genecards.org/cgi-bin/carddisp.pl?gene=THAP1
MB	Myoglobin	Protein Coding	P02144	58	GC22M035606	21.6472	https://www.genecards.org/cgi-bin/carddisp.pl?gene=MB
LYN	LYN Proto-Oncogene, Src Family Tyrosine Kinase	Protein Coding	P07948	63	GC08P055879	21.6267	https://www.genecards.org/cgi-bin/carddisp.pl?gene=LYN
TNFAIP3	TNF Alpha Induced Protein 3	Protein Coding	P21580	62	GC06P137866	21.5994	https://www.genecards.org/cgi-bin/carddisp.pl?gene=TNFAIP3
CXCL10	C-X-C Motif Chemokine Ligand 10	Protein Coding	P02778	57	GC04M076021	21.5565	https://www.genecards.org/cgi-bin/carddisp.pl?gene=CXCL10
ACP5	Acid Phosphatase 5, Tartrate Resistant	Protein Coding	P13686	59	GC19M011574	21.5373	https://www.genecards.org/cgi-bin/carddisp.pl?gene=ACP5
ATXN3	Ataxin 3	Protein Coding	P54252	59	GC14M120874	21.5338	https://www.genecards.org/cgi-bin/carddisp.pl?gene=ATXN3
NUDT15	Nudix Hydrolase 15	Protein Coding	Q9NV35	48	GC13P048037	21.5314	https://www.genecards.org/cgi-bin/carddisp.pl?gene=NUDT15
CCNA2	Cyclin A2	Protein Coding	P20248	59	GC04M121816	21.5081	https://www.genecards.org/cgi-bin/carddisp.pl?gene=CCNA2
SOD3	Superoxide Dismutase 3	Protein Coding	P08294	56	GC04P025931	21.485	https://www.genecards.org/cgi-bin/carddisp.pl?gene=SOD3
AGO2	Argonaute RISC Catalytic Component 2	Protein Coding	Q9UKV8	56	GC08M140949	21.4634	https://www.genecards.org/cgi-bin/carddisp.pl?gene=AGO2
MIR23A	MicroRNA 23a	RNA Gene		30	GC19M096312	21.4531	https://www.genecards.org/cgi-bin/carddisp.pl?gene=MIR23A
MIR214	MicroRNA 214	RNA Gene		31	GC01M172234	21.4395	https://www.genecards.org/cgi-bin/carddisp.pl?gene=MIR214
SLC1A4	Solute Carrier Family 1 Member 4	Protein Coding	P43007	57	GC02P064988	21.404	https://www.genecards.org/cgi-bin/carddisp.pl?gene=SLC1A4
RIPK1	Receptor Interacting Serine/Threonine Kinase 1	Protein Coding	Q13546	63	GC06P007000	21.3985	https://www.genecards.org/cgi-bin/carddisp.pl?gene=RIPK1
MIR148A	MicroRNA 148a	RNA Gene		29	GC07M025950	21.3855	https://www.genecards.org/cgi-bin/carddisp.pl?gene=MIR148A
NR2E3	Nuclear Receptor Subfamily 2 Group E Member 3	Protein Coding	Q9Y5X4	55	GC15P071792	21.3787	https://www.genecards.org/cgi-bin/carddisp.pl?gene=NR2E3
STING1	Stimulator Of Interferon Response CGAMP Interactor 1	Protein Coding	Q86WV6	54	GC05M139495	21.3177	https://www.genecards.org/cgi-bin/carddisp.pl?gene=STING1
TXN2	Thioredoxin 2	Protein Coding	Q99757	55	GC22M036467	21.3042	https://www.genecards.org/cgi-bin/carddisp.pl?gene=TXN2
RELB	RELB Proto-Oncogene, NF-KB Subunit	Protein Coding	Q01201	59	GC19P123248	21.2302	https://www.genecards.org/cgi-bin/carddisp.pl?gene=RELB
AKR1C3	Aldo-Keto Reductase Family 1 Member C3	Protein Coding	P42330	58	GC10P005035	21.2202	https://www.genecards.org/cgi-bin/carddisp.pl?gene=AKR1C3
IFNB1	Interferon Beta 1	Protein Coding	P01574	56	GC09M021077	21.2002	https://www.genecards.org/cgi-bin/carddisp.pl?gene=IFNB1
NUS1	NUS1 Dehydrodolichyl Diphosphate Synthase Subunit	Protein Coding	Q96E22	51	GC06P117675	21.1464	https://www.genecards.org/cgi-bin/carddisp.pl?gene=NUS1
LDHB	Lactate Dehydrogenase B	Protein Coding	P07195	58	GC12M021635	21.1431	https://www.genecards.org/cgi-bin/carddisp.pl?gene=LDHB
KYNU	Kynureninase	Protein Coding	Q16719	61	GC02P142877	21.1271	https://www.genecards.org/cgi-bin/carddisp.pl?gene=KYNU
SLC5A7	Solute Carrier Family 5 Member 7	Protein Coding	Q9GZV3	56	GC02P107969	21.1259	https://www.genecards.org/cgi-bin/carddisp.pl?gene=SLC5A7
FOXE3	Forkhead Box E3	Protein Coding	Q13461	48	GC01P047416	21.0504	https://www.genecards.org/cgi-bin/carddisp.pl?gene=FOXE3
TNFRSF1B	TNF Receptor Superfamily Member 1B	Protein Coding	P20333	61	GC01P051309	21.0104	https://www.genecards.org/cgi-bin/carddisp.pl?gene=TNFRSF1B
MAG	Myelin Associated Glycoprotein	Protein Coding	P20916	60	GC19P035292	21.0101	https://www.genecards.org/cgi-bin/carddisp.pl?gene=MAG
ACO1	Aconitase 1	Protein Coding	P21399	56	GC09P032374	20.994	https://www.genecards.org/cgi-bin/carddisp.pl?gene=ACO1
IDH3B	Isocitrate Dehydrogenase (NAD(+)) 3 Non-Catalytic Subunit Beta	Protein Coding	O43837	55	GC20M002658	20.9686	https://www.genecards.org/cgi-bin/carddisp.pl?gene=IDH3B
PRKAB1	Protein Kinase AMP-Activated Non-Catalytic Subunit Beta 1	Protein Coding	Q9Y478	60	GC12P119667	20.961	https://www.genecards.org/cgi-bin/carddisp.pl?gene=PRKAB1
C12orf57	Chromosome 12 Open Reading Frame 57	Protein Coding	Q99622	48	GC12P042127	20.96	https://www.genecards.org/cgi-bin/carddisp.pl?gene=C12orf57
SUMO1	Small Ubiquitin Like Modifier 1	Protein Coding	P63165	59	GC02M202206	20.9527	https://www.genecards.org/cgi-bin/carddisp.pl?gene=SUMO1
CEBPB	CCAAT Enhancer Binding Protein Beta	Protein Coding	P17676	58	GC20P050190	20.9525	https://www.genecards.org/cgi-bin/carddisp.pl?gene=CEBPB
CHRNA7	Cholinergic Receptor Nicotinic Alpha 7 Subunit	Protein Coding	P36544	56	GC15P031923	20.9357	https://www.genecards.org/cgi-bin/carddisp.pl?gene=CHRNA7
CSRP3	Cysteine And Glycine Rich Protein 3	Protein Coding	P50461	55	GC11M019160	20.9295	https://www.genecards.org/cgi-bin/carddisp.pl?gene=CSRP3
S100A8	S100 Calcium Binding Protein A8	Protein Coding	P05109	55	GC01M163874	20.9181	https://www.genecards.org/cgi-bin/carddisp.pl?gene=S100A8
PLPBP	Pyridoxal Phosphate Binding Protein	Protein Coding	O94903	51	GC08P040401	20.8923	https://www.genecards.org/cgi-bin/carddisp.pl?gene=PLPBP
ATG14	Autophagy Related 14	Protein Coding	Q6ZNE5	49	GC14M055366	20.8733	https://www.genecards.org/cgi-bin/carddisp.pl?gene=ATG14
SERPINA3	Serpin Family A Member 3	Protein Coding	P01011	56	GC14P094612	20.8627	https://www.genecards.org/cgi-bin/carddisp.pl?gene=SERPINA3
IREB2	Iron Responsive Element Binding Protein 2	Protein Coding	P48200	58	GC15P078437	20.8596	https://www.genecards.org/cgi-bin/carddisp.pl?gene=IREB2
FOXM1	Forkhead Box M1	Protein Coding	Q08050	56	GC12M002857	20.8228	https://www.genecards.org/cgi-bin/carddisp.pl?gene=FOXM1
DNAJC6	DnaJ Heat Shock Protein Family (Hsp40) Member C6	Protein Coding	O75061	56	GC01P065248	20.7986	https://www.genecards.org/cgi-bin/carddisp.pl?gene=DNAJC6
NAT1	N-Acetyltransferase 1	Protein Coding	P18440	58	GC08P018183	20.7729	https://www.genecards.org/cgi-bin/carddisp.pl?gene=NAT1
LTF	Lactotransferrin	Protein Coding	P02788	58	GC03M046435	20.7411	https://www.genecards.org/cgi-bin/carddisp.pl?gene=LTF
AKR1A1	Aldo-Keto Reductase Family 1 Member A1	Protein Coding	P14550	56	GC01P045550	20.7371	https://www.genecards.org/cgi-bin/carddisp.pl?gene=AKR1A1
DROSHA	Drosha Ribonuclease III	Protein Coding	Q9NRR4	57	GC05M031401	20.7316	https://www.genecards.org/cgi-bin/carddisp.pl?gene=DROSHA
IL7	Interleukin 7	Protein Coding	P13232	55	GC08M078689	20.7268	https://www.genecards.org/cgi-bin/carddisp.pl?gene=IL7
MBP	Myelin Basic Protein	Protein Coding	P02686	58	GC18M076978	20.7191	https://www.genecards.org/cgi-bin/carddisp.pl?gene=MBP
SMOC1	SPARC Related Modular Calcium Binding 1	Protein Coding	Q9H4F8	52	GC14P069854	20.7153	https://www.genecards.org/cgi-bin/carddisp.pl?gene=SMOC1
CACNA1B	Calcium Voltage-Gated Channel Subunit Alpha1 B	Protein Coding	Q00975	62	GC09P137877	20.6767	https://www.genecards.org/cgi-bin/carddisp.pl?gene=CACNA1B
MIR424	MicroRNA 424	RNA Gene		28	GC0XM134881	20.6417	https://www.genecards.org/cgi-bin/carddisp.pl?gene=MIR424
TAP2	Transporter 2, ATP Binding Cassette Subfamily B Member	Protein Coding	Q03519	57	GC06M032821	20.638	https://www.genecards.org/cgi-bin/carddisp.pl?gene=TAP2
POLA1	DNA Polymerase Alpha 1, Catalytic Subunit	Protein Coding	P09884	59	GC0XP024693	20.6347	https://www.genecards.org/cgi-bin/carddisp.pl?gene=POLA1
CANT1	Calcium Activated Nucleotidase 1	Protein Coding	Q8WVQ1	58	GC17M086348	20.6275	https://www.genecards.org/cgi-bin/carddisp.pl?gene=CANT1
PXDN	Peroxidasin	Protein Coding	Q92626	57	GC02M001635	20.6255	https://www.genecards.org/cgi-bin/carddisp.pl?gene=PXDN
CSF1	Colony Stimulating Factor 1	Protein Coding	P09603	58	GC01P109911	20.618	https://www.genecards.org/cgi-bin/carddisp.pl?gene=CSF1
GAD2	Glutamate Decarboxylase 2	Protein Coding	Q05329	56	GC10P026216	20.6066	https://www.genecards.org/cgi-bin/carddisp.pl?gene=GAD2
COMP	Cartilage Oligomeric Matrix Protein	Protein Coding	P49747	59	GC19M096524	20.598	https://www.genecards.org/cgi-bin/carddisp.pl?gene=COMP
MIR106B	MicroRNA 106b	RNA Gene		31	GC07M105744	20.5979	https://www.genecards.org/cgi-bin/carddisp.pl?gene=MIR106B
GRIA3	Glutamate Ionotropic Receptor AMPA Type Subunit 3	Protein Coding	P42263	63	GC0XP123184	20.5623	https://www.genecards.org/cgi-bin/carddisp.pl?gene=GRIA3
OAS1	2'-5'-Oligoadenylate Synthetase 1	Protein Coding	P00973	56	GC12P113084	20.5575	https://www.genecards.org/cgi-bin/carddisp.pl?gene=OAS1
TRE-TTC3-1	TRNA-Glu (Anticodon TTC) 3-1	RNA Gene		18	GC01P051673	20.5301	https://www.genecards.org/cgi-bin/carddisp.pl?gene=TRE-TTC3-1
RNASEL	Ribonuclease L	Protein Coding	Q05823	57	GC01M182573	20.5258	https://www.genecards.org/cgi-bin/carddisp.pl?gene=RNASEL
DDB2	Damage Specific DNA Binding Protein 2	Protein Coding	Q92466	59	GC11P048082	20.5094	https://www.genecards.org/cgi-bin/carddisp.pl?gene=DDB2
AKR1B1	Aldo-Keto Reductase Family 1 Member B	Protein Coding	P15121	59	GC07M134442	20.4969	https://www.genecards.org/cgi-bin/carddisp.pl?gene=AKR1B1
RAP1A	RAP1A, Member Of RAS Oncogene Family	Protein Coding	P62834	57	GC01P111542	20.4626	https://www.genecards.org/cgi-bin/carddisp.pl?gene=RAP1A
NRF1	Nuclear Respiratory Factor 1	Protein Coding	Q16656	56	GC07P129611	20.452	https://www.genecards.org/cgi-bin/carddisp.pl?gene=NRF1
SCD	Stearoyl-CoA Desaturase	Protein Coding	O00767	63	GC10P100347	20.3751	https://www.genecards.org/cgi-bin/carddisp.pl?gene=SCD
TGFA	Transforming Growth Factor Alpha	Protein Coding	P01135	59	GC02M070447	20.3747	https://www.genecards.org/cgi-bin/carddisp.pl?gene=TGFA
TPH2	Tryptophan Hydroxylase 2	Protein Coding	Q8IWU9	62	GC12P071938	20.3745	https://www.genecards.org/cgi-bin/carddisp.pl?gene=TPH2
GSTM3	Glutathione S-Transferase Mu 3	Protein Coding	P21266	58	GC01M109733	20.3739	https://www.genecards.org/cgi-bin/carddisp.pl?gene=GSTM3
NPPB	Natriuretic Peptide B	Protein Coding	P16860	56	GC01M015389	20.3644	https://www.genecards.org/cgi-bin/carddisp.pl?gene=NPPB
FYN	FYN Proto-Oncogene, Src Family Tyrosine Kinase	Protein Coding	P06241	60	GC06M111660	20.323	https://www.genecards.org/cgi-bin/carddisp.pl?gene=FYN
MIR23B	MicroRNA 23b	RNA Gene		29	GC09P095085	20.2425	https://www.genecards.org/cgi-bin/carddisp.pl?gene=MIR23B
CD55	CD55 Molecule (Cromer Blood Group)	Protein Coding	P08174	62	GC01P207321	20.2211	https://www.genecards.org/cgi-bin/carddisp.pl?gene=CD55
MIR199A1	MicroRNA 199a-1	RNA Gene		28	GC19M010817	20.2134	https://www.genecards.org/cgi-bin/carddisp.pl?gene=MIR199A1
HSPB8	Heat Shock Protein Family B (Small) Member 8	Protein Coding	Q9UJY1	58	GC12P119173	20.1583	https://www.genecards.org/cgi-bin/carddisp.pl?gene=HSPB8
P4HB	Prolyl 4-Hydroxylase Subunit Beta	Protein Coding	P07237	63	GC17M081843	20.1571	https://www.genecards.org/cgi-bin/carddisp.pl?gene=P4HB
ULK1	Unc-51 Like Autophagy Activating Kinase 1	Protein Coding	O75385	58	GC12P131894	20.1347	https://www.genecards.org/cgi-bin/carddisp.pl?gene=ULK1
POLH	DNA Polymerase Eta	Protein Coding	Q9Y253	58	GC06P043576	20.1098	https://www.genecards.org/cgi-bin/carddisp.pl?gene=POLH
MIR144	MicroRNA 144	RNA Gene		27	GC17M084703	20.0963	https://www.genecards.org/cgi-bin/carddisp.pl?gene=MIR144
MEG8	Maternally Expressed 8, Small Nucleolar RNA Host Gene	RNA Gene		28	GC14P117889	20.0771	https://www.genecards.org/cgi-bin/carddisp.pl?gene=MEG8
ECE1	Endothelin Converting Enzyme 1	Protein Coding	P42892	62	GC01M021217	20.066	https://www.genecards.org/cgi-bin/carddisp.pl?gene=ECE1
DHPS	Deoxyhypusine Synthase	Protein Coding	P49366	56	GC19M096269	20.0534	https://www.genecards.org/cgi-bin/carddisp.pl?gene=DHPS
HNMT	Histamine N-Methyltransferase	Protein Coding	P50135	58	GC02P137964	20.0423	https://www.genecards.org/cgi-bin/carddisp.pl?gene=HNMT
TRAP1	TNF Receptor Associated Protein 1	Protein Coding	Q12931	56	GC16M025748	19.969	https://www.genecards.org/cgi-bin/carddisp.pl?gene=TRAP1
PLCB4	Phospholipase C Beta 4	Protein Coding	Q15147	58	GC20P009067	19.9402	https://www.genecards.org/cgi-bin/carddisp.pl?gene=PLCB4
ATXN1	Ataxin 1	Protein Coding	P54253	57	GC06M016299	19.9355	https://www.genecards.org/cgi-bin/carddisp.pl?gene=ATXN1
MIR15B	MicroRNA 15b	RNA Gene		29	GC03P160404	19.9312	https://www.genecards.org/cgi-bin/carddisp.pl?gene=MIR15B
LINC01554	Long Intergenic Non-Protein Coding RNA 1554	RNA Gene	Q52M75	29	GC05P095838	19.9233	https://www.genecards.org/cgi-bin/carddisp.pl?gene=LINC01554
CCL11	C-C Motif Chemokine Ligand 11	Protein Coding	P51671	59	GC17P034285	19.8653	https://www.genecards.org/cgi-bin/carddisp.pl?gene=CCL11
TIA1	TIA1 Cytotoxic Granule Associated RNA Binding Protein	Protein Coding	P31483	55	GC02M070209	19.8453	https://www.genecards.org/cgi-bin/carddisp.pl?gene=TIA1
ILK	Integrin Linked Kinase	Protein Coding	Q13418	58	GC11P012587	19.8368	https://www.genecards.org/cgi-bin/carddisp.pl?gene=ILK
MIR150	MicroRNA 150	RNA Gene		31	GC19M049500	19.8147	https://www.genecards.org/cgi-bin/carddisp.pl?gene=MIR150
AGER	Advanced Glycosylation End-Product Specific Receptor	Protein Coding	Q15109	59	GC06M032180	19.8033	https://www.genecards.org/cgi-bin/carddisp.pl?gene=AGER
CAPN1	Calpain 1	Protein Coding	P07384	63	GC11P094604	19.7803	https://www.genecards.org/cgi-bin/carddisp.pl?gene=CAPN1
ABCD2	ATP Binding Cassette Subfamily D Member 2	Protein Coding	Q9UBJ2	53	GC12M039530	19.7738	https://www.genecards.org/cgi-bin/carddisp.pl?gene=ABCD2
EDN3	Endothelin 3	Protein Coding	P14138	59	GC20P059300	19.771	https://www.genecards.org/cgi-bin/carddisp.pl?gene=EDN3
HCN1	Hyperpolarization Activated Cyclic Nucleotide Gated Potassium Channel 1	Protein Coding	O60741	58	GC05M045260	19.7568	https://www.genecards.org/cgi-bin/carddisp.pl?gene=HCN1
CDKN3	Cyclin Dependent Kinase Inhibitor 3	Protein Coding	Q16667	54	GC14P054401	19.7477	https://www.genecards.org/cgi-bin/carddisp.pl?gene=CDKN3
ORAI1	ORAI Calcium Release-Activated Calcium Modulator 1	Protein Coding	Q96D31	58	GC12P134704	19.7405	https://www.genecards.org/cgi-bin/carddisp.pl?gene=ORAI1
BACE1	Beta-Secretase 1	Protein Coding	P56817	60	GC11M117285	19.7188	https://www.genecards.org/cgi-bin/carddisp.pl?gene=BACE1
CD38	CD38 Molecule	Protein Coding	P28907	59	GC04P025740	19.708	https://www.genecards.org/cgi-bin/carddisp.pl?gene=CD38
ITGA7	Integrin Subunit Alpha 7	Protein Coding	Q13683	59	GC12M055684	19.7067	https://www.genecards.org/cgi-bin/carddisp.pl?gene=ITGA7
CS	Citrate Synthase	Protein Coding	O75390	58	GC12M056271	19.7023	https://www.genecards.org/cgi-bin/carddisp.pl?gene=CS
ALPP	Alkaline Phosphatase, Placental	Protein Coding	P05187	56	GC02P232378	19.68	https://www.genecards.org/cgi-bin/carddisp.pl?gene=ALPP
PRUNE1	Prune Exopolyphosphatase 1	Protein Coding	Q86TP1	52	GC01P151008	19.6535	https://www.genecards.org/cgi-bin/carddisp.pl?gene=PRUNE1
TDP2	Tyrosyl-DNA Phosphodiesterase 2	Protein Coding	O95551	56	GC06M024651	19.6524	https://www.genecards.org/cgi-bin/carddisp.pl?gene=TDP2
CTSB	Cathepsin B	Protein Coding	P07858	64	GC08M011842	19.6169	https://www.genecards.org/cgi-bin/carddisp.pl?gene=CTSB
PRKCB	Protein Kinase C Beta	Protein Coding	P05771	62	GC16P096397	19.615	https://www.genecards.org/cgi-bin/carddisp.pl?gene=PRKCB
SERPINI1	Serpin Family I Member 1	Protein Coding	Q99574	59	GC03P167735	19.5991	https://www.genecards.org/cgi-bin/carddisp.pl?gene=SERPINI1
PRKD1	Protein Kinase D1	Protein Coding	Q15139	62	GC14M029576	19.5964	https://www.genecards.org/cgi-bin/carddisp.pl?gene=PRKD1
CD27	CD27 Molecule	Protein Coding	P26842	59	GC12P042087	19.5736	https://www.genecards.org/cgi-bin/carddisp.pl?gene=CD27
TRPV1	Transient Receptor Potential Cation Channel Subfamily V Member 1	Protein Coding	Q8NER1	61	GC17M003565	19.5252	https://www.genecards.org/cgi-bin/carddisp.pl?gene=TRPV1
ITIH4	Inter-Alpha-Trypsin Inhibitor Heavy Chain 4	Protein Coding	Q14624	55	GC03M052812	19.5032	https://www.genecards.org/cgi-bin/carddisp.pl?gene=ITIH4
BMPR1B	Bone Morphogenetic Protein Receptor Type 1B	Protein Coding	O00238	62	GC04P094757	19.4997	https://www.genecards.org/cgi-bin/carddisp.pl?gene=BMPR1B
MTPAP	Mitochondrial Poly(A) Polymerase	Protein Coding	Q9NVV4	52	GC10M036033	19.4968	https://www.genecards.org/cgi-bin/carddisp.pl?gene=MTPAP
MIR30E	MicroRNA 30e	RNA Gene		32	GC01P040754	19.4958	https://www.genecards.org/cgi-bin/carddisp.pl?gene=MIR30E
ATP2C1	ATPase Secretory Pathway Ca2+ Transporting 1	Protein Coding	P98194	55	GC03P130850	19.4942	https://www.genecards.org/cgi-bin/carddisp.pl?gene=ATP2C1
PLA2G2A	Phospholipase A2 Group IIA	Protein Coding	P14555	59	GC01M019975	19.4867	https://www.genecards.org/cgi-bin/carddisp.pl?gene=PLA2G2A
FGG	Fibrinogen Gamma Chain	Protein Coding	P02679	61	GC04M154604	19.4808	https://www.genecards.org/cgi-bin/carddisp.pl?gene=FGG
CAST	Calpastatin	Protein Coding	P20810	61	GC05P095975	19.424	https://www.genecards.org/cgi-bin/carddisp.pl?gene=CAST
GRM7	Glutamate Metabotropic Receptor 7	Protein Coding	Q14831	58	GC03P006770	19.4218	https://www.genecards.org/cgi-bin/carddisp.pl?gene=GRM7
SLC12A5	Solute Carrier Family 12 Member 5	Protein Coding	Q9H2X9	61	GC20P046021	19.4038	https://www.genecards.org/cgi-bin/carddisp.pl?gene=SLC12A5
CYLD	CYLD Lysine 63 Deubiquitinase	Protein Coding	Q9NQC7	60	GC16P050742	19.3373	https://www.genecards.org/cgi-bin/carddisp.pl?gene=CYLD
DPP6	Dipeptidyl Peptidase Like 6	Protein Coding	P42658	58	GC07P153748	19.3167	https://www.genecards.org/cgi-bin/carddisp.pl?gene=DPP6
FAM20C	FAM20C Golgi Associated Secretory Pathway Kinase	Protein Coding	Q8IXL6	58	GC07P000192	19.2856	https://www.genecards.org/cgi-bin/carddisp.pl?gene=FAM20C
PRTN3	Proteinase 3	Protein Coding	P24158	59	GC19P000840	19.2273	https://www.genecards.org/cgi-bin/carddisp.pl?gene=PRTN3
SYK	Spleen Associated Tyrosine Kinase	Protein Coding	P43405	64	GC09P101996	19.2215	https://www.genecards.org/cgi-bin/carddisp.pl?gene=SYK
GMPPA	GDP-Mannose Pyrophosphorylase A	Protein Coding	Q96IJ6	53	GC02P219498	19.1633	https://www.genecards.org/cgi-bin/carddisp.pl?gene=GMPPA
APOH	Apolipoprotein H	Protein Coding	P02749	58	GC17M066212	19.1627	https://www.genecards.org/cgi-bin/carddisp.pl?gene=APOH
SIRT2	Sirtuin 2	Protein Coding	Q8IXJ6	60	GC19M038878	19.1132	https://www.genecards.org/cgi-bin/carddisp.pl?gene=SIRT2
ENO2	Enolase 2	Protein Coding	P09104	60	GC12P006913	19.101	https://www.genecards.org/cgi-bin/carddisp.pl?gene=ENO2
TMEM106B	Transmembrane Protein 106B	Protein Coding	Q9NUM4	52	GC07P014077	19.0808	https://www.genecards.org/cgi-bin/carddisp.pl?gene=TMEM106B
LSS	Lanosterol Synthase	Protein Coding	P48449	58	GC21M053913	19.052	https://www.genecards.org/cgi-bin/carddisp.pl?gene=LSS
IGF2R	Insulin Like Growth Factor 2 Receptor	Protein Coding	P11717	60	GC06P159969	19.0414	https://www.genecards.org/cgi-bin/carddisp.pl?gene=IGF2R
TJP1	Tight Junction Protein 1	Protein Coding	Q07157	58	GC15M029699	19.0402	https://www.genecards.org/cgi-bin/carddisp.pl?gene=TJP1
POFUT1	Protein O-Fucosyltransferase 1	Protein Coding	Q9H488	58	GC20P032207	19.0192	https://www.genecards.org/cgi-bin/carddisp.pl?gene=POFUT1
SLC30A8	Solute Carrier Family 30 Member 8	Protein Coding	Q8IWU4	54	GC08P116950	19.0119	https://www.genecards.org/cgi-bin/carddisp.pl?gene=SLC30A8
SYT1	Synaptotagmin 1	Protein Coding	P21579	61	GC12P078863	18.9959	https://www.genecards.org/cgi-bin/carddisp.pl?gene=SYT1
RPS6KB1	Ribosomal Protein S6 Kinase B1	Protein Coding	P23443	63	GC17P059893	18.9657	https://www.genecards.org/cgi-bin/carddisp.pl?gene=RPS6KB1
EFHC1	EF-Hand Domain Containing 1	Protein Coding	Q5JVL4	53	GC06P052362	18.9184	https://www.genecards.org/cgi-bin/carddisp.pl?gene=EFHC1
TRC-GCA24-1	TRNA-Cys (GCA) 24-1	RNA Gene		14	GC17M085080	18.91	https://www.genecards.org/cgi-bin/carddisp.pl?gene=TRC-GCA24-1
GNAI1	G Protein Subunit Alpha I1	Protein Coding	P63096	60	GC07P088666	18.8538	https://www.genecards.org/cgi-bin/carddisp.pl?gene=GNAI1
GRID2	Glutamate Ionotropic Receptor Delta Type Subunit 2	Protein Coding	O43424	58	GC04P092304	18.8527	https://www.genecards.org/cgi-bin/carddisp.pl?gene=GRID2
RNY5	RNA, Ro60-Associated Y5	RNA Gene		18	GC07P148941	18.793	https://www.genecards.org/cgi-bin/carddisp.pl?gene=RNY5
S100A9	S100 Calcium Binding Protein A9	Protein Coding	P06702	56	GC01P153357	18.7507	https://www.genecards.org/cgi-bin/carddisp.pl?gene=S100A9
SULT1A3	Sulfotransferase Family 1A Member 3	Protein Coding	P0DMM9	47	GC16P030199	18.736	https://www.genecards.org/cgi-bin/carddisp.pl?gene=SULT1A3
CHSY1	Chondroitin Sulfate Synthase 1	Protein Coding	Q86X52	55	GC15M101175	18.7196	https://www.genecards.org/cgi-bin/carddisp.pl?gene=CHSY1
UGT2B7	UDP Glucuronosyltransferase Family 2 Member B7	Protein Coding	P16662	56	GC04P069051	18.7127	https://www.genecards.org/cgi-bin/carddisp.pl?gene=UGT2B7
UNG	Uracil DNA Glycosylase	Protein Coding	P13051	59	GC12P109097	18.6884	https://www.genecards.org/cgi-bin/carddisp.pl?gene=UNG
MIR125B1	MicroRNA 125b-1	RNA Gene		31	GC11M130263	18.6765	https://www.genecards.org/cgi-bin/carddisp.pl?gene=MIR125B1
BIRC3	Baculoviral IAP Repeat Containing 3	Protein Coding	Q13489	58	GC11P102317	18.673	https://www.genecards.org/cgi-bin/carddisp.pl?gene=BIRC3
SLX1A-SULT1A3	SLX1A-SULT1A3 Readthrough (NMD Candidate)	RNA Gene		21	GC16P096698	18.6608	https://www.genecards.org/cgi-bin/carddisp.pl?gene=SLX1A-SULT1A3
CACNA2D2	Calcium Voltage-Gated Channel Auxiliary Subunit Alpha2delta 2	Protein Coding	Q9NY47	55	GC03M054104	18.6486	https://www.genecards.org/cgi-bin/carddisp.pl?gene=CACNA2D2
HSF1	Heat Shock Transcription Factor 1	Protein Coding	Q00613	59	GC08P144291	18.6154	https://www.genecards.org/cgi-bin/carddisp.pl?gene=HSF1
MAP3K7	Mitogen-Activated Protein Kinase Kinase Kinase 7	Protein Coding	O43318	64	GC06M090513	18.5617	https://www.genecards.org/cgi-bin/carddisp.pl?gene=MAP3K7
PLCG1	Phospholipase C Gamma 1	Protein Coding	P19174	62	GC20P041136	18.5482	https://www.genecards.org/cgi-bin/carddisp.pl?gene=PLCG1
OXT	Oxytocin/Neurophysin I Prepropeptide	Protein Coding	P01178	51	GC20P008958	18.505	https://www.genecards.org/cgi-bin/carddisp.pl?gene=OXT
KCNK9	Potassium Two Pore Domain Channel Subfamily K Member 9	Protein Coding	Q9NPC2	59	GC08M139585	18.4632	https://www.genecards.org/cgi-bin/carddisp.pl?gene=KCNK9
CXCR2	C-X-C Motif Chemokine Receptor 2	Protein Coding	P25025	63	GC02P218125	18.4497	https://www.genecards.org/cgi-bin/carddisp.pl?gene=CXCR2
CYB5A	Cytochrome B5 Type A	Protein Coding	P00167	55	GC18M074250	18.4385	https://www.genecards.org/cgi-bin/carddisp.pl?gene=CYB5A
GOT1	Glutamic-Oxaloacetic Transaminase 1	Protein Coding	P17174	58	GC10M099396	18.4269	https://www.genecards.org/cgi-bin/carddisp.pl?gene=GOT1
MIR193A	MicroRNA 193a	RNA Gene		29	GC17P031559	18.3978	https://www.genecards.org/cgi-bin/carddisp.pl?gene=MIR193A
MIR483	MicroRNA 483	RNA Gene		29	GC11M012585	18.3905	https://www.genecards.org/cgi-bin/carddisp.pl?gene=MIR483
PLAUR	Plasminogen Activator, Urokinase Receptor	Protein Coding	Q03405	57	GC19M043646	18.3837	https://www.genecards.org/cgi-bin/carddisp.pl?gene=PLAUR
SPG21	SPG21 Abhydrolase Domain Containing, Maspardin	Protein Coding	Q9NZD8	49	GC15M064963	18.3408	https://www.genecards.org/cgi-bin/carddisp.pl?gene=SPG21
BMI1	BMI1 Proto-Oncogene, Polycomb Ring Finger	Protein Coding	P35226	55	GC10P022353	18.3288	https://www.genecards.org/cgi-bin/carddisp.pl?gene=BMI1
GPX3	Glutathione Peroxidase 3	Protein Coding	P22352	53	GC05P153815	18.3107	https://www.genecards.org/cgi-bin/carddisp.pl?gene=GPX3
CTNND1	Catenin Delta 1	Protein Coding	O60716	58	GC11P058855	18.3097	https://www.genecards.org/cgi-bin/carddisp.pl?gene=CTNND1
SP3	Sp3 Transcription Factor	Protein Coding	Q02447	54	GC02M173882	18.2539	https://www.genecards.org/cgi-bin/carddisp.pl?gene=SP3
NEK11	NIMA Related Kinase 11	Protein Coding	Q8NG66	44	GC03P131026	18.2417	https://www.genecards.org/cgi-bin/carddisp.pl?gene=NEK11
TOMM40	Translocase Of Outer Mitochondrial Membrane 40	Protein Coding	O96008	52	GC19P044890	18.2366	https://www.genecards.org/cgi-bin/carddisp.pl?gene=TOMM40
ABO	ABO, Alpha 1-3-N-Acetylgalactosaminyltransferase And Alpha 1-3-Galactosyltransferase	Protein Coding	P16442	45	GC09M133250	18.2315	https://www.genecards.org/cgi-bin/carddisp.pl?gene=ABO
CHKA	Choline Kinase Alpha	Protein Coding	P35790	55	GC11M068052	18.2255	https://www.genecards.org/cgi-bin/carddisp.pl?gene=CHKA
CCNB1	Cyclin B1	Protein Coding	P14635	60	GC05P069167	18.19	https://www.genecards.org/cgi-bin/carddisp.pl?gene=CCNB1
GRIA1	Glutamate Ionotropic Receptor AMPA Type Subunit 1	Protein Coding	P42261	63	GC05P153489	18.1879	https://www.genecards.org/cgi-bin/carddisp.pl?gene=GRIA1
KAT5	Lysine Acetyltransferase 5	Protein Coding	Q92993	62	GC11P065711	18.1275	https://www.genecards.org/cgi-bin/carddisp.pl?gene=KAT5
RRM1	Ribonucleotide Reductase Catalytic Subunit M1	Protein Coding	P23921	63	GC11P012447	18.1132	https://www.genecards.org/cgi-bin/carddisp.pl?gene=RRM1
MIR9-1	MicroRNA 9-1	RNA Gene		29	GC01M156420	18.0913	https://www.genecards.org/cgi-bin/carddisp.pl?gene=MIR9-1
SFTPD	Surfactant Protein D	Protein Coding	P35247	56	GC10M079937	18.0865	https://www.genecards.org/cgi-bin/carddisp.pl?gene=SFTPD
KRT19	Keratin 19	Protein Coding	P08727	58	GC17M041523	18.0851	https://www.genecards.org/cgi-bin/carddisp.pl?gene=KRT19
PON3	Paraoxonase 3	Protein Coding	Q15166	57	GC07M095359	18.0119	https://www.genecards.org/cgi-bin/carddisp.pl?gene=PON3
HBG2	Hemoglobin Subunit Gamma 2	Protein Coding	P69892	55	GC11M012715	17.9959	https://www.genecards.org/cgi-bin/carddisp.pl?gene=HBG2
MIR324	MicroRNA 324	RNA Gene		30	GC17M007223	17.9954	https://www.genecards.org/cgi-bin/carddisp.pl?gene=MIR324
FERMT3	FERM Domain Containing Kindlin 3	Protein Coding	Q86UX7	55	GC11P094478	17.9916	https://www.genecards.org/cgi-bin/carddisp.pl?gene=FERMT3
ANXA11	Annexin A11	Protein Coding	P50995	55	GC10M080150	17.98	https://www.genecards.org/cgi-bin/carddisp.pl?gene=ANXA11
PIK3C3	Phosphatidylinositol 3-Kinase Catalytic Subunit Type 3	Protein Coding	Q8NEB9	62	GC18P041955	17.9766	https://www.genecards.org/cgi-bin/carddisp.pl?gene=PIK3C3
CCR2	C-C Motif Chemokine Receptor 2	Protein Coding	P41597	58	GC03P059719	17.9251	https://www.genecards.org/cgi-bin/carddisp.pl?gene=CCR2
TREH	Trehalase	Protein Coding	O43280	56	GC11M118657	17.9116	https://www.genecards.org/cgi-bin/carddisp.pl?gene=TREH
SNAI1	Snail Family Transcriptional Repressor 1	Protein Coding	O95863	57	GC20P049982	17.8684	https://www.genecards.org/cgi-bin/carddisp.pl?gene=SNAI1
CHIT1	Chitinase 1	Protein Coding	Q13231	56	GC01M203213	17.8384	https://www.genecards.org/cgi-bin/carddisp.pl?gene=CHIT1
RAP1B	RAP1B, Member Of RAS Oncogene Family	Protein Coding	P61224	58	GC12P068610	17.8375	https://www.genecards.org/cgi-bin/carddisp.pl?gene=RAP1B
ITGA4	Integrin Subunit Alpha 4	Protein Coding	P13612	62	GC02P181475	17.8098	https://www.genecards.org/cgi-bin/carddisp.pl?gene=ITGA4
AXL	AXL Receptor Tyrosine Kinase	Protein Coding	P30530	64	GC19P041219	17.8048	https://www.genecards.org/cgi-bin/carddisp.pl?gene=AXL
CD9	CD9 Molecule	Protein Coding	P21926	56	GC12P042075	17.7939	https://www.genecards.org/cgi-bin/carddisp.pl?gene=CD9
GRIA4	Glutamate Ionotropic Receptor AMPA Type Subunit 4	Protein Coding	P48058	62	GC11P105609	17.7564	https://www.genecards.org/cgi-bin/carddisp.pl?gene=GRIA4
ANPEP	Alanyl Aminopeptidase, Membrane	Protein Coding	P15144	62	GC15M089784	17.7461	https://www.genecards.org/cgi-bin/carddisp.pl?gene=ANPEP
SHC1	SHC Adaptor Protein 1	Protein Coding	P29353	58	GC01M154962	17.7339	https://www.genecards.org/cgi-bin/carddisp.pl?gene=SHC1
ROGDI	Rogdi Atypical Leucine Zipper	Protein Coding	Q9GZN7	50	GC16M004796	17.7079	https://www.genecards.org/cgi-bin/carddisp.pl?gene=ROGDI
RAN	RAN, Member RAS Oncogene Family	Protein Coding	P62826	56	GC12P134893	17.683	https://www.genecards.org/cgi-bin/carddisp.pl?gene=RAN
APAF1	Apoptotic Peptidase Activating Factor 1	Protein Coding	O14727	60	GC12P098645	17.6758	https://www.genecards.org/cgi-bin/carddisp.pl?gene=APAF1
REL	REL Proto-Oncogene, NF-KB Subunit	Protein Coding	Q04864	60	GC02P060881	17.6585	https://www.genecards.org/cgi-bin/carddisp.pl?gene=REL
GLO1	Glyoxalase I	Protein Coding	Q04760	58	GC06M097273	17.6508	https://www.genecards.org/cgi-bin/carddisp.pl?gene=GLO1
MIR149	MicroRNA 149	RNA Gene		32	GC02P240456	17.6078	https://www.genecards.org/cgi-bin/carddisp.pl?gene=MIR149
NEK4	NIMA Related Kinase 4	Protein Coding	P51957	50	GC03M052708	17.6037	https://www.genecards.org/cgi-bin/carddisp.pl?gene=NEK4
MIR29B1	MicroRNA 29b-1	RNA Gene		29	GC07M130877	17.5804	https://www.genecards.org/cgi-bin/carddisp.pl?gene=MIR29B1
PPP2R2B	Protein Phosphatase 2 Regulatory Subunit Bbeta	Protein Coding	Q00005	57	GC05M146582	17.5493	https://www.genecards.org/cgi-bin/carddisp.pl?gene=PPP2R2B
TNFSF13B	TNF Superfamily Member 13b	Protein Coding	Q9Y275	58	GC13P108251	17.5391	https://www.genecards.org/cgi-bin/carddisp.pl?gene=TNFSF13B
CD28	CD28 Molecule	Protein Coding	P10747	59	GC02P203706	17.5363	https://www.genecards.org/cgi-bin/carddisp.pl?gene=CD28
IFNL3	Interferon Lambda 3	Protein Coding	Q8IZI9	49	GC19M039243	17.5355	https://www.genecards.org/cgi-bin/carddisp.pl?gene=IFNL3
SELENOI	Selenoprotein I	Protein Coding	Q9C0D9	50	GC02P026683	17.5197	https://www.genecards.org/cgi-bin/carddisp.pl?gene=SELENOI
ENO1	Enolase 1	Protein Coding	P06733	60	GC01M008861	17.4955	https://www.genecards.org/cgi-bin/carddisp.pl?gene=ENO1
LIF	LIF Interleukin 6 Family Cytokine	Protein Coding	P15018	56	GC22M030240	17.4678	https://www.genecards.org/cgi-bin/carddisp.pl?gene=LIF
CLDN1	Claudin 1	Protein Coding	O95832	59	GC03M190305	17.4517	https://www.genecards.org/cgi-bin/carddisp.pl?gene=CLDN1
APBB1	Amyloid Beta Precursor Protein Binding Family B Member 1	Protein Coding	O00213	55	GC11M012775	17.4436	https://www.genecards.org/cgi-bin/carddisp.pl?gene=APBB1
GRB2	Growth Factor Receptor Bound Protein 2	Protein Coding	P62993	59	GC17M075318	17.4414	https://www.genecards.org/cgi-bin/carddisp.pl?gene=GRB2
TBXA2R	Thromboxane A2 Receptor	Protein Coding	P21731	63	GC19M003594	17.4336	https://www.genecards.org/cgi-bin/carddisp.pl?gene=TBXA2R
TRP-AGG2-5	TRNA-Pro (Anticodon AGG) 2-5	RNA Gene		18	GC14M027337	17.3972	https://www.genecards.org/cgi-bin/carddisp.pl?gene=TRP-AGG2-5
JPH3	Junctophilin 3	Protein Coding	Q8WXH2	54	GC16P087601	17.3928	https://www.genecards.org/cgi-bin/carddisp.pl?gene=JPH3
SLC25A24	Solute Carrier Family 25 Member 24	Protein Coding	Q6NUK1	54	GC01M108134	17.332	https://www.genecards.org/cgi-bin/carddisp.pl?gene=SLC25A24
GOLGA2	Golgin A2	Protein Coding	Q08379	55	GC09M128255	17.3305	https://www.genecards.org/cgi-bin/carddisp.pl?gene=GOLGA2
ABCC4	ATP Binding Cassette Subfamily C Member 4 (PEL Blood Group)	Protein Coding	O15439	59	GC13M095019	17.3254	https://www.genecards.org/cgi-bin/carddisp.pl?gene=ABCC4
ADAM10	ADAM Metallopeptidase Domain 10	Protein Coding	O14672	67	GC15M058588	17.3052	https://www.genecards.org/cgi-bin/carddisp.pl?gene=ADAM10
HSP90B1	Heat Shock Protein 90 Beta Family Member 1	Protein Coding	P14625	60	GC12P103930	17.2811	https://www.genecards.org/cgi-bin/carddisp.pl?gene=HSP90B1
CAMK2G	Calcium/Calmodulin Dependent Protein Kinase II Gamma	Protein Coding	Q13555	62	GC10M073812	17.2609	https://www.genecards.org/cgi-bin/carddisp.pl?gene=CAMK2G
ITGAL	Integrin Subunit Alpha L	Protein Coding	P20701	60	GC16P030472	17.2364	https://www.genecards.org/cgi-bin/carddisp.pl?gene=ITGAL
CCL3	C-C Motif Chemokine Ligand 3	Protein Coding	P10147	54	GC17M036088	17.2128	https://www.genecards.org/cgi-bin/carddisp.pl?gene=CCL3
C1S	Complement C1s	Protein Coding	P09871	60	GC12P042133	17.1989	https://www.genecards.org/cgi-bin/carddisp.pl?gene=C1S
MIR25	MicroRNA 25	RNA Gene		29	GC07M100093	17.1848	https://www.genecards.org/cgi-bin/carddisp.pl?gene=MIR25
PDXK	Pyridoxal Kinase	Protein Coding	O00764	57	GC21P043719	17.1623	https://www.genecards.org/cgi-bin/carddisp.pl?gene=PDXK
SORT1	Sortilin 1	Protein Coding	Q99523	58	GC01M109310	17.0973	https://www.genecards.org/cgi-bin/carddisp.pl?gene=SORT1
DAXX	Death Domain Associated Protein	Protein Coding	Q9UER7	57	GC06M033318	17.0574	https://www.genecards.org/cgi-bin/carddisp.pl?gene=DAXX
KLK14	Kallikrein Related Peptidase 14	Protein Coding	Q9P0G3	50	GC19M051077	17.0566	https://www.genecards.org/cgi-bin/carddisp.pl?gene=KLK14
PWAR1	Prader Willi/Angelman Region RNA 1	RNA Gene		22	GC15P025135	17.0417	https://www.genecards.org/cgi-bin/carddisp.pl?gene=PWAR1
TXNRD1	Thioredoxin Reductase 1	Protein Coding	Q16881	55	GC12P104215	17.0064	https://www.genecards.org/cgi-bin/carddisp.pl?gene=TXNRD1
GPX2	Glutathione Peroxidase 2	Protein Coding	P18283	54	GC14M064939	16.9905	https://www.genecards.org/cgi-bin/carddisp.pl?gene=GPX2
HCN2	Hyperpolarization Activated Cyclic Nucleotide Gated Potassium And Sodium Channel 2	Protein Coding	Q9UL51	59	GC19P000589	16.9825	https://www.genecards.org/cgi-bin/carddisp.pl?gene=HCN2
S100B	S100 Calcium Binding Protein B	Protein Coding	P04271	58	GC21M053916	16.9697	https://www.genecards.org/cgi-bin/carddisp.pl?gene=S100B
UGP2	UDP-Glucose Pyrophosphorylase 2	Protein Coding	Q16851	56	GC02P063840	16.9564	https://www.genecards.org/cgi-bin/carddisp.pl?gene=UGP2
MIR10A	MicroRNA 10a	RNA Gene		30	GC17M048579	16.9028	https://www.genecards.org/cgi-bin/carddisp.pl?gene=MIR10A
ME2	Malic Enzyme 2	Protein Coding	P23368	57	GC18P050879	16.8636	https://www.genecards.org/cgi-bin/carddisp.pl?gene=ME2
PPM1B	Protein Phosphatase, Mg2+/Mn2+ Dependent 1B	Protein Coding	O75688	56	GC02P044167	16.8585	https://www.genecards.org/cgi-bin/carddisp.pl?gene=PPM1B
IGFBP7	Insulin Like Growth Factor Binding Protein 7	Protein Coding	Q16270	58	GC04M057030	16.832	https://www.genecards.org/cgi-bin/carddisp.pl?gene=IGFBP7
CCL4	C-C Motif Chemokine Ligand 4	Protein Coding	P13236	53	GC17P036103	16.8123	https://www.genecards.org/cgi-bin/carddisp.pl?gene=CCL4
HIP1	Huntingtin Interacting Protein 1	Protein Coding	O00291	55	GC07M075533	16.8078	https://www.genecards.org/cgi-bin/carddisp.pl?gene=HIP1
CSMD1	CUB And Sushi Multiple Domains 1	Protein Coding	Q96PZ7	50	GC08M002953	16.8022	https://www.genecards.org/cgi-bin/carddisp.pl?gene=CSMD1
SCGB1A1	Secretoglobin Family 1A Member 1	Protein Coding	P11684	54	GC11P062405	16.7155	https://www.genecards.org/cgi-bin/carddisp.pl?gene=SCGB1A1
TRPC6	Transient Receptor Potential Cation Channel Subfamily C Member 6	Protein Coding	Q9Y210	62	GC11M101451	16.7026	https://www.genecards.org/cgi-bin/carddisp.pl?gene=TRPC6
IL1RAPL2	Interleukin 1 Receptor Accessory Protein Like 2	Protein Coding	Q9NP60	52	GC0XP104566	16.6941	https://www.genecards.org/cgi-bin/carddisp.pl?gene=IL1RAPL2
SULT2A1	Sulfotransferase Family 2A Member 1	Protein Coding	Q06520	55	GC19M047870	16.6414	https://www.genecards.org/cgi-bin/carddisp.pl?gene=SULT2A1
SAG	S-Antigen Visual Arrestin	Protein Coding	P10523	58	GC02P233663	16.6258	https://www.genecards.org/cgi-bin/carddisp.pl?gene=SAG
PDE5A	Phosphodiesterase 5A	Protein Coding	O76074	58	GC04M119494	16.6209	https://www.genecards.org/cgi-bin/carddisp.pl?gene=PDE5A
NEDD4	NEDD4 E3 Ubiquitin Protein Ligase	Protein Coding	P46934	60	GC15M055826	16.6151	https://www.genecards.org/cgi-bin/carddisp.pl?gene=NEDD4
ACVR2B	Activin A Receptor Type 2B	Protein Coding	Q13705	62	GC03P038453	16.5675	https://www.genecards.org/cgi-bin/carddisp.pl?gene=ACVR2B
UQCRFS1	Ubiquinol-Cytochrome C Reductase, Rieske Iron-Sulfur Polypeptide 1	Protein Coding	P47985	59	GC19M029205	16.561	https://www.genecards.org/cgi-bin/carddisp.pl?gene=UQCRFS1
ALPI	Alkaline Phosphatase, Intestinal	Protein Coding	P09923	60	GC02P232456	16.5476	https://www.genecards.org/cgi-bin/carddisp.pl?gene=ALPI
CCNF	Cyclin F	Protein Coding	P41002	51	GC16P002429	16.5432	https://www.genecards.org/cgi-bin/carddisp.pl?gene=CCNF
MIR423	MicroRNA 423	RNA Gene		28	GC17P030117	16.5327	https://www.genecards.org/cgi-bin/carddisp.pl?gene=MIR423
IFNA2	Interferon Alpha 2	Protein Coding	P01563	55	GC09M021384	16.4572	https://www.genecards.org/cgi-bin/carddisp.pl?gene=IFNA2
TRPC3	Transient Receptor Potential Cation Channel Subfamily C Member 3	Protein Coding	Q13507	58	GC04M121879	16.4368	https://www.genecards.org/cgi-bin/carddisp.pl?gene=TRPC3
CYP26A1	Cytochrome P450 Family 26 Subfamily A Member 1	Protein Coding	O43174	55	GC10P093073	16.4308	https://www.genecards.org/cgi-bin/carddisp.pl?gene=CYP26A1
POLR2L	RNA Polymerase II, I And III Subunit L	Protein Coding	P62875	51	GC11M012521	16.3885	https://www.genecards.org/cgi-bin/carddisp.pl?gene=POLR2L
PPIB	Peptidylprolyl Isomerase B	Protein Coding	P23284	63	GC15M064155	16.3454	https://www.genecards.org/cgi-bin/carddisp.pl?gene=PPIB
TRAF3	TNF Receptor Associated Factor 3	Protein Coding	Q13114	59	GC14P116951	16.3379	https://www.genecards.org/cgi-bin/carddisp.pl?gene=TRAF3
MIR193B	MicroRNA 193b	RNA Gene		30	GC16P096067	16.2946	https://www.genecards.org/cgi-bin/carddisp.pl?gene=MIR193B
NTS	Neurotensin	Protein Coding	P30990	54	GC12P085876	16.2819	https://www.genecards.org/cgi-bin/carddisp.pl?gene=NTS
DIABLO	Diablo IAP-Binding Mitochondrial Protein	Protein Coding	Q9NR28	59	GC12M123845	16.2819	https://www.genecards.org/cgi-bin/carddisp.pl?gene=DIABLO
CGA	Glycoprotein Hormones, Alpha Polypeptide	Protein Coding	P01215	58	GC06M087085	16.28	https://www.genecards.org/cgi-bin/carddisp.pl?gene=CGA
PPP1CC	Protein Phosphatase 1 Catalytic Subunit Gamma	Protein Coding	P36873	58	GC12M110720	16.2571	https://www.genecards.org/cgi-bin/carddisp.pl?gene=PPP1CC
TDP1	Tyrosyl-DNA Phosphodiesterase 1	Protein Coding	Q9NUW8	57	GC14P089954	16.2246	https://www.genecards.org/cgi-bin/carddisp.pl?gene=TDP1
MIR192	MicroRNA 192	RNA Gene		31	GC11M064891	16.2234	https://www.genecards.org/cgi-bin/carddisp.pl?gene=MIR192
PDE3A	Phosphodiesterase 3A	Protein Coding	Q14432	60	GC12P043236	16.2182	https://www.genecards.org/cgi-bin/carddisp.pl?gene=PDE3A
SELENBP1	Selenium Binding Protein 1	Protein Coding	Q13228	55	GC01M151364	16.1496	https://www.genecards.org/cgi-bin/carddisp.pl?gene=SELENBP1
CXCL1	C-X-C Motif Chemokine Ligand 1	Protein Coding	P09341	56	GC04P073869	16.1021	https://www.genecards.org/cgi-bin/carddisp.pl?gene=CXCL1
FOXL2	Forkhead Box L2	Protein Coding	P58012	52	GC03M138944	16.0934	https://www.genecards.org/cgi-bin/carddisp.pl?gene=FOXL2
PITRM1	Pitrilysin Metallopeptidase 1	Protein Coding	Q5JRX3	54	GC10M003138	16.0728	https://www.genecards.org/cgi-bin/carddisp.pl?gene=PITRM1
MIR532	MicroRNA 532	RNA Gene		25	GC0XP058460	16.0642	https://www.genecards.org/cgi-bin/carddisp.pl?gene=MIR532
MIR181A1	MicroRNA 181a-1	RNA Gene		28	GC01M198860	16.0521	https://www.genecards.org/cgi-bin/carddisp.pl?gene=MIR181A1
FABP3	Fatty Acid Binding Protein 3	Protein Coding	P05413	57	GC01M031934	16.0487	https://www.genecards.org/cgi-bin/carddisp.pl?gene=FABP3
TXNIP	Thioredoxin Interacting Protein	Protein Coding	Q9H3M7	52	GC01M145992	16.0483	https://www.genecards.org/cgi-bin/carddisp.pl?gene=TXNIP
ANXA1	Annexin A1	Protein Coding	P04083	60	GC09P073151	16.0429	https://www.genecards.org/cgi-bin/carddisp.pl?gene=ANXA1
PPP1CA	Protein Phosphatase 1 Catalytic Subunit Alpha	Protein Coding	P62136	61	GC11M129106	16.0244	https://www.genecards.org/cgi-bin/carddisp.pl?gene=PPP1CA
ERN1	Endoplasmic Reticulum To Nucleus Signaling 1	Protein Coding	O75460	60	GC17M064039	16.0214	https://www.genecards.org/cgi-bin/carddisp.pl?gene=ERN1
MIR485	MicroRNA 485	RNA Gene		27	GC14P117919	15.9952	https://www.genecards.org/cgi-bin/carddisp.pl?gene=MIR485
SELL	Selectin L	Protein Coding	P14151	55	GC01M169690	15.9826	https://www.genecards.org/cgi-bin/carddisp.pl?gene=SELL
GABBR1	Gamma-Aminobutyric Acid Type B Receptor Subunit 1	Protein Coding	Q9UBS5	62	GC06M029555	15.9637	https://www.genecards.org/cgi-bin/carddisp.pl?gene=GABBR1
ACP1	Acid Phosphatase 1	Protein Coding	P24666	55	GC02P000934	15.9447	https://www.genecards.org/cgi-bin/carddisp.pl?gene=ACP1
CA9	Carbonic Anhydrase 9	Protein Coding	Q16790	59	GC09P035673	15.9033	https://www.genecards.org/cgi-bin/carddisp.pl?gene=CA9
WARS1	Tryptophanyl-TRNA Synthetase 1	Protein Coding	P23381	59	GC14M120962	15.8982	https://www.genecards.org/cgi-bin/carddisp.pl?gene=WARS1
AKR1C1	Aldo-Keto Reductase Family 1 Member C1	Protein Coding	Q04828	56	GC10P004963	15.8655	https://www.genecards.org/cgi-bin/carddisp.pl?gene=AKR1C1
EIF2S1	Eukaryotic Translation Initiation Factor 2 Subunit Alpha	Protein Coding	P05198	58	GC14P067359	15.8589	https://www.genecards.org/cgi-bin/carddisp.pl?gene=EIF2S1
MIP	Major Intrinsic Protein Of Lens Fiber	Protein Coding	P30301	52	GC12M056449	15.8414	https://www.genecards.org/cgi-bin/carddisp.pl?gene=MIP
GLS2	Glutaminase 2	Protein Coding	Q9UI32	52	GC12M056470	15.819	https://www.genecards.org/cgi-bin/carddisp.pl?gene=GLS2
NNMT	Nicotinamide N-Methyltransferase	Protein Coding	P40261	56	GC11P114257	15.8041	https://www.genecards.org/cgi-bin/carddisp.pl?gene=NNMT
TGM2	Transglutaminase 2	Protein Coding	P21980	60	GC20M038127	15.7903	https://www.genecards.org/cgi-bin/carddisp.pl?gene=TGM2
IBSP	Integrin Binding Sialoprotein	Protein Coding	P21815	51	GC04P087799	15.7582	https://www.genecards.org/cgi-bin/carddisp.pl?gene=IBSP
TRAF2	TNF Receptor Associated Factor 2	Protein Coding	Q12933	58	GC09P136881	15.7304	https://www.genecards.org/cgi-bin/carddisp.pl?gene=TRAF2
MIR486-1	MicroRNA 486-1	RNA Gene		28	GC08M041660	15.6822	https://www.genecards.org/cgi-bin/carddisp.pl?gene=MIR486-1
SV2A	Synaptic Vesicle Glycoprotein 2A	Protein Coding	Q7L0J3	58	GC01M149903	15.673	https://www.genecards.org/cgi-bin/carddisp.pl?gene=SV2A
CAV2	Caveolin 2	Protein Coding	P51636	55	GC07P116287	15.6725	https://www.genecards.org/cgi-bin/carddisp.pl?gene=CAV2
TLX1NB	TLX1 Neighbor	RNA Gene	P0CAT3	33	GC10M101090	15.6715	https://www.genecards.org/cgi-bin/carddisp.pl?gene=TLX1NB
TRH	Thyrotropin Releasing Hormone	Protein Coding	P20396	53	GC03P129974	15.6247	https://www.genecards.org/cgi-bin/carddisp.pl?gene=TRH
GUCY1A1	Guanylate Cyclase 1 Soluble Subunit Alpha 1	Protein Coding	Q02108	56	GC04P155667	15.6214	https://www.genecards.org/cgi-bin/carddisp.pl?gene=GUCY1A1
OXA1L	OXA1L Mitochondrial Inner Membrane Protein	Protein Coding	Q15070	51	GC14P022766	15.6002	https://www.genecards.org/cgi-bin/carddisp.pl?gene=OXA1L
ITGAV	Integrin Subunit Alpha V	Protein Coding	P06756	60	GC02P186589	15.5052	https://www.genecards.org/cgi-bin/carddisp.pl?gene=ITGAV
MIR342	MicroRNA 342	RNA Gene		29	GC14P100109	15.4952	https://www.genecards.org/cgi-bin/carddisp.pl?gene=MIR342
GRP	Gastrin Releasing Peptide	Protein Coding	P07492	53	GC18P059220	15.4817	https://www.genecards.org/cgi-bin/carddisp.pl?gene=GRP
CD70	CD70 Molecule	Protein Coding	P32970	56	GC19M096006	15.4493	https://www.genecards.org/cgi-bin/carddisp.pl?gene=CD70
NCAM1	Neural Cell Adhesion Molecule 1	Protein Coding	P13591	61	GC11P112961	15.4262	https://www.genecards.org/cgi-bin/carddisp.pl?gene=NCAM1
ADAM9	ADAM Metallopeptidase Domain 9	Protein Coding	Q13443	60	GC08P038996	15.4079	https://www.genecards.org/cgi-bin/carddisp.pl?gene=ADAM9
ACKR1	Atypical Chemokine Receptor 1 (Duffy Blood Group)	Protein Coding	Q16570	55	GC01P167505	15.3919	https://www.genecards.org/cgi-bin/carddisp.pl?gene=ACKR1
LACTB	Lactamase Beta	Protein Coding	P83111	51	GC15P168156	15.3498	https://www.genecards.org/cgi-bin/carddisp.pl?gene=LACTB
EEF1A1	Eukaryotic Translation Elongation Factor 1 Alpha 1	Protein Coding	P68104	56	GC06M097675	15.3427	https://www.genecards.org/cgi-bin/carddisp.pl?gene=EEF1A1
CCN1	Cellular Communication Network Factor 1	Protein Coding	O00622	53	GC01P085585	15.2834	https://www.genecards.org/cgi-bin/carddisp.pl?gene=CCN1
ABL2	ABL Proto-Oncogene 2, Non-Receptor Tyrosine Kinase	Protein Coding	P42684	56	GC01M179175	15.2796	https://www.genecards.org/cgi-bin/carddisp.pl?gene=ABL2
CRYAA	Crystallin Alpha A	Protein Coding	P02489	57	GC21P043169	15.2778	https://www.genecards.org/cgi-bin/carddisp.pl?gene=CRYAA
YWHAZ	Tyrosine 3-Monooxygenase/Tryptophan 5-Monooxygenase Activation Protein Zeta	Protein Coding	P63104	60	GC08M100942	15.2704	https://www.genecards.org/cgi-bin/carddisp.pl?gene=YWHAZ
IDE	Insulin Degrading Enzyme	Protein Coding	P14735	61	GC10M092451	15.2644	https://www.genecards.org/cgi-bin/carddisp.pl?gene=IDE
MASP2	MBL Associated Serine Protease 2	Protein Coding	O00187	59	GC01M015332	15.2606	https://www.genecards.org/cgi-bin/carddisp.pl?gene=MASP2
ITGB6	Integrin Subunit Beta 6	Protein Coding	P18564	61	GC02M160099	15.2551	https://www.genecards.org/cgi-bin/carddisp.pl?gene=ITGB6
PRDX5	Peroxiredoxin 5	Protein Coding	P30044	56	GC11P094484	15.2353	https://www.genecards.org/cgi-bin/carddisp.pl?gene=PRDX5
TOP2B	DNA Topoisomerase II Beta	Protein Coding	Q02880	57	GC03M026978	15.2317	https://www.genecards.org/cgi-bin/carddisp.pl?gene=TOP2B
POLR1A	RNA Polymerase I Subunit A	Protein Coding	O95602	55	GC02M086021	15.1808	https://www.genecards.org/cgi-bin/carddisp.pl?gene=POLR1A
IMPA1	Inositol Monophosphatase 1	Protein Coding	P29218	60	GC08M081656	15.1563	https://www.genecards.org/cgi-bin/carddisp.pl?gene=IMPA1
CDC45	Cell Division Cycle 45	Protein Coding	O75419	58	GC22P019479	15.146	https://www.genecards.org/cgi-bin/carddisp.pl?gene=CDC45
CD47	CD47 Molecule	Protein Coding	Q08722	58	GC03M108043	15.1407	https://www.genecards.org/cgi-bin/carddisp.pl?gene=CD47
CDK7	Cyclin Dependent Kinase 7	Protein Coding	P50613	59	GC05P078530	15.1273	https://www.genecards.org/cgi-bin/carddisp.pl?gene=CDK7
POLRMT	RNA Polymerase Mitochondrial	Protein Coding	O00411	54	GC19M000617	15.0295	https://www.genecards.org/cgi-bin/carddisp.pl?gene=POLRMT
CSNK2A2	Casein Kinase 2 Alpha 2	Protein Coding	P19784	57	GC16M058157	15.0175	https://www.genecards.org/cgi-bin/carddisp.pl?gene=CSNK2A2
MIR590	MicroRNA 590	RNA Gene		29	GC07P074191	14.9824	https://www.genecards.org/cgi-bin/carddisp.pl?gene=MIR590
ITPR2	Inositol 1,4,5-Trisphosphate Receptor Type 2	Protein Coding	Q14571	56	GC12M031068	14.9611	https://www.genecards.org/cgi-bin/carddisp.pl?gene=ITPR2
ADAMTSL1	ADAMTS Like 1	Protein Coding	Q8N6G6	53	GC09P017906	14.9408	https://www.genecards.org/cgi-bin/carddisp.pl?gene=ADAMTSL1
HAGH	Hydroxyacylglutathione Hydrolase	Protein Coding	Q16775	55	GC16M001795	14.893	https://www.genecards.org/cgi-bin/carddisp.pl?gene=HAGH
GABRG3	Gamma-Aminobutyric Acid Type A Receptor Subunit Gamma3	Protein Coding	Q99928	56	GC15P026971	14.8881	https://www.genecards.org/cgi-bin/carddisp.pl?gene=GABRG3
MIR330	MicroRNA 330	RNA Gene		30	GC19M097040	14.8734	https://www.genecards.org/cgi-bin/carddisp.pl?gene=MIR330
PDE4A	Phosphodiesterase 4A	Protein Coding	P27815	57	GC19P010416	14.8278	https://www.genecards.org/cgi-bin/carddisp.pl?gene=PDE4A
ACMSD	Aminocarboxymuconate Semialdehyde Decarboxylase	Protein Coding	Q8TDX5	50	GC02P134838	14.7611	https://www.genecards.org/cgi-bin/carddisp.pl?gene=ACMSD
TNFSF12	TNF Superfamily Member 12	Protein Coding	O43508	51	GC17P121921	14.7551	https://www.genecards.org/cgi-bin/carddisp.pl?gene=TNFSF12
F2R	Coagulation Factor II Thrombin Receptor	Protein Coding	P25116	59	GC05P076716	14.7173	https://www.genecards.org/cgi-bin/carddisp.pl?gene=F2R
PVALB	Parvalbumin	Protein Coding	P20472	53	GC22M036800	14.716	https://www.genecards.org/cgi-bin/carddisp.pl?gene=PVALB
MIR338	MicroRNA 338	RNA Gene		27	GC17M086431	14.7049	https://www.genecards.org/cgi-bin/carddisp.pl?gene=MIR338
GUCY2C	Guanylate Cyclase 2C	Protein Coding	P25092	58	GC12M014612	14.6994	https://www.genecards.org/cgi-bin/carddisp.pl?gene=GUCY2C
GPD2	Glycerol-3-Phosphate Dehydrogenase 2	Protein Coding	P43304	59	GC02P156408	14.6973	https://www.genecards.org/cgi-bin/carddisp.pl?gene=GPD2
FPR1	Formyl Peptide Receptor 1	Protein Coding	P21462	59	GC19M051745	14.6635	https://www.genecards.org/cgi-bin/carddisp.pl?gene=FPR1
LIG1	DNA Ligase 1	Protein Coding	P18858	59	GC19M048115	14.593	https://www.genecards.org/cgi-bin/carddisp.pl?gene=LIG1
GRM5	Glutamate Metabotropic Receptor 5	Protein Coding	P41594	60	GC11M088504	14.5701	https://www.genecards.org/cgi-bin/carddisp.pl?gene=GRM5
MIR212	MicroRNA 212	RNA Gene		29	GC17M002050	14.5365	https://www.genecards.org/cgi-bin/carddisp.pl?gene=MIR212
CACNG2	Calcium Voltage-Gated Channel Auxiliary Subunit Gamma 2	Protein Coding	Q9Y698	58	GC22M079317	14.523	https://www.genecards.org/cgi-bin/carddisp.pl?gene=CACNG2
CGB5	Chorionic Gonadotropin Subunit Beta 5	Protein Coding	P0DN86	40	GC19P049043	14.5205	https://www.genecards.org/cgi-bin/carddisp.pl?gene=CGB5
DGKD	Diacylglycerol Kinase Delta	Protein Coding	Q16760	56	GC02P233666	14.5061	https://www.genecards.org/cgi-bin/carddisp.pl?gene=DGKD
CARMN	Cardiac Mesoderm Enhancer-Associated Non-Coding RNA	RNA Gene		25	GC05P149397	14.4954	https://www.genecards.org/cgi-bin/carddisp.pl?gene=CARMN
KLLN	Killin, P53 Regulated DNA Replication Inhibitor	Protein Coding	B2CW77	43	GC10M088508	14.4582	https://www.genecards.org/cgi-bin/carddisp.pl?gene=KLLN
ADCYAP1	Adenylate Cyclase Activating Polypeptide 1	Protein Coding	P18509	55	GC18P000895	14.438	https://www.genecards.org/cgi-bin/carddisp.pl?gene=ADCYAP1
RNASE3	Ribonuclease A Family Member 3	Protein Coding	P12724	53	GC14P020891	14.3825	https://www.genecards.org/cgi-bin/carddisp.pl?gene=RNASE3
RAD51B	RAD51 Paralog B	Protein Coding	O15315	51	GC14P067819	14.3367	https://www.genecards.org/cgi-bin/carddisp.pl?gene=RAD51B
RPS6	Ribosomal Protein S6	Protein Coding	P62753	57	GC09M019375	14.323	https://www.genecards.org/cgi-bin/carddisp.pl?gene=RPS6
KIF5B	Kinesin Family Member 5B	Protein Coding	P33176	59	GC10M036080	14.3157	https://www.genecards.org/cgi-bin/carddisp.pl?gene=KIF5B
CCR3	C-C Motif Chemokine Receptor 3	Protein Coding	P51677	57	GC03P059714	14.3041	https://www.genecards.org/cgi-bin/carddisp.pl?gene=CCR3
TRPM3	Transient Receptor Potential Cation Channel Subfamily M Member 3	Protein Coding	Q9HCF6	54	GC09M070529	14.2848	https://www.genecards.org/cgi-bin/carddisp.pl?gene=TRPM3
CXCR3	C-X-C Motif Chemokine Receptor 3	Protein Coding	P49682	57	GC0XM071615	14.2468	https://www.genecards.org/cgi-bin/carddisp.pl?gene=CXCR3
SERPINA7	Serpin Family A Member 7	Protein Coding	P05543	55	GC0XM106032	14.2414	https://www.genecards.org/cgi-bin/carddisp.pl?gene=SERPINA7
MIR19B1	MicroRNA 19b-1	RNA Gene		27	GC13P091696	14.2369	https://www.genecards.org/cgi-bin/carddisp.pl?gene=MIR19B1
MAP2K4	Mitogen-Activated Protein Kinase Kinase 4	Protein Coding	P45985	60	GC17P012020	14.2339	https://www.genecards.org/cgi-bin/carddisp.pl?gene=MAP2K4
MRGPRX1	MAS Related GPR Family Member X1	Protein Coding	Q96LB2	44	GC11M018955	14.2151	https://www.genecards.org/cgi-bin/carddisp.pl?gene=MRGPRX1
DGAT2	Diacylglycerol O-Acyltransferase 2	Protein Coding	Q96PD7	55	GC11P075759	14.2126	https://www.genecards.org/cgi-bin/carddisp.pl?gene=DGAT2
AOC1	Amine Oxidase Copper Containing 1	Protein Coding	P19801	54	GC07P150824	14.1735	https://www.genecards.org/cgi-bin/carddisp.pl?gene=AOC1
IDH3A	Isocitrate Dehydrogenase (NAD(+)) 3 Catalytic Subunit Alpha	Protein Coding	P50213	55	GC15P078131	14.1588	https://www.genecards.org/cgi-bin/carddisp.pl?gene=IDH3A
PXDNL	Peroxidasin Like	Protein Coding	A1KZ92	46	GC08M051319	14.1529	https://www.genecards.org/cgi-bin/carddisp.pl?gene=PXDNL
NOX4	NADPH Oxidase 4	Protein Coding	Q9NPH5	55	GC11M089324	14.119	https://www.genecards.org/cgi-bin/carddisp.pl?gene=NOX4
TNFAIP6	TNF Alpha Induced Protein 6	Protein Coding	P98066	54	GC02P151357	14.0918	https://www.genecards.org/cgi-bin/carddisp.pl?gene=TNFAIP6
SNCB	Synuclein Beta	Protein Coding	Q16143	57	GC05M176620	14.0515	https://www.genecards.org/cgi-bin/carddisp.pl?gene=SNCB
PADI4	Peptidyl Arginine Deiminase 4	Protein Coding	Q9UM07	59	GC01P017308	14.0217	https://www.genecards.org/cgi-bin/carddisp.pl?gene=PADI4
ATP2C2	ATPase Secretory Pathway Ca2+ Transporting 2	Protein Coding	O75185	53	GC16P084368	14.0136	https://www.genecards.org/cgi-bin/carddisp.pl?gene=ATP2C2
GMPS	Guanine Monophosphate Synthase	Protein Coding	P49915	55	GC03P155870	14.002	https://www.genecards.org/cgi-bin/carddisp.pl?gene=GMPS
MIR455	MicroRNA 455	RNA Gene		29	GC09P114209	13.9983	https://www.genecards.org/cgi-bin/carddisp.pl?gene=MIR455
BCYRN1	Brain Cytoplasmic RNA 1	RNA Gene		28	GC02P047253	13.9961	https://www.genecards.org/cgi-bin/carddisp.pl?gene=BCYRN1
ERVW-1	Endogenous Retrovirus Group W Member 1, Envelope	Protein Coding	Q9UQF0	47	GC07M092468	13.9686	https://www.genecards.org/cgi-bin/carddisp.pl?gene=ERVW-1
ISG20	Interferon Stimulated Exonuclease Gene 20	Protein Coding	Q96AZ6	51	GC15P088635	13.9523	https://www.genecards.org/cgi-bin/carddisp.pl?gene=ISG20
EIF4EBP1	Eukaryotic Translation Initiation Factor 4E Binding Protein 1	Protein Coding	Q13541	59	GC08P040500	13.8931	https://www.genecards.org/cgi-bin/carddisp.pl?gene=EIF4EBP1
MIR574	MicroRNA 574	RNA Gene		29	GC04P039149	13.8916	https://www.genecards.org/cgi-bin/carddisp.pl?gene=MIR574
LRRK1	Leucine Rich Repeat Kinase 1	Protein Coding	Q38SD2	51	GC15P100919	13.8454	https://www.genecards.org/cgi-bin/carddisp.pl?gene=LRRK1
SULT1E1	Sulfotransferase Family 1E Member 1	Protein Coding	P49888	54	GC04M069823	13.8114	https://www.genecards.org/cgi-bin/carddisp.pl?gene=SULT1E1
LAMP1	Lysosomal Associated Membrane Protein 1	Protein Coding	P11279	57	GC13P113297	13.7644	https://www.genecards.org/cgi-bin/carddisp.pl?gene=LAMP1
SLC22A2	Solute Carrier Family 22 Member 2	Protein Coding	O15244	56	GC06M160222	13.7215	https://www.genecards.org/cgi-bin/carddisp.pl?gene=SLC22A2
HDC	Histidine Decarboxylase	Protein Coding	P19113	57	GC15M050241	13.7174	https://www.genecards.org/cgi-bin/carddisp.pl?gene=HDC
CHRM3	Cholinergic Receptor Muscarinic 3	Protein Coding	P20309	62	GC01P239386	13.7073	https://www.genecards.org/cgi-bin/carddisp.pl?gene=CHRM3
PHB1	Prohibitin 1	Protein Coding	P35232	59	GC17M085589	13.6918	https://www.genecards.org/cgi-bin/carddisp.pl?gene=PHB1
RETREG1	Reticulophagy Regulator 1	Protein Coding	Q9H6L5	51	GC05M016591	13.6767	https://www.genecards.org/cgi-bin/carddisp.pl?gene=RETREG1
LGALS1	Galectin 1	Protein Coding	P09382	56	GC22P037675	13.6766	https://www.genecards.org/cgi-bin/carddisp.pl?gene=LGALS1
PIM1	Pim-1 Proto-Oncogene, Serine/Threonine Kinase	Protein Coding	P11309	62	GC06P144918	13.6557	https://www.genecards.org/cgi-bin/carddisp.pl?gene=PIM1
MIR181B1	MicroRNA 181b-1	RNA Gene		29	GC01M198858	13.6426	https://www.genecards.org/cgi-bin/carddisp.pl?gene=MIR181B1
PTPA	Protein Phosphatase 2 Phosphatase Activator	Protein Coding	Q15257	55	GC09P143892	13.6298	https://www.genecards.org/cgi-bin/carddisp.pl?gene=PTPA
STK24	Serine/Threonine Kinase 24	Protein Coding	Q9Y6E0	57	GC13M098445	13.6239	https://www.genecards.org/cgi-bin/carddisp.pl?gene=STK24
POLR1D	RNA Polymerase I And III Subunit D	Protein Coding	P0DPB6	55	GC13P027620	13.6123	https://www.genecards.org/cgi-bin/carddisp.pl?gene=POLR1D
CSGALNACT1	Chondroitin Sulfate N-Acetylgalactosaminyltransferase 1	Protein Coding	Q8TDX6	51	GC08M019404	13.5761	https://www.genecards.org/cgi-bin/carddisp.pl?gene=CSGALNACT1
GSTA2	Glutathione S-Transferase Alpha 2	Protein Coding	P09210	50	GC06M052750	13.5137	https://www.genecards.org/cgi-bin/carddisp.pl?gene=GSTA2
MAP2	Microtubule Associated Protein 2	Protein Coding	P11137	58	GC02P209424	13.5023	https://www.genecards.org/cgi-bin/carddisp.pl?gene=MAP2
C1QA	Complement C1q A Chain	Protein Coding	P02745	59	GC01P052016	13.4965	https://www.genecards.org/cgi-bin/carddisp.pl?gene=C1QA
PGD	Phosphogluconate Dehydrogenase	Protein Coding	P52209	60	GC01P010398	13.483	https://www.genecards.org/cgi-bin/carddisp.pl?gene=PGD
PRDX3	Peroxiredoxin 3	Protein Coding	P30048	56	GC10M119167	13.4519	https://www.genecards.org/cgi-bin/carddisp.pl?gene=PRDX3
POLB	DNA Polymerase Beta	Protein Coding	P06746	58	GC08P042338	13.4419	https://www.genecards.org/cgi-bin/carddisp.pl?gene=POLB
MS4A1	Membrane Spanning 4-Domains A1	Protein Coding	P11836	60	GC11P093390	13.4309	https://www.genecards.org/cgi-bin/carddisp.pl?gene=MS4A1
S100A4	S100 Calcium Binding Protein A4	Protein Coding	P26447	57	GC01M153543	13.4133	https://www.genecards.org/cgi-bin/carddisp.pl?gene=S100A4
DGKQ	Diacylglycerol Kinase Theta	Protein Coding	P52824	52	GC04M000958	13.4057	https://www.genecards.org/cgi-bin/carddisp.pl?gene=DGKQ
ADORA1	Adenosine A1 Receptor	Protein Coding	P30542	60	GC01P203090	13.3908	https://www.genecards.org/cgi-bin/carddisp.pl?gene=ADORA1
BNIP3	BCL2 Interacting Protein 3	Protein Coding	Q12983	52	GC10M131966	13.3475	https://www.genecards.org/cgi-bin/carddisp.pl?gene=BNIP3
SULT1A2	Sulfotransferase Family 1A Member 2	Protein Coding	P50226	51	GC16M028591	13.3048	https://www.genecards.org/cgi-bin/carddisp.pl?gene=SULT1A2
CLCN6	Chloride Voltage-Gated Channel 6	Protein Coding	P51797	54	GC01P011806	13.2833	https://www.genecards.org/cgi-bin/carddisp.pl?gene=CLCN6
UVRAG	UV Radiation Resistance Associated	Protein Coding	Q9P2Y5	54	GC11P075815	13.2501	https://www.genecards.org/cgi-bin/carddisp.pl?gene=UVRAG
C5AR1	Complement C5a Receptor 1	Protein Coding	P21730	58	GC19P047290	13.2378	https://www.genecards.org/cgi-bin/carddisp.pl?gene=C5AR1
ST3GAL4	ST3 Beta-Galactoside Alpha-2,3-Sialyltransferase 4	Protein Coding	Q11206	55	GC11P126355	13.219	https://www.genecards.org/cgi-bin/carddisp.pl?gene=ST3GAL4
MIR196A1	MicroRNA 196a-1	RNA Gene		31	GC17M048632	13.1998	https://www.genecards.org/cgi-bin/carddisp.pl?gene=MIR196A1
ARAF	A-Raf Proto-Oncogene, Serine/Threonine Kinase	Protein Coding	P10398	60	GC0XP058330	13.1809	https://www.genecards.org/cgi-bin/carddisp.pl?gene=ARAF
GALNT12	Polypeptide N-Acetylgalactosaminyltransferase 12	Protein Coding	Q8IXK2	51	GC09P098807	13.0867	https://www.genecards.org/cgi-bin/carddisp.pl?gene=GALNT12
SLC31A1	Solute Carrier Family 31 Member 1	Protein Coding	O15431	56	GC09P113221	13.0738	https://www.genecards.org/cgi-bin/carddisp.pl?gene=SLC31A1
MAPK9	Mitogen-Activated Protein Kinase 9	Protein Coding	P45984	60	GC05M180318	13.063	https://www.genecards.org/cgi-bin/carddisp.pl?gene=MAPK9
PDIA3	Protein Disulfide Isomerase Family A Member 3	Protein Coding	P30101	57	GC15P043746	13.0564	https://www.genecards.org/cgi-bin/carddisp.pl?gene=PDIA3
BDKRB2	Bradykinin Receptor B2	Protein Coding	P30411	57	GC14P096205	13.0466	https://www.genecards.org/cgi-bin/carddisp.pl?gene=BDKRB2
PTGDS	Prostaglandin D2 Synthase	Protein Coding	P41222	58	GC09P144367	13.0327	https://www.genecards.org/cgi-bin/carddisp.pl?gene=PTGDS
ACVR2A	Activin A Receptor Type 2A	Protein Coding	P27037	58	GC02P147844	13.0223	https://www.genecards.org/cgi-bin/carddisp.pl?gene=ACVR2A
PITX3	Paired Like Homeodomain 3	Protein Coding	O75364	51	GC10M102230	12.9861	https://www.genecards.org/cgi-bin/carddisp.pl?gene=PITX3
B3GAT1	Beta-1,3-Glucuronyltransferase 1	Protein Coding	Q9P2W7	56	GC11M134378	12.9514	https://www.genecards.org/cgi-bin/carddisp.pl?gene=B3GAT1
FEN1	Flap Structure-Specific Endonuclease 1	Protein Coding	P39748	59	GC11P093695	12.9393	https://www.genecards.org/cgi-bin/carddisp.pl?gene=FEN1
IL23A	Interleukin 23 Subunit Alpha	Protein Coding	Q9NPF7	51	GC12P062027	12.937	https://www.genecards.org/cgi-bin/carddisp.pl?gene=IL23A
GYPA	Glycophorin A (MNS Blood Group)	Protein Coding	P02724	57	GC04M144109	12.9359	https://www.genecards.org/cgi-bin/carddisp.pl?gene=GYPA
ACVR1B	Activin A Receptor Type 1B	Protein Coding	P36896	59	GC12P051951	12.9118	https://www.genecards.org/cgi-bin/carddisp.pl?gene=ACVR1B
NOX1	NADPH Oxidase 1	Protein Coding	Q9Y5S8	56	GC0XM100843	12.9054	https://www.genecards.org/cgi-bin/carddisp.pl?gene=NOX1
TEAD1	TEA Domain Transcription Factor 1	Protein Coding	P28347	59	GC11P012674	12.8331	https://www.genecards.org/cgi-bin/carddisp.pl?gene=TEAD1
NID1	Nidogen 1	Protein Coding	P14543	56	GC01M235975	12.8285	https://www.genecards.org/cgi-bin/carddisp.pl?gene=NID1
FUT3	Fucosyltransferase 3 (Lewis Blood Group)	Protein Coding	P21217	51	GC19M095974	12.8271	https://www.genecards.org/cgi-bin/carddisp.pl?gene=FUT3
AOC3	Amine Oxidase Copper Containing 3	Protein Coding	Q16853	58	GC17P042851	12.8215	https://www.genecards.org/cgi-bin/carddisp.pl?gene=AOC3
CACNA1I	Calcium Voltage-Gated Channel Subunit Alpha1 I	Protein Coding	Q9P0X4	57	GC22P039570	12.812	https://www.genecards.org/cgi-bin/carddisp.pl?gene=CACNA1I
ALAS1	5'-Aminolevulinate Synthase 1	Protein Coding	P13196	56	GC03P052198	12.8115	https://www.genecards.org/cgi-bin/carddisp.pl?gene=ALAS1
NPR3	Natriuretic Peptide Receptor 3	Protein Coding	P17342	57	GC05P032689	12.7708	https://www.genecards.org/cgi-bin/carddisp.pl?gene=NPR3
CDC25A	Cell Division Cycle 25A	Protein Coding	P30304	60	GC03M048321	12.7565	https://www.genecards.org/cgi-bin/carddisp.pl?gene=CDC25A
RPA2	Replication Protein A2	Protein Coding	P15927	56	GC01M031807	12.7483	https://www.genecards.org/cgi-bin/carddisp.pl?gene=RPA2
CSTA	Cystatin A	Protein Coding	P01040	56	GC03P122325	12.6957	https://www.genecards.org/cgi-bin/carddisp.pl?gene=CSTA
DELEC1	Deleted In Esophageal Cancer 1	RNA Gene	Q9P2X7	33	GC09P126513	12.6677	https://www.genecards.org/cgi-bin/carddisp.pl?gene=DELEC1
AQP7	Aquaporin 7	Protein Coding	O14520	54	GC09M033384	12.6583	https://www.genecards.org/cgi-bin/carddisp.pl?gene=AQP7
ME1	Malic Enzyme 1	Protein Coding	P48163	49	GC06M083210	12.6513	https://www.genecards.org/cgi-bin/carddisp.pl?gene=ME1
CSK	C-Terminal Src Kinase	Protein Coding	P41240	59	GC15P074782	12.6466	https://www.genecards.org/cgi-bin/carddisp.pl?gene=CSK
SERPINB2	Serpin Family B Member 2	Protein Coding	P05120	56	GC18P063871	12.6043	https://www.genecards.org/cgi-bin/carddisp.pl?gene=SERPINB2
GCNT2	Glucosaminyl (N-Acetyl) Transferase 2 (I Blood Group)	Protein Coding	Q8N0V5	55	GC06P010492	12.5569	https://www.genecards.org/cgi-bin/carddisp.pl?gene=GCNT2
VTRNA1-1	Vault RNA 1-1	RNA Gene		20	GC05P155316	12.4938	https://www.genecards.org/cgi-bin/carddisp.pl?gene=VTRNA1-1
SLCO2B1	Solute Carrier Organic Anion Transporter Family Member 2B1	Protein Coding	O94956	55	GC11P095319	12.4793	https://www.genecards.org/cgi-bin/carddisp.pl?gene=SLCO2B1
CDIPT	CDP-Diacylglycerol--Inositol 3-Phosphatidyltransferase	Protein Coding	O14735	54	GC16M044857	12.4754	https://www.genecards.org/cgi-bin/carddisp.pl?gene=CDIPT
PTPN3	Protein Tyrosine Phosphatase Non-Receptor Type 3	Protein Coding	P26045	55	GC09M109375	12.4597	https://www.genecards.org/cgi-bin/carddisp.pl?gene=PTPN3
ITGA5	Integrin Subunit Alpha 5	Protein Coding	P08648	60	GC12M056062	12.4321	https://www.genecards.org/cgi-bin/carddisp.pl?gene=ITGA5
CSN1S1	Casein Alpha S1	Protein Coding	P47710	49	GC04P070045	12.3656	https://www.genecards.org/cgi-bin/carddisp.pl?gene=CSN1S1
GRK1	G Protein-Coupled Receptor Kinase 1	Protein Coding	Q15835	55	GC13P113957	12.344	https://www.genecards.org/cgi-bin/carddisp.pl?gene=GRK1
KPNB1	Karyopherin Subunit Beta 1	Protein Coding	Q14974	56	GC17P047649	12.3167	https://www.genecards.org/cgi-bin/carddisp.pl?gene=KPNB1
DUSP1	Dual Specificity Phosphatase 1	Protein Coding	P28562	59	GC05M172768	12.3158	https://www.genecards.org/cgi-bin/carddisp.pl?gene=DUSP1
SLFN14	Schlafen Family Member 14	Protein Coding	P0C7P3	47	GC17M084888	12.3147	https://www.genecards.org/cgi-bin/carddisp.pl?gene=SLFN14
CTSG	Cathepsin G	Protein Coding	P08311	56	GC14M024573	12.2709	https://www.genecards.org/cgi-bin/carddisp.pl?gene=CTSG
PISD	Phosphatidylserine Decarboxylase	Protein Coding	Q9UG56	53	GC22M079215	12.2427	https://www.genecards.org/cgi-bin/carddisp.pl?gene=PISD
ST8SIA2	ST8 Alpha-N-Acetyl-Neuraminide Alpha-2,8-Sialyltransferase 2	Protein Coding	Q92186	54	GC15P092393	12.2397	https://www.genecards.org/cgi-bin/carddisp.pl?gene=ST8SIA2
DUT	Deoxyuridine Triphosphatase	Protein Coding	P33316	55	GC15P048331	12.2325	https://www.genecards.org/cgi-bin/carddisp.pl?gene=DUT
ATP2A3	ATPase Sarcoplasmic/Endoplasmic Reticulum Ca2+ Transporting 3	Protein Coding	Q93084	57	GC17M003923	12.2195	https://www.genecards.org/cgi-bin/carddisp.pl?gene=ATP2A3
IGHE	Immunoglobulin Heavy Constant Epsilon	Protein Coding	P01854	42	GC14M121124	12.174	https://www.genecards.org/cgi-bin/carddisp.pl?gene=IGHE
SLC8A1	Solute Carrier Family 8 Member A1	Protein Coding	P32418	57	GC02M040078	12.1392	https://www.genecards.org/cgi-bin/carddisp.pl?gene=SLC8A1
KHDRBS1	KH RNA Binding Domain Containing, Signal Transduction Associated 1	Protein Coding	Q07666	54	GC01P032013	12.1329	https://www.genecards.org/cgi-bin/carddisp.pl?gene=KHDRBS1
BTG2	BTG Anti-Proliferation Factor 2	Protein Coding	P78543	49	GC01P203305	12.1223	https://www.genecards.org/cgi-bin/carddisp.pl?gene=BTG2
CISH	Cytokine Inducible SH2 Containing Protein	Protein Coding	Q9NSE2	58	GC03M054110	12.1185	https://www.genecards.org/cgi-bin/carddisp.pl?gene=CISH
AMBP	Alpha-1-Microglobulin/Bikunin Precursor	Protein Coding	P02760	56	GC09M114060	12.1172	https://www.genecards.org/cgi-bin/carddisp.pl?gene=AMBP
INHA	Inhibin Subunit Alpha	Protein Coding	P05111	56	GC02P219569	12.1135	https://www.genecards.org/cgi-bin/carddisp.pl?gene=INHA
MAP3K5	Mitogen-Activated Protein Kinase Kinase Kinase 5	Protein Coding	Q99683	61	GC06M136557	12.0902	https://www.genecards.org/cgi-bin/carddisp.pl?gene=MAP3K5
SLC20A1	Solute Carrier Family 20 Member 1	Protein Coding	Q8WUM9	54	GC02P146134	12.0553	https://www.genecards.org/cgi-bin/carddisp.pl?gene=SLC20A1
MIR28	MicroRNA 28	RNA Gene		28	GC03P188688	12.0454	https://www.genecards.org/cgi-bin/carddisp.pl?gene=MIR28
HRH1	Histamine Receptor H1	Protein Coding	P35367	58	GC03P022814	12.0344	https://www.genecards.org/cgi-bin/carddisp.pl?gene=HRH1
KLK1	Kallikrein 1	Protein Coding	P06870	60	GC19M050819	11.9803	https://www.genecards.org/cgi-bin/carddisp.pl?gene=KLK1
BCAR1	BCAR1 Scaffold Protein, Cas Family Member	Protein Coding	P56945	56	GC16M075228	11.9674	https://www.genecards.org/cgi-bin/carddisp.pl?gene=BCAR1
C1QB	Complement C1q B Chain	Protein Coding	P02746	56	GC01P022652	11.954	https://www.genecards.org/cgi-bin/carddisp.pl?gene=C1QB
SCAF11	SR-Related CTD Associated Factor 11	Protein Coding	Q99590	44	GC12M045919	11.9424	https://www.genecards.org/cgi-bin/carddisp.pl?gene=SCAF11
CYP2D7	Cytochrome P450 Family 2 Subfamily D Member 7 (Gene/Pseudogene)	Protein Coding	A0A087X1C5	30	GC22M079367	11.9347	https://www.genecards.org/cgi-bin/carddisp.pl?gene=CYP2D7
MGAT1	Alpha-1,3-Mannosyl-Glycoprotein 2-Beta-N-Acetylglucosaminyltransferase	Protein Coding	P26572	54	GC05M182700	11.9104	https://www.genecards.org/cgi-bin/carddisp.pl?gene=MGAT1
HLA-DRB5	Major Histocompatibility Complex, Class II, DR Beta 5	Protein Coding	Q30154	51	GC06M097155	11.8853	https://www.genecards.org/cgi-bin/carddisp.pl?gene=HLA-DRB5
CASD1	CAS1 Domain Containing 1	Protein Coding	Q96PB1	47	GC07P094509	11.8712	https://www.genecards.org/cgi-bin/carddisp.pl?gene=CASD1
GNAI2	G Protein Subunit Alpha I2	Protein Coding	P04899	59	GC03P050226	11.8499	https://www.genecards.org/cgi-bin/carddisp.pl?gene=GNAI2
ALPG	Alkaline Phosphatase, Germ Cell	Protein Coding	P10696	54	GC02P233020	11.8383	https://www.genecards.org/cgi-bin/carddisp.pl?gene=ALPG
CXCL2	C-X-C Motif Chemokine Ligand 2	Protein Coding	P19875	52	GC04M074097	11.7846	https://www.genecards.org/cgi-bin/carddisp.pl?gene=CXCL2
MIR208B	MicroRNA 208b	RNA Gene		29	GC14M023417	11.7778	https://www.genecards.org/cgi-bin/carddisp.pl?gene=MIR208B
SELENOP	Selenoprotein P	Protein Coding	P49908	48	GC05M042800	11.7382	https://www.genecards.org/cgi-bin/carddisp.pl?gene=SELENOP
LALBA	Lactalbumin Alpha	Protein Coding	P00709	51	GC12M048567	11.7288	https://www.genecards.org/cgi-bin/carddisp.pl?gene=LALBA
ALDH3B1	Aldehyde Dehydrogenase 3 Family Member B1	Protein Coding	P43353	49	GC11P094839	11.7035	https://www.genecards.org/cgi-bin/carddisp.pl?gene=ALDH3B1
CNNM4	Cyclin And CBS Domain Divalent Metal Cation Transport Mediator 4	Protein Coding	Q6P4Q7	52	GC02P098024	11.6899	https://www.genecards.org/cgi-bin/carddisp.pl?gene=CNNM4
PPIA	Peptidylprolyl Isomerase A	Protein Coding	P62937	58	GC07P044827	11.6812	https://www.genecards.org/cgi-bin/carddisp.pl?gene=PPIA
TUBA1B	Tubulin Alpha 1b	Protein Coding	P68363	58	GC12M049127	11.6701	https://www.genecards.org/cgi-bin/carddisp.pl?gene=TUBA1B
BLVRB	Biliverdin Reductase B	Protein Coding	P30043	53	GC19M040447	11.6578	https://www.genecards.org/cgi-bin/carddisp.pl?gene=BLVRB
LOC109504728	Chromosome 9 Open Reading Frame 72 Repeat Instability Region	Functional Element		10	GC09P027658	11.6457	https://www.genecards.org/cgi-bin/carddisp.pl?gene=LOC109504728
GSTA4	Glutathione S-Transferase Alpha 4	Protein Coding	O15217	54	GC06M052977	11.6448	https://www.genecards.org/cgi-bin/carddisp.pl?gene=GSTA4
INTS3	Integrator Complex Subunit 3	Protein Coding	Q68E01	48	GC01P153728	11.6239	https://www.genecards.org/cgi-bin/carddisp.pl?gene=INTS3
FOXO4	Forkhead Box O4	Protein Coding	P98177	54	GC0XP071095	11.6098	https://www.genecards.org/cgi-bin/carddisp.pl?gene=FOXO4
TIAL1	TIA1 Cytotoxic Granule Associated RNA Binding Protein Like 1	Protein Coding	Q01085	51	GC10M119571	11.5879	https://www.genecards.org/cgi-bin/carddisp.pl?gene=TIAL1
GYG2	Glycogenin 2	Protein Coding	O15488	51	GC0XP002828	11.5876	https://www.genecards.org/cgi-bin/carddisp.pl?gene=GYG2
ADPRH	ADP-Ribosylarginine Hydrolase	Protein Coding	P54922	47	GC03P119579	11.5632	https://www.genecards.org/cgi-bin/carddisp.pl?gene=ADPRH
SELPLG	Selectin P Ligand	Protein Coding	Q14242	56	GC12M108621	11.5543	https://www.genecards.org/cgi-bin/carddisp.pl?gene=SELPLG
FAS-AS1	FAS Antisense RNA 1	RNA Gene		21	GC10M088991	11.5283	https://www.genecards.org/cgi-bin/carddisp.pl?gene=FAS-AS1
CBR1	Carbonyl Reductase 1	Protein Coding	P16152	54	GC21P036069	11.5266	https://www.genecards.org/cgi-bin/carddisp.pl?gene=CBR1
TTF2	Transcription Termination Factor 2	Protein Coding	Q9UNY4	53	GC01P117060	11.5091	https://www.genecards.org/cgi-bin/carddisp.pl?gene=TTF2
DNTT	DNA Nucleotidylexotransferase	Protein Coding	P04053	54	GC10P096304	11.5051	https://www.genecards.org/cgi-bin/carddisp.pl?gene=DNTT
CXADR	CXADR Ig-Like Cell Adhesion Molecule	Protein Coding	P78310	56	GC21P017513	11.5002	https://www.genecards.org/cgi-bin/carddisp.pl?gene=CXADR
AMHR2	Anti-Mullerian Hormone Receptor Type 2	Protein Coding	Q16671	58	GC12P053423	11.4763	https://www.genecards.org/cgi-bin/carddisp.pl?gene=AMHR2
INTS2	Integrator Complex Subunit 2	Protein Coding	Q9H0H0	44	GC17M061865	11.4739	https://www.genecards.org/cgi-bin/carddisp.pl?gene=INTS2
BLMH	Bleomycin Hydrolase	Protein Coding	Q13867	57	GC17M030248	11.4424	https://www.genecards.org/cgi-bin/carddisp.pl?gene=BLMH
HAO1	Hydroxyacid Oxidase 1	Protein Coding	Q9UJM8	54	GC20M009974	11.425	https://www.genecards.org/cgi-bin/carddisp.pl?gene=HAO1
SFN	Stratifin	Protein Coding	P31947	58	GC01P052767	11.3997	https://www.genecards.org/cgi-bin/carddisp.pl?gene=SFN
FUT4	Fucosyltransferase 4	Protein Coding	P22083	52	GC11P096335	11.3939	https://www.genecards.org/cgi-bin/carddisp.pl?gene=FUT4
C1QC	Complement C1q C Chain	Protein Coding	P02747	58	GC01P022643	11.3589	https://www.genecards.org/cgi-bin/carddisp.pl?gene=C1QC
MIR301A	MicroRNA 301a	RNA Gene		29	GC17M059151	11.3242	https://www.genecards.org/cgi-bin/carddisp.pl?gene=MIR301A
CFL1	Cofilin 1	Protein Coding	P23528	59	GC11M065823	11.3179	https://www.genecards.org/cgi-bin/carddisp.pl?gene=CFL1
PPP1R12A	Protein Phosphatase 1 Regulatory Subunit 12A	Protein Coding	O14974	58	GC12M079773	11.316	https://www.genecards.org/cgi-bin/carddisp.pl?gene=PPP1R12A
AS3MT	Arsenite Methyltransferase	Protein Coding	Q9HBK9	47	GC10P102869	11.2063	https://www.genecards.org/cgi-bin/carddisp.pl?gene=AS3MT
CNDP2	Carnosine Dipeptidase 2	Protein Coding	Q96KP4	53	GC18P074495	11.1545	https://www.genecards.org/cgi-bin/carddisp.pl?gene=CNDP2
ROCR	Regulator Of Chondrogenesis RNA	RNA Gene		22	GC17M087858	11.1504	https://www.genecards.org/cgi-bin/carddisp.pl?gene=ROCR
SNORD44	Small Nucleolar RNA, C/D Box 44	RNA Gene		21	GC01M174982	11.1373	https://www.genecards.org/cgi-bin/carddisp.pl?gene=SNORD44
CHRM1	Cholinergic Receptor Muscarinic 1	Protein Coding	P11229	57	GC11M128877	11.1283	https://www.genecards.org/cgi-bin/carddisp.pl?gene=CHRM1
PXN	Paxillin	Protein Coding	P49023	58	GC12M120210	11.1205	https://www.genecards.org/cgi-bin/carddisp.pl?gene=PXN
PWAR4	Prader Willi/Angelman Region RNA 4	RNA Gene		17	GC15P025211	11.1199	https://www.genecards.org/cgi-bin/carddisp.pl?gene=PWAR4
RNU6-1	RNA, U6 Small Nuclear 1	RNA Gene		24	GC15M067839	11.1188	https://www.genecards.org/cgi-bin/carddisp.pl?gene=RNU6-1
IVL	Involucrin	Protein Coding	P07476	52	GC01P167124	11.1097	https://www.genecards.org/cgi-bin/carddisp.pl?gene=IVL
MIR188	MicroRNA 188	RNA Gene		26	GC0XP050003	11.0854	https://www.genecards.org/cgi-bin/carddisp.pl?gene=MIR188
CCL20	C-C Motif Chemokine Ligand 20	Protein Coding	P78556	55	GC02P227846	11.0613	https://www.genecards.org/cgi-bin/carddisp.pl?gene=CCL20
APLNR	Apelin Receptor	Protein Coding	P35414	56	GC11M057233	11.0382	https://www.genecards.org/cgi-bin/carddisp.pl?gene=APLNR
EIF5A	Eukaryotic Translation Initiation Factor 5A	Protein Coding	P63241	55	GC17P007306	11.0103	https://www.genecards.org/cgi-bin/carddisp.pl?gene=EIF5A
AQP4	Aquaporin 4	Protein Coding	P55087	59	GC18M026852	10.9966	https://www.genecards.org/cgi-bin/carddisp.pl?gene=AQP4
PGAM1	Phosphoglycerate Mutase 1	Protein Coding	P18669	55	GC10P097426	10.9912	https://www.genecards.org/cgi-bin/carddisp.pl?gene=PGAM1
DTYMK	Deoxythymidylate Kinase	Protein Coding	P23919	55	GC02M241675	10.9836	https://www.genecards.org/cgi-bin/carddisp.pl?gene=DTYMK
SCG5	Secretogranin V	Protein Coding	P05408	51	GC15P032641	10.9798	https://www.genecards.org/cgi-bin/carddisp.pl?gene=SCG5
CX3CL1	C-X3-C Motif Chemokine Ligand 1	Protein Coding	P78423	56	GC16P057372	10.9606	https://www.genecards.org/cgi-bin/carddisp.pl?gene=CX3CL1
DCP2	Decapping MRNA 2	Protein Coding	Q8IU60	41	GC05P112976	10.9588	https://www.genecards.org/cgi-bin/carddisp.pl?gene=DCP2
POLL	DNA Polymerase Lambda	Protein Coding	Q9UGP5	55	GC10M101578	10.9394	https://www.genecards.org/cgi-bin/carddisp.pl?gene=POLL
SLC22A8	Solute Carrier Family 22 Member 8	Protein Coding	Q8TCC7	54	GC11M128882	10.9294	https://www.genecards.org/cgi-bin/carddisp.pl?gene=SLC22A8
THORLNC	Testis Associated Oncogenic LncRNA	RNA Gene		16	GC02M118133	10.9294	https://www.genecards.org/cgi-bin/carddisp.pl?gene=THORLNC
TRADD	TNFRSF1A Associated Via Death Domain	Protein Coding	Q15628	55	GC16M067154	10.9257	https://www.genecards.org/cgi-bin/carddisp.pl?gene=TRADD
SPN	Sialophorin	Protein Coding	P16150	54	GC16P029662	10.9179	https://www.genecards.org/cgi-bin/carddisp.pl?gene=SPN
XPNPEP1	X-Prolyl Aminopeptidase 1	Protein Coding	Q9NQW7	52	GC10M109864	10.8888	https://www.genecards.org/cgi-bin/carddisp.pl?gene=XPNPEP1
ACP3	Acid Phosphatase 3	Protein Coding	P15309	55	GC03P140065	10.8614	https://www.genecards.org/cgi-bin/carddisp.pl?gene=ACP3
TLK2	Tousled Like Kinase 2	Protein Coding	Q86UE8	58	GC17P062458	10.8294	https://www.genecards.org/cgi-bin/carddisp.pl?gene=TLK2
PPA1	Inorganic Pyrophosphatase 1	Protein Coding	Q15181	52	GC10M070202	10.8109	https://www.genecards.org/cgi-bin/carddisp.pl?gene=PPA1
ATP13A1	ATPase 13A1	Protein Coding	Q9HD20	49	GC19M019645	10.7793	https://www.genecards.org/cgi-bin/carddisp.pl?gene=ATP13A1
ERVK-6	Endogenous Retrovirus Group K Member 6, Envelope	Protein Coding	Q69384	23	GC07U903184	10.7595	https://www.genecards.org/cgi-bin/carddisp.pl?gene=ERVK-6
CCL7	C-C Motif Chemokine Ligand 7	Protein Coding	P80098	55	GC17P034270	10.7576	https://www.genecards.org/cgi-bin/carddisp.pl?gene=CCL7
CCL18	C-C Motif Chemokine Ligand 18	Protein Coding	P55774	48	GC17P036064	10.7174	https://www.genecards.org/cgi-bin/carddisp.pl?gene=CCL18
GLRX	Glutaredoxin	Protein Coding	P35754	55	GC05M095752	10.6942	https://www.genecards.org/cgi-bin/carddisp.pl?gene=GLRX
UGT2B4	UDP Glucuronosyltransferase Family 2 Member B4	Protein Coding	P06133	52	GC04M069484	10.6846	https://www.genecards.org/cgi-bin/carddisp.pl?gene=UGT2B4
TRIM22	Tripartite Motif Containing 22	Protein Coding	Q8IYM9	49	GC11P005689	10.6353	https://www.genecards.org/cgi-bin/carddisp.pl?gene=TRIM22
FABP12	Fatty Acid Binding Protein 12	Protein Coding	A6NFH5	43	GC08M081524	10.6298	https://www.genecards.org/cgi-bin/carddisp.pl?gene=FABP12
HCK	HCK Proto-Oncogene, Src Family Tyrosine Kinase	Protein Coding	P08631	62	GC20P032052	10.6131	https://www.genecards.org/cgi-bin/carddisp.pl?gene=HCK
BLOC1S1	Biogenesis Of Lysosomal Organelles Complex 1 Subunit 1	Protein Coding	P78537	47	GC12P061976	10.6071	https://www.genecards.org/cgi-bin/carddisp.pl?gene=BLOC1S1
PIK3R4	Phosphoinositide-3-Kinase Regulatory Subunit 4	Protein Coding	Q99570	58	GC03M130678	10.5937	https://www.genecards.org/cgi-bin/carddisp.pl?gene=PIK3R4
THG1L	TRNA-Histidine Guanylyltransferase 1 Like	Protein Coding	Q9NWX6	53	GC05P157731	10.5892	https://www.genecards.org/cgi-bin/carddisp.pl?gene=THG1L
SIK2	Salt Inducible Kinase 2	Protein Coding	Q9H0K1	56	GC11P112590	10.5684	https://www.genecards.org/cgi-bin/carddisp.pl?gene=SIK2
SLC16A3	Solute Carrier Family 16 Member 3	Protein Coding	O15427	58	GC17P082217	10.565	https://www.genecards.org/cgi-bin/carddisp.pl?gene=SLC16A3
TOLLIP	Toll Interacting Protein	Protein Coding	Q9H0E2	56	GC11M001274	10.5647	https://www.genecards.org/cgi-bin/carddisp.pl?gene=TOLLIP
IFNA13	Interferon Alpha 13	Protein Coding	P01562	44	GC09M021367	10.5526	https://www.genecards.org/cgi-bin/carddisp.pl?gene=IFNA13
PPP2CB	Protein Phosphatase 2 Catalytic Subunit Beta	Protein Coding	P62714	51	GC08M030906	10.5394	https://www.genecards.org/cgi-bin/carddisp.pl?gene=PPP2CB
TAGLN	Transgelin	Protein Coding	Q01995	56	GC11P117199	10.5237	https://www.genecards.org/cgi-bin/carddisp.pl?gene=TAGLN
NFKBIB	NFKB Inhibitor Beta	Protein Coding	Q15653	54	GC19P038899	10.5212	https://www.genecards.org/cgi-bin/carddisp.pl?gene=NFKBIB
EXOC2	Exocyst Complex Component 2	Protein Coding	Q96KP1	54	GC06M000485	10.515	https://www.genecards.org/cgi-bin/carddisp.pl?gene=EXOC2
SNCG	Synuclein Gamma	Protein Coding	O76070	55	GC10P112552	10.4926	https://www.genecards.org/cgi-bin/carddisp.pl?gene=SNCG
ADAM12	ADAM Metallopeptidase Domain 12	Protein Coding	O43184	58	GC10M126012	10.4622	https://www.genecards.org/cgi-bin/carddisp.pl?gene=ADAM12
INTS8	Integrator Complex Subunit 8	Protein Coding	Q75QN2	51	GC08P094813	10.4435	https://www.genecards.org/cgi-bin/carddisp.pl?gene=INTS8
B3GNT2	UDP-GlcNAc:BetaGal Beta-1,3-N-Acetylglucosaminyltransferase 2	Protein Coding	Q9NY97	51	GC02P062196	10.4388	https://www.genecards.org/cgi-bin/carddisp.pl?gene=B3GNT2
MSMB	Microseminoprotein Beta	Protein Coding	P08118	52	GC10M046033	10.4362	https://www.genecards.org/cgi-bin/carddisp.pl?gene=MSMB
B4GALT6	Beta-1,4-Galactosyltransferase 6	Protein Coding	Q9UBX8	49	GC18M031622	10.4323	https://www.genecards.org/cgi-bin/carddisp.pl?gene=B4GALT6
TRPM2	Transient Receptor Potential Cation Channel Subfamily M Member 2	Protein Coding	O94759	51	GC21P044350	10.4005	https://www.genecards.org/cgi-bin/carddisp.pl?gene=TRPM2
APCS	Amyloid P Component, Serum	Protein Coding	P02743	55	GC01P159587	10.3727	https://www.genecards.org/cgi-bin/carddisp.pl?gene=APCS
TMSB4X	Thymosin Beta 4 X-Linked	Protein Coding	P62328	54	GC0XP012975	10.3455	https://www.genecards.org/cgi-bin/carddisp.pl?gene=TMSB4X
CUL2	Cullin 2	Protein Coding	Q13617	56	GC10M036134	10.3405	https://www.genecards.org/cgi-bin/carddisp.pl?gene=CUL2
M6PR	Mannose-6-Phosphate Receptor, Cation Dependent	Protein Coding	P20645	54	GC12M030799	10.3324	https://www.genecards.org/cgi-bin/carddisp.pl?gene=M6PR
TFAP2C	Transcription Factor AP-2 Gamma	Protein Coding	Q92754	54	GC20P056629	10.3138	https://www.genecards.org/cgi-bin/carddisp.pl?gene=TFAP2C
P2RX2	Purinergic Receptor P2X 2	Protein Coding	Q9UBL9	56	GC12P132618	10.3061	https://www.genecards.org/cgi-bin/carddisp.pl?gene=P2RX2
CALB2	Calbindin 2	Protein Coding	P22676	52	GC16P071358	10.2944	https://www.genecards.org/cgi-bin/carddisp.pl?gene=CALB2
INTS11	Integrator Complex Subunit 11	Protein Coding	Q5TA45	50	GC01M015013	10.2897	https://www.genecards.org/cgi-bin/carddisp.pl?gene=INTS11
PIK3C2B	Phosphatidylinositol-4-Phosphate 3-Kinase Catalytic Subunit Type 2 Beta	Protein Coding	O00750	56	GC01M204422	10.2407	https://www.genecards.org/cgi-bin/carddisp.pl?gene=PIK3C2B
PIAS4	Protein Inhibitor Of Activated STAT 4	Protein Coding	Q8N2W9	51	GC19P004007	10.2208	https://www.genecards.org/cgi-bin/carddisp.pl?gene=PIAS4
TRPC5	Transient Receptor Potential Cation Channel Subfamily C Member 5	Protein Coding	Q9UL62	54	GC0XM111774	10.2074	https://www.genecards.org/cgi-bin/carddisp.pl?gene=TRPC5
OPCML	Opioid Binding Protein/Cell Adhesion Molecule Like	Protein Coding	Q14982	54	GC11M132414	10.2057	https://www.genecards.org/cgi-bin/carddisp.pl?gene=OPCML
POLI	DNA Polymerase Iota	Protein Coding	Q9UNA4	54	GC18P054274	10.2057	https://www.genecards.org/cgi-bin/carddisp.pl?gene=POLI
MPP1	MAGUK P55 Scaffold Protein 1	Protein Coding	Q00013	51	GC0XM154779	10.1749	https://www.genecards.org/cgi-bin/carddisp.pl?gene=MPP1
TRPC4	Transient Receptor Potential Cation Channel Subfamily C Member 4	Protein Coding	Q9UBN4	56	GC13M040627	10.1481	https://www.genecards.org/cgi-bin/carddisp.pl?gene=TRPC4
SLC25A17	Solute Carrier Family 25 Member 17	Protein Coding	O43808	48	GC22M079357	10.1444	https://www.genecards.org/cgi-bin/carddisp.pl?gene=SLC25A17
HSPE1	Heat Shock Protein Family E (Hsp10) Member 1	Protein Coding	P61604	54	GC02P197501	10.1277	https://www.genecards.org/cgi-bin/carddisp.pl?gene=HSPE1
IFNA10	Interferon Alpha 10	Protein Coding	P01566	47	GC09M022179	10.0826	https://www.genecards.org/cgi-bin/carddisp.pl?gene=IFNA10
CD69	CD69 Molecule	Protein Coding	Q07108	55	GC12M030826	10.0703	https://www.genecards.org/cgi-bin/carddisp.pl?gene=CD69
HEPH	Hephaestin	Protein Coding	Q9BQS7	52	GC0XP066162	10.0576	https://www.genecards.org/cgi-bin/carddisp.pl?gene=HEPH
LAP3	Leucine Aminopeptidase 3	Protein Coding	P28838	55	GC04P025779	10.0255	https://www.genecards.org/cgi-bin/carddisp.pl?gene=LAP3
PPP5C	Protein Phosphatase 5 Catalytic Subunit	Protein Coding	P53041	56	GC19P123281	9.98143	https://www.genecards.org/cgi-bin/carddisp.pl?gene=PPP5C
PENK	Proenkephalin	Protein Coding	P01210	51	GC08M056436	9.96884	https://www.genecards.org/cgi-bin/carddisp.pl?gene=PENK
TAB1	TGF-Beta Activated Kinase 1 (MAP3K7) Binding Protein 1	Protein Coding	Q15750	55	GC22P076072	9.9667	https://www.genecards.org/cgi-bin/carddisp.pl?gene=TAB1
RPS6KA5	Ribosomal Protein S6 Kinase A5	Protein Coding	O75582	59	GC14M090847	9.92986	https://www.genecards.org/cgi-bin/carddisp.pl?gene=RPS6KA5
XPNPEP2	X-Prolyl Aminopeptidase 2	Protein Coding	O43895	54	GC0XP129738	9.89068	https://www.genecards.org/cgi-bin/carddisp.pl?gene=XPNPEP2
TNFRSF25	TNF Receptor Superfamily Member 25	Protein Coding	Q93038	55	GC01M006460	9.874	https://www.genecards.org/cgi-bin/carddisp.pl?gene=TNFRSF25
CIB1	Calcium And Integrin Binding 1	Protein Coding	Q99828	55	GC15M090229	9.86547	https://www.genecards.org/cgi-bin/carddisp.pl?gene=CIB1
PTPN12	Protein Tyrosine Phosphatase Non-Receptor Type 12	Protein Coding	Q05209	60	GC07P077537	9.79001	https://www.genecards.org/cgi-bin/carddisp.pl?gene=PTPN12
ACSM3	Acyl-CoA Synthetase Medium Chain Family Member 3	Protein Coding	Q53FZ2	47	GC16P020610	9.7808	https://www.genecards.org/cgi-bin/carddisp.pl?gene=ACSM3
HSPB2	Heat Shock Protein Family B (Small) Member 2	Protein Coding	Q16082	52	GC11P112605	9.76612	https://www.genecards.org/cgi-bin/carddisp.pl?gene=HSPB2
SLC22A6	Solute Carrier Family 22 Member 6	Protein Coding	Q4U2R8	56	GC11M128879	9.76479	https://www.genecards.org/cgi-bin/carddisp.pl?gene=SLC22A6
COX11	Cytochrome C Oxidase Copper Chaperone COX11	Protein Coding	Q9Y6N1	48	GC17M054951	9.74684	https://www.genecards.org/cgi-bin/carddisp.pl?gene=COX11
CPQ	Carboxypeptidase Q	Protein Coding	Q9Y646	51	GC08P096645	9.73623	https://www.genecards.org/cgi-bin/carddisp.pl?gene=CPQ
EXTL2	Exostosin Like Glycosyltransferase 2	Protein Coding	Q9UBQ6	50	GC01M100872	9.72395	https://www.genecards.org/cgi-bin/carddisp.pl?gene=EXTL2
SAA4	Serum Amyloid A4, Constitutive	Protein Coding	P35542	50	GC11M018234	9.63942	https://www.genecards.org/cgi-bin/carddisp.pl?gene=SAA4
PEBP1	Phosphatidylethanolamine Binding Protein 1	Protein Coding	P30086	58	GC12P118158	9.63251	https://www.genecards.org/cgi-bin/carddisp.pl?gene=PEBP1
STK19	Serine/Threonine Kinase 19	Protein Coding	P49842	48	GC06P031971	9.6158	https://www.genecards.org/cgi-bin/carddisp.pl?gene=STK19
CEPT1	Choline/Ethanolamine Phosphotransferase 1	Protein Coding	Q9Y6K0	51	GC01P111139	9.5996	https://www.genecards.org/cgi-bin/carddisp.pl?gene=CEPT1
MCU	Mitochondrial Calcium Uniporter	Protein Coding	Q8NE86	52	GC10P072692	9.58985	https://www.genecards.org/cgi-bin/carddisp.pl?gene=MCU
PPP6C	Protein Phosphatase 6 Catalytic Subunit	Protein Coding	O00743	52	GC09M125207	9.55632	https://www.genecards.org/cgi-bin/carddisp.pl?gene=PPP6C
CGAS	Cyclic GMP-AMP Synthase	Protein Coding	Q8N884	48	GC06M097672	9.55408	https://www.genecards.org/cgi-bin/carddisp.pl?gene=CGAS
ACSM2A	Acyl-CoA Synthetase Medium Chain Family Member 2A	Protein Coding	Q08AH3	42	GC16P096273	9.5501	https://www.genecards.org/cgi-bin/carddisp.pl?gene=ACSM2A
CHPT1	Choline Phosphotransferase 1	Protein Coding	Q8WUD6	46	GC12P101696	9.51945	https://www.genecards.org/cgi-bin/carddisp.pl?gene=CHPT1
AGMAT	Agmatinase (Putative)	Protein Coding	Q9BSE5	47	GC01M015571	9.51509	https://www.genecards.org/cgi-bin/carddisp.pl?gene=AGMAT
CCL8	C-C Motif Chemokine Ligand 8	Protein Coding	P80075	51	GC17P034319	9.50703	https://www.genecards.org/cgi-bin/carddisp.pl?gene=CCL8
ITGA9	Integrin Subunit Alpha 9	Protein Coding	Q13797	56	GC03P037468	9.47409	https://www.genecards.org/cgi-bin/carddisp.pl?gene=ITGA9
POLK	DNA Polymerase Kappa	Protein Coding	Q9UBT6	55	GC05P078907	9.43333	https://www.genecards.org/cgi-bin/carddisp.pl?gene=POLK
H1-2	H1.2 Linker Histone, Cluster Member	Protein Coding	P16403	53	GC06M096575	9.39047	https://www.genecards.org/cgi-bin/carddisp.pl?gene=H1-2
GPR68	G Protein-Coupled Receptor 68	Protein Coding	Q15743	54	GC14M091232	9.34799	https://www.genecards.org/cgi-bin/carddisp.pl?gene=GPR68
CYSLTR2	Cysteinyl Leukotriene Receptor 2	Protein Coding	Q9NS75	58	GC13P048653	9.32211	https://www.genecards.org/cgi-bin/carddisp.pl?gene=CYSLTR2
MPG	N-Methylpurine DNA Glycosylase	Protein Coding	P29372	52	GC16P095725	9.30947	https://www.genecards.org/cgi-bin/carddisp.pl?gene=MPG
SYN3	Synapsin III	Protein Coding	O14994	52	GC22M079243	9.30556	https://www.genecards.org/cgi-bin/carddisp.pl?gene=SYN3
TRA	T Cell Receptor Alpha Locus	Protein Coding	P0DSE1	31	GC14P021621	9.30376	https://www.genecards.org/cgi-bin/carddisp.pl?gene=TRA
DBN1	Drebrin 1	Protein Coding	Q16643	52	GC05M177456	9.30188	https://www.genecards.org/cgi-bin/carddisp.pl?gene=DBN1
INTS4	Integrator Complex Subunit 4	Protein Coding	Q96HW7	44	GC11M129429	9.23542	https://www.genecards.org/cgi-bin/carddisp.pl?gene=INTS4
NUDT12	Nudix Hydrolase 12	Protein Coding	Q9BQG2	46	GC05M103548	9.22801	https://www.genecards.org/cgi-bin/carddisp.pl?gene=NUDT12
SNCAIP	Synuclein Alpha Interacting Protein	Protein Coding	Q9Y6H5	55	GC05P122311	9.20358	https://www.genecards.org/cgi-bin/carddisp.pl?gene=SNCAIP
EDN2	Endothelin 2	Protein Coding	P20800	52	GC01M041478	9.15087	https://www.genecards.org/cgi-bin/carddisp.pl?gene=EDN2
ANXA4	Annexin A4	Protein Coding	P09525	51	GC02P069654	9.14101	https://www.genecards.org/cgi-bin/carddisp.pl?gene=ANXA4
P2RX1	Purinergic Receptor P2X 1	Protein Coding	P51575	56	GC17M003896	9.12751	https://www.genecards.org/cgi-bin/carddisp.pl?gene=P2RX1
IFNA14	Interferon Alpha 14	Protein Coding	P01570	47	GC09M021239	9.09644	https://www.genecards.org/cgi-bin/carddisp.pl?gene=IFNA14
IFNA21	Interferon Alpha 21	Protein Coding	P01568	47	GC09M021165	9.09494	https://www.genecards.org/cgi-bin/carddisp.pl?gene=IFNA21
MIR659	MicroRNA 659	RNA Gene		27	GC22M080154	9.0802	https://www.genecards.org/cgi-bin/carddisp.pl?gene=MIR659
NPR1	Natriuretic Peptide Receptor 1	Protein Coding	P16066	58	GC01P167159	9.07164	https://www.genecards.org/cgi-bin/carddisp.pl?gene=NPR1
SULT1B1	Sulfotransferase Family 1B Member 1	Protein Coding	O43704	50	GC04M069721	9.06699	https://www.genecards.org/cgi-bin/carddisp.pl?gene=SULT1B1
P2RY1	Purinergic Receptor P2Y1	Protein Coding	P47900	59	GC03P152835	9.05609	https://www.genecards.org/cgi-bin/carddisp.pl?gene=P2RY1
INTS6	Integrator Complex Subunit 6	Protein Coding	Q9UL03	43	GC13M051334	9.05606	https://www.genecards.org/cgi-bin/carddisp.pl?gene=INTS6
GALNT17	Polypeptide N-Acetylgalactosaminyltransferase 17	Protein Coding	Q6IS24	51	GC07P088315	9.0522	https://www.genecards.org/cgi-bin/carddisp.pl?gene=GALNT17
CSN2	Casein Beta	Protein Coding	P05814	47	GC04M069955	9.03981	https://www.genecards.org/cgi-bin/carddisp.pl?gene=CSN2
POLQ	DNA Polymerase Theta	Protein Coding	O75417	51	GC03M121431	9.03372	https://www.genecards.org/cgi-bin/carddisp.pl?gene=POLQ
RPLP2	Ribosomal Protein Lateral Stalk Subunit P2	Protein Coding	P05387	50	GC11P012276	8.98726	https://www.genecards.org/cgi-bin/carddisp.pl?gene=RPLP2
IFNA17	Interferon Alpha 17	Protein Coding	P01571	43	GC09M021227	8.98692	https://www.genecards.org/cgi-bin/carddisp.pl?gene=IFNA17
SERPINB3	Serpin Family B Member 3	Protein Coding	P29508	52	GC18M063655	8.97213	https://www.genecards.org/cgi-bin/carddisp.pl?gene=SERPINB3
BAIAP2L1	BAR/IMD Domain Containing Adaptor Protein 2 Like 1	Protein Coding	Q9UHR4	50	GC07M098294	8.94435	https://www.genecards.org/cgi-bin/carddisp.pl?gene=BAIAP2L1
GRK5	G Protein-Coupled Receptor Kinase 5	Protein Coding	P34947	55	GC10P119207	8.91967	https://www.genecards.org/cgi-bin/carddisp.pl?gene=GRK5
ST7-OT3	ST7 Overlapping Transcript 3	RNA Gene		20	GC07P117217	8.90781	https://www.genecards.org/cgi-bin/carddisp.pl?gene=ST7-OT3
DUSP19	Dual Specificity Phosphatase 19	Protein Coding	Q8WTR2	49	GC02P183078	8.83787	https://www.genecards.org/cgi-bin/carddisp.pl?gene=DUSP19
DNER	Delta/Notch Like EGF Repeat Containing	Protein Coding	Q8NFT8	51	GC02M229357	8.82524	https://www.genecards.org/cgi-bin/carddisp.pl?gene=DNER
LINC01139	Long Intergenic Non-Protein Coding RNA 1139	RNA Gene		22	GC01M238480	8.80645	https://www.genecards.org/cgi-bin/carddisp.pl?gene=LINC01139
SRR	Serine Racemase	Protein Coding	Q9GZT4	51	GC17P002303	8.79768	https://www.genecards.org/cgi-bin/carddisp.pl?gene=SRR
MMP10	Matrix Metallopeptidase 10	Protein Coding	P09238	56	GC11M102770	8.79175	https://www.genecards.org/cgi-bin/carddisp.pl?gene=MMP10
IFNA8	Interferon Alpha 8	Protein Coding	P32881	47	GC09P021409	8.75838	https://www.genecards.org/cgi-bin/carddisp.pl?gene=IFNA8
METAP2	Methionyl Aminopeptidase 2	Protein Coding	P50579	54	GC12P095473	8.75706	https://www.genecards.org/cgi-bin/carddisp.pl?gene=METAP2
PPM1L	Protein Phosphatase, Mg2+/Mn2+ Dependent 1L	Protein Coding	Q5SGD2	49	GC03P160755	8.75695	https://www.genecards.org/cgi-bin/carddisp.pl?gene=PPM1L
BCO2	Beta-Carotene Oxygenase 2	Protein Coding	Q9BYV7	47	GC11P112175	8.74948	https://www.genecards.org/cgi-bin/carddisp.pl?gene=BCO2
PPM1A	Protein Phosphatase, Mg2+/Mn2+ Dependent 1A	Protein Coding	P35813	55	GC14P060245	8.7378	https://www.genecards.org/cgi-bin/carddisp.pl?gene=PPM1A
B4GALT5	Beta-1,4-Galactosyltransferase 5	Protein Coding	O43286	48	GC20M049632	8.72986	https://www.genecards.org/cgi-bin/carddisp.pl?gene=B4GALT5
PEX5L	Peroxisomal Biogenesis Factor 5 Like	Protein Coding	Q8IYB4	47	GC03M179794	8.72835	https://www.genecards.org/cgi-bin/carddisp.pl?gene=PEX5L
IFNA6	Interferon Alpha 6	Protein Coding	P05013	48	GC09M022182	8.69693	https://www.genecards.org/cgi-bin/carddisp.pl?gene=IFNA6
MAPK12	Mitogen-Activated Protein Kinase 12	Protein Coding	P53778	59	GC22M079483	8.68148	https://www.genecards.org/cgi-bin/carddisp.pl?gene=MAPK12
HRG	Histidine Rich Glycoprotein	Protein Coding	P04196	56	GC03P186660	8.67759	https://www.genecards.org/cgi-bin/carddisp.pl?gene=HRG
IFNA5	Interferon Alpha 5	Protein Coding	P01569	51	GC09M021304	8.67038	https://www.genecards.org/cgi-bin/carddisp.pl?gene=IFNA5
VASP	Vasodilator Stimulated Phosphoprotein	Protein Coding	P50552	56	GC19P123259	8.66629	https://www.genecards.org/cgi-bin/carddisp.pl?gene=VASP
CALU	Calumenin	Protein Coding	O43852	52	GC07P128739	8.65015	https://www.genecards.org/cgi-bin/carddisp.pl?gene=CALU
INTS5	Integrator Complex Subunit 5	Protein Coding	Q6P9B9	44	GC11M128853	8.64815	https://www.genecards.org/cgi-bin/carddisp.pl?gene=INTS5
AHSP	Alpha Hemoglobin Stabilizing Protein	Protein Coding	Q9NZD4	48	GC16P031527	8.63123	https://www.genecards.org/cgi-bin/carddisp.pl?gene=AHSP
STMN2	Stathmin 2	Protein Coding	Q93045	52	GC08P079610	8.6164	https://www.genecards.org/cgi-bin/carddisp.pl?gene=STMN2
IDH3G	Isocitrate Dehydrogenase (NAD(+)) 3 Non-Catalytic Subunit Gamma	Protein Coding	P51553	51	GC0XM153785	8.58686	https://www.genecards.org/cgi-bin/carddisp.pl?gene=IDH3G
SEC23IP	SEC23 Interacting Protein	Protein Coding	Q9Y6Y8	50	GC10P119892	8.56861	https://www.genecards.org/cgi-bin/carddisp.pl?gene=SEC23IP
IFNA4	Interferon Alpha 4	Protein Coding	P05014	46	GC09M021186	8.56459	https://www.genecards.org/cgi-bin/carddisp.pl?gene=IFNA4
PDE8A	Phosphodiesterase 8A	Protein Coding	O60658	48	GC15P167146	8.53028	https://www.genecards.org/cgi-bin/carddisp.pl?gene=PDE8A
GALNT1	Polypeptide N-Acetylgalactosaminyltransferase 1	Protein Coding	Q10472	45	GC18P035581	8.5116	https://www.genecards.org/cgi-bin/carddisp.pl?gene=GALNT1
GIPR	Gastric Inhibitory Polypeptide Receptor	Protein Coding	P48546	55	GC19P045668	8.47558	https://www.genecards.org/cgi-bin/carddisp.pl?gene=GIPR
CROT	Carnitine O-Octanoyltransferase	Protein Coding	Q9UKG9	50	GC07P088755	8.46286	https://www.genecards.org/cgi-bin/carddisp.pl?gene=CROT
RCVRN	Recoverin	Protein Coding	P35243	52	GC17M009896	8.45269	https://www.genecards.org/cgi-bin/carddisp.pl?gene=RCVRN
PICK1	Protein Interacting With PRKCA 1	Protein Coding	Q9NRD5	54	GC22P038056	8.44536	https://www.genecards.org/cgi-bin/carddisp.pl?gene=PICK1
NUDT16	Nudix Hydrolase 16	Protein Coding	Q96DE0	40	GC03P131381	8.42799	https://www.genecards.org/cgi-bin/carddisp.pl?gene=NUDT16
TRV-CAC1-2	TRNA-Val (Anticodon CAC) 1-2	RNA Gene		8	GC05P181097	8.40942	https://www.genecards.org/cgi-bin/carddisp.pl?gene=TRV-CAC1-2
MAP3K11	Mitogen-Activated Protein Kinase Kinase Kinase 11	Protein Coding	Q16584	58	GC11M129016	8.40634	https://www.genecards.org/cgi-bin/carddisp.pl?gene=MAP3K11
DDO	D-Aspartate Oxidase	Protein Coding	Q99489	48	GC06M110391	8.40423	https://www.genecards.org/cgi-bin/carddisp.pl?gene=DDO
IFNA7	Interferon Alpha 7	Protein Coding	P01567	44	GC09M022178	8.40259	https://www.genecards.org/cgi-bin/carddisp.pl?gene=IFNA7
APEH	Acylaminoacyl-Peptide Hydrolase	Protein Coding	P13798	51	GC03P049673	8.3797	https://www.genecards.org/cgi-bin/carddisp.pl?gene=APEH
ADORA3	Adenosine A3 Receptor	Protein Coding	P0DMS8	56	GC01M111499	8.37842	https://www.genecards.org/cgi-bin/carddisp.pl?gene=ADORA3
LRIG1	Leucine Rich Repeats And Immunoglobulin Like Domains 1	Protein Coding	Q96JA1	53	GC03M066379	8.36629	https://www.genecards.org/cgi-bin/carddisp.pl?gene=LRIG1
SLC5A8	Solute Carrier Family 5 Member 8	Protein Coding	Q8N695	53	GC12M101155	8.32189	https://www.genecards.org/cgi-bin/carddisp.pl?gene=SLC5A8
IDI1	Isopentenyl-Diphosphate Delta Isomerase 1	Protein Coding	Q13907	52	GC10M001039	8.32121	https://www.genecards.org/cgi-bin/carddisp.pl?gene=IDI1
MGAT5	Alpha-1,6-Mannosylglycoprotein 6-Beta-N-Acetylglucosaminyltransferase	Protein Coding	Q09328	50	GC02P134119	8.30957	https://www.genecards.org/cgi-bin/carddisp.pl?gene=MGAT5
SLC38A3	Solute Carrier Family 38 Member 3	Protein Coding	Q99624	48	GC03P050205	8.30747	https://www.genecards.org/cgi-bin/carddisp.pl?gene=SLC38A3
IFNA16	Interferon Alpha 16	Protein Coding	P05015	43	GC09M021216	8.27578	https://www.genecards.org/cgi-bin/carddisp.pl?gene=IFNA16
AMY2B	Amylase Alpha 2B	Protein Coding	P19961	51	GC01P103554	8.20831	https://www.genecards.org/cgi-bin/carddisp.pl?gene=AMY2B
SELENOS	Selenoprotein S	Protein Coding	Q9BQE4	47	GC15M152459	8.19553	https://www.genecards.org/cgi-bin/carddisp.pl?gene=SELENOS
PRDX4	Peroxiredoxin 4	Protein Coding	Q13162	51	GC0XP023665	8.18947	https://www.genecards.org/cgi-bin/carddisp.pl?gene=PRDX4
CCL21	C-C Motif Chemokine Ligand 21	Protein Coding	O00585	54	GC09M034709	8.18167	https://www.genecards.org/cgi-bin/carddisp.pl?gene=CCL21
STK25	Serine/Threonine Kinase 25	Protein Coding	O00506	51	GC02M241492	8.11513	https://www.genecards.org/cgi-bin/carddisp.pl?gene=STK25
B3GALT2	Beta-1,3-Galactosyltransferase 2	Protein Coding	O43825	43	GC01M193147	8.10688	https://www.genecards.org/cgi-bin/carddisp.pl?gene=B3GALT2
TRPC1	Transient Receptor Potential Cation Channel Subfamily C Member 1	Protein Coding	P48995	54	GC03P142724	8.08056	https://www.genecards.org/cgi-bin/carddisp.pl?gene=TRPC1
PPP1R1B	Protein Phosphatase 1 Regulatory Inhibitor Subunit 1B	Protein Coding	Q9UD71	56	GC17P039626	8.06335	https://www.genecards.org/cgi-bin/carddisp.pl?gene=PPP1R1B
SLC6A11	Solute Carrier Family 6 Member 11	Protein Coding	P48066	52	GC03P022812	8.06255	https://www.genecards.org/cgi-bin/carddisp.pl?gene=SLC6A11
NUDT3	Nudix Hydrolase 3	Protein Coding	O95989	46	GC06M097240	8.04968	https://www.genecards.org/cgi-bin/carddisp.pl?gene=NUDT3
GALNT14	Polypeptide N-Acetylgalactosaminyltransferase 14	Protein Coding	Q96FL9	48	GC02M030888	8.0301	https://www.genecards.org/cgi-bin/carddisp.pl?gene=GALNT14
PRIMPOL	Primase And DNA Directed Polymerase	Protein Coding	Q96LW4	44	GC04P184649	8.01755	https://www.genecards.org/cgi-bin/carddisp.pl?gene=PRIMPOL
CCL19	C-C Motif Chemokine Ligand 19	Protein Coding	Q99731	53	GC09M035376	8.0108	https://www.genecards.org/cgi-bin/carddisp.pl?gene=CCL19
B4GALT4	Beta-1,4-Galactosyltransferase 4	Protein Coding	O60513	50	GC03M119211	7.94237	https://www.genecards.org/cgi-bin/carddisp.pl?gene=B4GALT4
CXCL3	C-X-C Motif Chemokine Ligand 3	Protein Coding	P19876	50	GC04M074036	7.93941	https://www.genecards.org/cgi-bin/carddisp.pl?gene=CXCL3
MIR513A1	MicroRNA 513a-1	RNA Gene		24	GC0XM147213	7.93491	https://www.genecards.org/cgi-bin/carddisp.pl?gene=MIR513A1
ADCY2	Adenylate Cyclase 2	Protein Coding	Q08462	52	GC05P007396	7.92082	https://www.genecards.org/cgi-bin/carddisp.pl?gene=ADCY2
RPLP1	Ribosomal Protein Lateral Stalk Subunit P1	Protein Coding	P05386	50	GC15P166685	7.89918	https://www.genecards.org/cgi-bin/carddisp.pl?gene=RPLP1
PTP4A2	Protein Tyrosine Phosphatase 4A2	Protein Coding	Q12974	54	GC01M031936	7.89416	https://www.genecards.org/cgi-bin/carddisp.pl?gene=PTP4A2
SLC39A5	Solute Carrier Family 39 Member 5	Protein Coding	Q6ZMH5	51	GC12P062021	7.87937	https://www.genecards.org/cgi-bin/carddisp.pl?gene=SLC39A5
ITGA1	Integrin Subunit Alpha 1	Protein Coding	P56199	58	GC05P052788	7.87607	https://www.genecards.org/cgi-bin/carddisp.pl?gene=ITGA1
LOC126807125	MED14-Independent Group 3 Enhancer GRCh37_chr4:103188587-103189786	Functional Element		6	GC04P102267	7.87436	https://www.genecards.org/cgi-bin/carddisp.pl?gene=LOC126807125
UBE2K	Ubiquitin Conjugating Enzyme E2 K	Protein Coding	P61086	54	GC04P039709	7.87166	https://www.genecards.org/cgi-bin/carddisp.pl?gene=UBE2K
CATSPER1	Cation Channel Sperm Associated 1	Protein Coding	Q8NEC5	48	GC11M129049	7.85166	https://www.genecards.org/cgi-bin/carddisp.pl?gene=CATSPER1
CXCL6	C-X-C Motif Chemokine Ligand 6	Protein Coding	P80162	51	GC04P073837	7.84986	https://www.genecards.org/cgi-bin/carddisp.pl?gene=CXCL6
NUDT10	Nudix Hydrolase 10	Protein Coding	Q8NFP7	44	GC0XP051332	7.82717	https://www.genecards.org/cgi-bin/carddisp.pl?gene=NUDT10
COPG2IT1	COPG2 Imprinted Transcript 1	RNA Gene		14	GC07P137079	7.79317	https://www.genecards.org/cgi-bin/carddisp.pl?gene=COPG2IT1
CCL1	C-C Motif Chemokine Ligand 1	Protein Coding	P22362	48	GC17M084840	7.78877	https://www.genecards.org/cgi-bin/carddisp.pl?gene=CCL1
AKAP12	A-Kinase Anchoring Protein 12	Protein Coding	Q02952	52	GC06P151239	7.78874	https://www.genecards.org/cgi-bin/carddisp.pl?gene=AKAP12
FUBP1	Far Upstream Element Binding Protein 1	Protein Coding	Q96AE4	51	GC01M077944	7.78568	https://www.genecards.org/cgi-bin/carddisp.pl?gene=FUBP1
MIR18B	MicroRNA 18b	RNA Gene		24	GC0XM134504	7.77638	https://www.genecards.org/cgi-bin/carddisp.pl?gene=MIR18B
MIR505	MicroRNA 505	RNA Gene		27	GC0XM139924	7.76735	https://www.genecards.org/cgi-bin/carddisp.pl?gene=MIR505
CLEC4A	C-Type Lectin Domain Family 4 Member A	Protein Coding	Q9UMR7	50	GC12P042159	7.76371	https://www.genecards.org/cgi-bin/carddisp.pl?gene=CLEC4A
ACSM2B	Acyl-CoA Synthetase Medium Chain Family Member 2B	Protein Coding	Q68CK6	41	GC16M026277	7.76031	https://www.genecards.org/cgi-bin/carddisp.pl?gene=ACSM2B
INTS7	Integrator Complex Subunit 7	Protein Coding	Q9NVH2	47	GC01M211940	7.74505	https://www.genecards.org/cgi-bin/carddisp.pl?gene=INTS7
TLE3	TLE Family Member 3, Transcriptional Corepressor	Protein Coding	Q04726	50	GC15M070047	7.72841	https://www.genecards.org/cgi-bin/carddisp.pl?gene=TLE3
B3GAT2	Beta-1,3-Glucuronyltransferase 2	Protein Coding	Q9NPZ5	50	GC06M070856	7.70911	https://www.genecards.org/cgi-bin/carddisp.pl?gene=B3GAT2
IRX2-DT	IRX2 Divergent Transcript	RNA Gene	Q86SI9	34	GC05P002751	7.70324	https://www.genecards.org/cgi-bin/carddisp.pl?gene=IRX2-DT
TESK1	Testis Associated Actin Remodelling Kinase 1	Protein Coding	Q15569	48	GC09P035605	7.69597	https://www.genecards.org/cgi-bin/carddisp.pl?gene=TESK1
SNORD24	Small Nucleolar RNA, C/D Box 24	RNA Gene		25	GC09P133349	7.68655	https://www.genecards.org/cgi-bin/carddisp.pl?gene=SNORD24
B4GALT3	Beta-1,4-Galactosyltransferase 3	Protein Coding	O60512	51	GC01M161171	7.64317	https://www.genecards.org/cgi-bin/carddisp.pl?gene=B4GALT3
ATOX1	Antioxidant 1 Copper Chaperone	Protein Coding	O00244	53	GC05M151743	7.62664	https://www.genecards.org/cgi-bin/carddisp.pl?gene=ATOX1
DNPEP	Aspartyl Aminopeptidase	Protein Coding	Q9ULA0	47	GC02M219373	7.61712	https://www.genecards.org/cgi-bin/carddisp.pl?gene=DNPEP
INTS9	Integrator Complex Subunit 9	Protein Coding	Q9NV88	44	GC08M028767	7.60039	https://www.genecards.org/cgi-bin/carddisp.pl?gene=INTS9
CYP20A1	Cytochrome P450 Family 20 Subfamily A Member 1	Protein Coding	Q6UW02	45	GC02P203238	7.59599	https://www.genecards.org/cgi-bin/carddisp.pl?gene=CYP20A1
MIR660	MicroRNA 660	RNA Gene		24	GC0XP050013	7.59116	https://www.genecards.org/cgi-bin/carddisp.pl?gene=MIR660
PHLPP2	PH Domain And Leucine Rich Repeat Protein Phosphatase 2	Protein Coding	Q6ZVD8	48	GC16M071637	7.59057	https://www.genecards.org/cgi-bin/carddisp.pl?gene=PHLPP2
SUPV3L1	Suv3 Like RNA Helicase	Protein Coding	Q8IYB8	50	GC10P069182	7.58657	https://www.genecards.org/cgi-bin/carddisp.pl?gene=SUPV3L1
ENDOG	Endonuclease G	Protein Coding	Q14249	56	GC09P128818	7.58646	https://www.genecards.org/cgi-bin/carddisp.pl?gene=ENDOG
ACVR1C	Activin A Receptor Type 1C	Protein Coding	Q8NER5	50	GC02M157526	7.58574	https://www.genecards.org/cgi-bin/carddisp.pl?gene=ACVR1C
RALGDS	Ral Guanine Nucleotide Dissociation Stimulator	Protein Coding	Q12967	54	GC09M133097	7.55075	https://www.genecards.org/cgi-bin/carddisp.pl?gene=RALGDS
ACSM5	Acyl-CoA Synthetase Medium Chain Family Member 5	Protein Coding	Q6NUN0	48	GC16P096272	7.51027	https://www.genecards.org/cgi-bin/carddisp.pl?gene=ACSM5
PRIM1	DNA Primase Subunit 1	Protein Coding	P49642	54	GC12M059581	7.49331	https://www.genecards.org/cgi-bin/carddisp.pl?gene=PRIM1
SLC39A1	Solute Carrier Family 39 Member 1	Protein Coding	Q9NY26	51	GC01M163912	7.487	https://www.genecards.org/cgi-bin/carddisp.pl?gene=SLC39A1
C1D	C1D Nuclear Receptor Corepressor	Protein Coding	Q13901	44	GC02M068041	7.48323	https://www.genecards.org/cgi-bin/carddisp.pl?gene=C1D
GUCY1B1	Guanylate Cyclase 1 Soluble Subunit Beta 1	Protein Coding	Q02153	52	GC04P155759	7.46078	https://www.genecards.org/cgi-bin/carddisp.pl?gene=GUCY1B1
CNDP1	Carnosine Dipeptidase 1	Protein Coding	Q96KN2	52	GC18P074534	7.45315	https://www.genecards.org/cgi-bin/carddisp.pl?gene=CNDP1
GUCY1A2	Guanylate Cyclase 1 Soluble Subunit Alpha 2	Protein Coding	P33402	48	GC11M129801	7.40806	https://www.genecards.org/cgi-bin/carddisp.pl?gene=GUCY1A2
PHLPP1	PH Domain And Leucine Rich Repeat Protein Phosphatase 1	Protein Coding	O60346	50	GC18P062715	7.39859	https://www.genecards.org/cgi-bin/carddisp.pl?gene=PHLPP1
SLC6A13	Solute Carrier Family 6 Member 13	Protein Coding	Q9NSD5	54	GC12M000200	7.34967	https://www.genecards.org/cgi-bin/carddisp.pl?gene=SLC6A13
MOBP	Myelin Associated Oligodendrocyte Basic Protein	Protein Coding	Q13875	48	GC03P041013	7.34872	https://www.genecards.org/cgi-bin/carddisp.pl?gene=MOBP
SLC22A11	Solute Carrier Family 22 Member 11	Protein Coding	Q9NSA0	51	GC11P094506	7.34799	https://www.genecards.org/cgi-bin/carddisp.pl?gene=SLC22A11
GALNT4	Polypeptide N-Acetylgalactosaminyltransferase 4	Protein Coding	Q8N4A0	47	GC12M089520	7.34181	https://www.genecards.org/cgi-bin/carddisp.pl?gene=GALNT4
DHDH	Dihydrodiol Dehydrogenase	Protein Coding	Q9UQ10	45	GC19P123393	7.33399	https://www.genecards.org/cgi-bin/carddisp.pl?gene=DHDH
ICAM3	Intercellular Adhesion Molecule 3	Protein Coding	P32942	55	GC19M096165	7.3216	https://www.genecards.org/cgi-bin/carddisp.pl?gene=ICAM3
DCD	Dermcidin	Protein Coding	P81605	45	GC12M054644	7.30444	https://www.genecards.org/cgi-bin/carddisp.pl?gene=DCD
CLDN10	Claudin 10	Protein Coding	P78369	52	GC13P095433	7.29896	https://www.genecards.org/cgi-bin/carddisp.pl?gene=CLDN10
YES1	YES Proto-Oncogene 1, Src Family Tyrosine Kinase	Protein Coding	P07947	55	GC18M000721	7.28957	https://www.genecards.org/cgi-bin/carddisp.pl?gene=YES1
B4GALT2	Beta-1,4-Galactosyltransferase 2	Protein Coding	O60909	49	GC01P043978	7.28579	https://www.genecards.org/cgi-bin/carddisp.pl?gene=B4GALT2
RAP1GAP	RAP1 GTPase Activating Protein	Protein Coding	P47736	48	GC01M021596	7.27689	https://www.genecards.org/cgi-bin/carddisp.pl?gene=RAP1GAP
CARD16	Caspase Recruitment Domain Family Member 16	Protein Coding	Q5EG05	45	GC11M105041	7.26066	https://www.genecards.org/cgi-bin/carddisp.pl?gene=CARD16
GALNT9	Polypeptide N-Acetylgalactosaminyltransferase 9	Protein Coding	Q9HCQ5	48	GC12M132196	7.24442	https://www.genecards.org/cgi-bin/carddisp.pl?gene=GALNT9
CSGALNACT2	Chondroitin Sulfate N-Acetylgalactosaminyltransferase 2	Protein Coding	Q8N6G5	49	GC10P043138	7.24232	https://www.genecards.org/cgi-bin/carddisp.pl?gene=CSGALNACT2
BACE2	Beta-Secretase 2	Protein Coding	Q9Y5Z0	54	GC21P041168	7.22859	https://www.genecards.org/cgi-bin/carddisp.pl?gene=BACE2
PRIM2	DNA Primase Subunit 2	Protein Coding	P49643	50	GC06P145134	7.22686	https://www.genecards.org/cgi-bin/carddisp.pl?gene=PRIM2
CA3	Carbonic Anhydrase 3	Protein Coding	P07451	54	GC08P085373	7.21955	https://www.genecards.org/cgi-bin/carddisp.pl?gene=CA3
ME3	Malic Enzyme 3	Protein Coding	Q16798	47	GC11M129524	7.21706	https://www.genecards.org/cgi-bin/carddisp.pl?gene=ME3
PPM1F	Protein Phosphatase, Mg2+/Mn2+ Dependent 1F	Protein Coding	P49593	50	GC22M021919	7.20806	https://www.genecards.org/cgi-bin/carddisp.pl?gene=PPM1F
SETD7	SET Domain Containing 7, Histone Lysine Methyltransferase	Protein Coding	Q8WTS6	58	GC04M139495	7.20574	https://www.genecards.org/cgi-bin/carddisp.pl?gene=SETD7
TUBA1C	Tubulin Alpha 1c	Protein Coding	Q9BQE3	50	GC12P049188	7.19128	https://www.genecards.org/cgi-bin/carddisp.pl?gene=TUBA1C
NUDT7	Nudix Hydrolase 7	Protein Coding	P0C024	45	GC16P077722	7.18021	https://www.genecards.org/cgi-bin/carddisp.pl?gene=NUDT7
LOC108663987	Ataxin 3 Repeat Instability Region	Functional Element		10	GC14P092071	7.17447	https://www.genecards.org/cgi-bin/carddisp.pl?gene=LOC108663987
RGN	Regucalcin	Protein Coding	Q15493	48	GC0XP058303	7.16006	https://www.genecards.org/cgi-bin/carddisp.pl?gene=RGN
TNFRSF12A	TNF Receptor Superfamily Member 12A	Protein Coding	Q9NP84	53	GC16P003018	7.15269	https://www.genecards.org/cgi-bin/carddisp.pl?gene=TNFRSF12A
PAK4	P21 (RAC1) Activated Kinase 4	Protein Coding	O96013	62	GC19P039125	7.14535	https://www.genecards.org/cgi-bin/carddisp.pl?gene=PAK4
LUCAT1	Lung Cancer Associated Transcript 1	RNA Gene		24	GC05M091054	7.13705	https://www.genecards.org/cgi-bin/carddisp.pl?gene=LUCAT1
UGGT1	UDP-Glucose Glycoprotein Glucosyltransferase 1	Protein Coding	Q9NYU2	49	GC02P128091	7.12842	https://www.genecards.org/cgi-bin/carddisp.pl?gene=UGGT1
GOLIM4	Golgi Integral Membrane Protein 4	Protein Coding	O00461	45	GC03M168008	7.12391	https://www.genecards.org/cgi-bin/carddisp.pl?gene=GOLIM4
MT1E	Metallothionein 1E	Protein Coding	P04732	51	GC16P056625	7.11983	https://www.genecards.org/cgi-bin/carddisp.pl?gene=MT1E
FUT7	Fucosyltransferase 7	Protein Coding	Q11130	51	GC09M137030	7.11838	https://www.genecards.org/cgi-bin/carddisp.pl?gene=FUT7
AMY2A	Amylase Alpha 2A	Protein Coding	P04746	51	GC01P103616	7.11126	https://www.genecards.org/cgi-bin/carddisp.pl?gene=AMY2A
ACSM1	Acyl-CoA Synthetase Medium Chain Family Member 1	Protein Coding	Q08AH1	48	GC16M026279	7.08701	https://www.genecards.org/cgi-bin/carddisp.pl?gene=ACSM1
NUDT8	Nudix Hydrolase 8	Protein Coding	Q8WV74	41	GC11M067627	7.07904	https://www.genecards.org/cgi-bin/carddisp.pl?gene=NUDT8
REXO2	RNA Exonuclease 2	Protein Coding	Q9Y3B8	46	GC11P114439	7.07685	https://www.genecards.org/cgi-bin/carddisp.pl?gene=REXO2
PAPOLA	Poly(A) Polymerase Alpha	Protein Coding	P51003	52	GC14P096501	7.05508	https://www.genecards.org/cgi-bin/carddisp.pl?gene=PAPOLA
PPME1	Protein Phosphatase Methylesterase 1	Protein Coding	Q9Y570	45	GC11P095270	7.04885	https://www.genecards.org/cgi-bin/carddisp.pl?gene=PPME1
PPM1G	Protein Phosphatase, Mg2+/Mn2+ Dependent 1G	Protein Coding	O15355	50	GC02M028947	7.04511	https://www.genecards.org/cgi-bin/carddisp.pl?gene=PPM1G
DGLUCY	D-Glutamate Cyclase	Protein Coding	Q7Z3D6	43	GC14P093252	7.01617	https://www.genecards.org/cgi-bin/carddisp.pl?gene=DGLUCY
ITGB7	Integrin Subunit Beta 7	Protein Coding	P26010	56	GC12M053191	6.97895	https://www.genecards.org/cgi-bin/carddisp.pl?gene=ITGB7
PTGIR	Prostaglandin I2 Receptor	Protein Coding	P43119	58	GC19M097078	6.96546	https://www.genecards.org/cgi-bin/carddisp.pl?gene=PTGIR
CHPF	Chondroitin Polymerizing Factor	Protein Coding	Q8IZ52	47	GC02M219538	6.95544	https://www.genecards.org/cgi-bin/carddisp.pl?gene=CHPF
MIR1247	MicroRNA 1247	RNA Gene		27	GC14M101560	6.93767	https://www.genecards.org/cgi-bin/carddisp.pl?gene=MIR1247
B3GALT1	Beta-1,3-Galactosyltransferase 1	Protein Coding	Q9Y5Z6	40	GC02P167300	6.91525	https://www.genecards.org/cgi-bin/carddisp.pl?gene=B3GALT1
GALNT11	Polypeptide N-Acetylgalactosaminyltransferase 11	Protein Coding	Q8NCW6	49	GC07P152025	6.8776	https://www.genecards.org/cgi-bin/carddisp.pl?gene=GALNT11
PID1	Phosphotyrosine Interaction Domain Containing 1	Protein Coding	Q7Z2X4	39	GC02M228850	6.85862	https://www.genecards.org/cgi-bin/carddisp.pl?gene=PID1
OAS2	2'-5'-Oligoadenylate Synthetase 2	Protein Coding	P29728	51	GC12P112978	6.82101	https://www.genecards.org/cgi-bin/carddisp.pl?gene=OAS2
GALNT10	Polypeptide N-Acetylgalactosaminyltransferase 10	Protein Coding	Q86SR1	45	GC05P154190	6.78092	https://www.genecards.org/cgi-bin/carddisp.pl?gene=GALNT10
H2BC12L	H2B Clustered Histone 12 Like	Protein Coding	P57053	39	GC21P048740	6.76952	https://www.genecards.org/cgi-bin/carddisp.pl?gene=H2BC12L
NMT1	N-Myristoyltransferase 1	Protein Coding	P30419	51	GC17P123132	6.7653	https://www.genecards.org/cgi-bin/carddisp.pl?gene=NMT1
HMGCLL1	3-Hydroxy-3-Methylglutaryl-CoA Lyase Like 1	Protein Coding	Q8TB92	47	GC06M055434	6.7231	https://www.genecards.org/cgi-bin/carddisp.pl?gene=HMGCLL1
GBGT1	Globoside Alpha-1,3-N-Acetylgalactosaminyltransferase 1 (FORS Blood Group)	Protein Coding	Q8N5D6	45	GC09M133152	6.71502	https://www.genecards.org/cgi-bin/carddisp.pl?gene=GBGT1
GALNTL5	Polypeptide N-Acetylgalactosaminyltransferase Like 5	Protein Coding	Q7Z4T8	50	GC07P151956	6.70544	https://www.genecards.org/cgi-bin/carddisp.pl?gene=GALNTL5
MPPE1	Metallophosphoesterase 1	Protein Coding	Q53F39	47	GC18M034973	6.6757	https://www.genecards.org/cgi-bin/carddisp.pl?gene=MPPE1
ST8SIA4	ST8 Alpha-N-Acetyl-Neuraminide Alpha-2,8-Sialyltransferase 4	Protein Coding	Q92187	48	GC05M100806	6.66658	https://www.genecards.org/cgi-bin/carddisp.pl?gene=ST8SIA4
ITGB5	Integrin Subunit Beta 5	Protein Coding	P18084	56	GC03M124761	6.66396	https://www.genecards.org/cgi-bin/carddisp.pl?gene=ITGB5
DYRK2	Dual Specificity Tyrosine Phosphorylation Regulated Kinase 2	Protein Coding	Q92630	53	GC12P067664	6.66089	https://www.genecards.org/cgi-bin/carddisp.pl?gene=DYRK2
ACP4	Acid Phosphatase 4	Protein Coding	Q9BZG2	44	GC19P123489	6.65963	https://www.genecards.org/cgi-bin/carddisp.pl?gene=ACP4
ADCY9	Adenylate Cyclase 9	Protein Coding	O60503	56	GC16M003953	6.64827	https://www.genecards.org/cgi-bin/carddisp.pl?gene=ADCY9
FTMT	Ferritin Mitochondrial	Protein Coding	Q8N4E7	50	GC05P121851	6.64209	https://www.genecards.org/cgi-bin/carddisp.pl?gene=FTMT
HELB	DNA Helicase B	Protein Coding	Q8NG08	44	GC12P066302	6.62209	https://www.genecards.org/cgi-bin/carddisp.pl?gene=HELB
NPEPL1	Aminopeptidase Like 1	Protein Coding	Q8NDH3	41	GC20P058689	6.61983	https://www.genecards.org/cgi-bin/carddisp.pl?gene=NPEPL1
HLA-DRB4	Major Histocompatibility Complex, Class II, DR Beta 4	Protein Coding	P13762	37	GC06Mo03851	6.6137	https://www.genecards.org/cgi-bin/carddisp.pl?gene=HLA-DRB4
POLM	DNA Polymerase Mu	Protein Coding	Q9NP87	52	GC07M045425	6.61144	https://www.genecards.org/cgi-bin/carddisp.pl?gene=POLM
ACSM4	Acyl-CoA Synthetase Medium Chain Family Member 4	Protein Coding	P0C7M7	42	GC12P007304	6.58937	https://www.genecards.org/cgi-bin/carddisp.pl?gene=ACSM4
TRIM9	Tripartite Motif Containing 9	Protein Coding	Q9C026	48	GC14M050975	6.56523	https://www.genecards.org/cgi-bin/carddisp.pl?gene=TRIM9
MADCAM1	Mucosal Vascular Addressin Cell Adhesion Molecule 1	Protein Coding	Q13477	52	GC19P121785	6.5493	https://www.genecards.org/cgi-bin/carddisp.pl?gene=MADCAM1
RIMKLB	Ribosomal Modification Protein RimK Like Family Member B	Protein Coding	Q9ULI2	40	GC12P042197	6.52612	https://www.genecards.org/cgi-bin/carddisp.pl?gene=RIMKLB
LINC01194	Long Intergenic Non-Protein Coding RNA 1194	RNA Gene		25	GC05P012530	6.47028	https://www.genecards.org/cgi-bin/carddisp.pl?gene=LINC01194
PDE9A	Phosphodiesterase 9A	Protein Coding	O76083	54	GC21P042653	6.4354	https://www.genecards.org/cgi-bin/carddisp.pl?gene=PDE9A
GALNT7	Polypeptide N-Acetylgalactosaminyltransferase 7	Protein Coding	Q86SF2	44	GC04P173168	6.43235	https://www.genecards.org/cgi-bin/carddisp.pl?gene=GALNT7
MGAT5B	Alpha-1,6-Mannosylglycoprotein 6-Beta-N-Acetylglucosaminyltransferase B	Protein Coding	Q3V5L5	48	GC17P076868	6.42909	https://www.genecards.org/cgi-bin/carddisp.pl?gene=MGAT5B
RGS19	Regulator Of G Protein Signaling 19	Protein Coding	P49795	53	GC20M064073	6.42867	https://www.genecards.org/cgi-bin/carddisp.pl?gene=RGS19
GOLGB1	Golgin B1	Protein Coding	Q14789	45	GC03M121663	6.41602	https://www.genecards.org/cgi-bin/carddisp.pl?gene=GOLGB1
GRK6	G Protein-Coupled Receptor Kinase 6	Protein Coding	P43250	55	GC05P177403	6.40943	https://www.genecards.org/cgi-bin/carddisp.pl?gene=GRK6
SLC25A39	Solute Carrier Family 25 Member 39	Protein Coding	Q9BZJ4	45	GC17M044319	6.40443	https://www.genecards.org/cgi-bin/carddisp.pl?gene=SLC25A39
NUDT9	Nudix Hydrolase 9	Protein Coding	Q9BW91	48	GC04P087422	6.3905	https://www.genecards.org/cgi-bin/carddisp.pl?gene=NUDT9
MATN1	Matrilin 1	Protein Coding	P21941	51	GC01M030711	6.38795	https://www.genecards.org/cgi-bin/carddisp.pl?gene=MATN1
SLC39A10	Solute Carrier Family 39 Member 10	Protein Coding	Q9ULF5	50	GC02P195575	6.38503	https://www.genecards.org/cgi-bin/carddisp.pl?gene=SLC39A10
RTCB	RNA 2',3'-Cyclic Phosphate And 5'-OH Ligase	Protein Coding	Q9Y3I0	44	GC22M032387	6.35971	https://www.genecards.org/cgi-bin/carddisp.pl?gene=RTCB
QPRT	Quinolinate Phosphoribosyltransferase	Protein Coding	Q15274	51	GC16P096657	6.33414	https://www.genecards.org/cgi-bin/carddisp.pl?gene=QPRT
FNTA	Farnesyltransferase, CAAX Box, Subunit Alpha	Protein Coding	P49354	52	GC08P043034	6.32582	https://www.genecards.org/cgi-bin/carddisp.pl?gene=FNTA
CCL23	C-C Motif Chemokine Ligand 23	Protein Coding	P55773	45	GC17M036013	6.27198	https://www.genecards.org/cgi-bin/carddisp.pl?gene=CCL23
PPEF1	Protein Phosphatase With EF-Hand Domain 1	Protein Coding	O14829	47	GC0XP018676	6.25948	https://www.genecards.org/cgi-bin/carddisp.pl?gene=PPEF1
GDPD1	Glycerophosphodiester Phosphodiesterase Domain Containing 1	Protein Coding	Q8N9F7	47	GC17P059220	6.25555	https://www.genecards.org/cgi-bin/carddisp.pl?gene=GDPD1
CMKLR1	Chemerin Chemokine-Like Receptor 1	Protein Coding	Q99788	53	GC12M108288	6.24778	https://www.genecards.org/cgi-bin/carddisp.pl?gene=CMKLR1
ITIH1	Inter-Alpha-Trypsin Inhibitor Heavy Chain 1	Protein Coding	P19827	47	GC03P052777	6.2335	https://www.genecards.org/cgi-bin/carddisp.pl?gene=ITIH1
SNORD43	Small Nucleolar RNA, C/D Box 43	RNA Gene		19	GC22M081067	6.23185	https://www.genecards.org/cgi-bin/carddisp.pl?gene=SNORD43
PPP1R2	Protein Phosphatase 1 Regulatory Inhibitor Subunit 2	Protein Coding	P41236	48	GC03M195515	6.17146	https://www.genecards.org/cgi-bin/carddisp.pl?gene=PPP1R2
GUCA2B	Guanylate Cyclase Activator 2B	Protein Coding	Q16661	49	GC01P042153	6.15853	https://www.genecards.org/cgi-bin/carddisp.pl?gene=GUCA2B
APLP1	Amyloid Beta Precursor Like Protein 1	Protein Coding	P51693	52	GC19P122940	6.15842	https://www.genecards.org/cgi-bin/carddisp.pl?gene=APLP1
TTBK1	Tau Tubulin Kinase 1	Protein Coding	Q5TCY1	51	GC06P043243	6.14275	https://www.genecards.org/cgi-bin/carddisp.pl?gene=TTBK1
PDXP	Pyridoxal Phosphatase	Protein Coding	Q96GD0	45	GC22P037658	6.13483	https://www.genecards.org/cgi-bin/carddisp.pl?gene=PDXP
GALNT18	Polypeptide N-Acetylgalactosaminyltransferase 18	Protein Coding	Q6P9A2	42	GC11M012991	6.12126	https://www.genecards.org/cgi-bin/carddisp.pl?gene=GALNT18
ACP6	Acid Phosphatase 6, Lysophosphatidic	Protein Coding	Q9NPH0	51	GC01M163571	6.11517	https://www.genecards.org/cgi-bin/carddisp.pl?gene=ACP6
CHSY3	Chondroitin Sulfate Synthase 3	Protein Coding	Q70JA7	45	GC05P129904	6.08692	https://www.genecards.org/cgi-bin/carddisp.pl?gene=CHSY3
STH	Saitohin	Protein Coding	Q8IWL8	41	GC17P045999	6.06329	https://www.genecards.org/cgi-bin/carddisp.pl?gene=STH
RAP2A	RAP2A, Member Of RAS Oncogene Family	Protein Coding	P10114	48	GC13P097445	6.05294	https://www.genecards.org/cgi-bin/carddisp.pl?gene=RAP2A
MIR507	MicroRNA 507	RNA Gene		21	GC0XM147246	6.04545	https://www.genecards.org/cgi-bin/carddisp.pl?gene=MIR507
ITIH2	Inter-Alpha-Trypsin Inhibitor Heavy Chain 2	Protein Coding	P19823	48	GC10P007703	6.03963	https://www.genecards.org/cgi-bin/carddisp.pl?gene=ITIH2
ALKBH7	AlkB Homolog 7	Protein Coding	Q9BT30	39	GC19P006372	6.03808	https://www.genecards.org/cgi-bin/carddisp.pl?gene=ALKBH7
INPP5F	Inositol Polyphosphate-5-Phosphatase F	Protein Coding	Q9Y2H2	45	GC10P119726	6.03158	https://www.genecards.org/cgi-bin/carddisp.pl?gene=INPP5F
SLC25A40	Solute Carrier Family 25 Member 40	Protein Coding	Q8TBP6	41	GC07M087833	6.01464	https://www.genecards.org/cgi-bin/carddisp.pl?gene=SLC25A40
PPM1M	Protein Phosphatase, Mg2+/Mn2+ Dependent 1M	Protein Coding	Q96MI6	43	GC03P052245	6.0135	https://www.genecards.org/cgi-bin/carddisp.pl?gene=PPM1M
SLC39A2	Solute Carrier Family 39 Member 2	Protein Coding	Q9NP94	46	GC14P047789	6.00796	https://www.genecards.org/cgi-bin/carddisp.pl?gene=SLC39A2
MT1G	Metallothionein 1G	Protein Coding	P13640	41	GC16M056666	6.00477	https://www.genecards.org/cgi-bin/carddisp.pl?gene=MT1G
GALNT13	Polypeptide N-Acetylgalactosaminyltransferase 13	Protein Coding	Q8IUC8	46	GC02P153069	5.99788	https://www.genecards.org/cgi-bin/carddisp.pl?gene=GALNT13
PGK2	Phosphoglycerate Kinase 2	Protein Coding	P07205	51	GC06M049785	5.99715	https://www.genecards.org/cgi-bin/carddisp.pl?gene=PGK2
NUDT4	Nudix Hydrolase 4	Protein Coding	Q9NZJ9	42	GC12P093540	5.99631	https://www.genecards.org/cgi-bin/carddisp.pl?gene=NUDT4
NUDT19	Nudix Hydrolase 19	Protein Coding	A8MXV4	44	GC19P122862	5.92127	https://www.genecards.org/cgi-bin/carddisp.pl?gene=NUDT19
RCN1	Reticulocalbin 1	Protein Coding	Q15293	51	GC11P032090	5.91333	https://www.genecards.org/cgi-bin/carddisp.pl?gene=RCN1
EPHB3	EPH Receptor B3	Protein Coding	P54753	58	GC03P184561	5.91212	https://www.genecards.org/cgi-bin/carddisp.pl?gene=EPHB3
LOC111365141	NOS2 5' Regulatory Region	Functional Element		8	GC17P027800	5.88398	https://www.genecards.org/cgi-bin/carddisp.pl?gene=LOC111365141
GALNT15	Polypeptide N-Acetylgalactosaminyltransferase 15	Protein Coding	Q8N3T1	44	GC03P016174	5.86933	https://www.genecards.org/cgi-bin/carddisp.pl?gene=GALNT15
HAR1A	Highly Accelerated Region 1A	RNA Gene		28	GC20P063101	5.84677	https://www.genecards.org/cgi-bin/carddisp.pl?gene=HAR1A
PPP4C	Protein Phosphatase 4 Catalytic Subunit	Protein Coding	P60510	54	GC16P096683	5.84398	https://www.genecards.org/cgi-bin/carddisp.pl?gene=PPP4C
LOC130004273	ATAC-STARR-Seq Lymphoblastoid Silent Region 2585	Functional Element		8	GC10P114735	5.83699	https://www.genecards.org/cgi-bin/carddisp.pl?gene=LOC130004273
RBKS	Ribokinase	Protein Coding	Q9H477	45	GC02M027781	5.82735	https://www.genecards.org/cgi-bin/carddisp.pl?gene=RBKS
MIR629	MicroRNA 629	RNA Gene		27	GC15M070079	5.82525	https://www.genecards.org/cgi-bin/carddisp.pl?gene=MIR629
INTS12	Integrator Complex Subunit 12	Protein Coding	Q96CB8	40	GC04M105682	5.82347	https://www.genecards.org/cgi-bin/carddisp.pl?gene=INTS12
GALNT8	Polypeptide N-Acetylgalactosaminyltransferase 8	Protein Coding	Q9NY28	42	GC12P004720	5.82063	https://www.genecards.org/cgi-bin/carddisp.pl?gene=GALNT8
ANXA3	Annexin A3	Protein Coding	P12429	55	GC04P078551	5.76878	https://www.genecards.org/cgi-bin/carddisp.pl?gene=ANXA3
GALNT6	Polypeptide N-Acetylgalactosaminyltransferase 6	Protein Coding	Q8NCL4	47	GC12M051351	5.73942	https://www.genecards.org/cgi-bin/carddisp.pl?gene=GALNT6
TST	Thiosulfate Sulfurtransferase	Protein Coding	Q16762	52	GC22M037010	5.72788	https://www.genecards.org/cgi-bin/carddisp.pl?gene=TST
PITPNA	Phosphatidylinositol Transfer Protein Alpha	Protein Coding	Q00169	50	GC17M083847	5.72197	https://www.genecards.org/cgi-bin/carddisp.pl?gene=PITPNA
ZNF160	Zinc Finger Protein 160	Protein Coding	Q9HCG1	45	GC19M053066	5.71937	https://www.genecards.org/cgi-bin/carddisp.pl?gene=ZNF160
HCAR2	Hydroxycarboxylic Acid Receptor 2	Protein Coding	Q8TDS4	49	GC12M122701	5.71842	https://www.genecards.org/cgi-bin/carddisp.pl?gene=HCAR2
SMG6	SMG6 Nonsense Mediated MRNA Decay Factor	Protein Coding	Q86US8	47	GC17M002059	5.712	https://www.genecards.org/cgi-bin/carddisp.pl?gene=SMG6
NCS1	Neuronal Calcium Sensor 1	Protein Coding	P62166	55	GC09P130172	5.70034	https://www.genecards.org/cgi-bin/carddisp.pl?gene=NCS1
MIR1228	MicroRNA 1228	RNA Gene		25	GC12P057194	5.69062	https://www.genecards.org/cgi-bin/carddisp.pl?gene=MIR1228
RNGTT	RNA Guanylyltransferase And 5'-Phosphatase	Protein Coding	O60942	52	GC06M088609	5.6707	https://www.genecards.org/cgi-bin/carddisp.pl?gene=RNGTT
NAPRT	Nicotinate Phosphoribosyltransferase	Protein Coding	Q6XQN6	48	GC08M146742	5.66107	https://www.genecards.org/cgi-bin/carddisp.pl?gene=NAPRT
ADAM15	ADAM Metallopeptidase Domain 15	Protein Coding	Q13444	56	GC01P155050	5.6549	https://www.genecards.org/cgi-bin/carddisp.pl?gene=ADAM15
MPPED2	Metallophosphoesterase Domain Containing 2	Protein Coding	Q15777	48	GC11M030406	5.63534	https://www.genecards.org/cgi-bin/carddisp.pl?gene=MPPED2
SERGEF	Secretion Regulating Guanine Nucleotide Exchange Factor	Protein Coding	Q9UGK8	45	GC11M017994	5.62029	https://www.genecards.org/cgi-bin/carddisp.pl?gene=SERGEF
ATP8A1	ATPase Phospholipid Transporting 8A1	Protein Coding	Q9Y2Q0	51	GC04M042410	5.56317	https://www.genecards.org/cgi-bin/carddisp.pl?gene=ATP8A1
TESK2	Testis Associated Actin Remodelling Kinase 2	Protein Coding	Q96S53	42	GC01M045343	5.52921	https://www.genecards.org/cgi-bin/carddisp.pl?gene=TESK2
GBX2	Gastrulation Brain Homeobox 2	Protein Coding	P52951	49	GC02M236165	5.52901	https://www.genecards.org/cgi-bin/carddisp.pl?gene=GBX2
IGES	Immunoglobulin E Concentration, Serum	Genetic Locus		11	GC05U990033	5.50982	https://www.genecards.org/cgi-bin/carddisp.pl?gene=IGES
SEPTIN7	Septin 7	Protein Coding	Q16181	46	GC07P036833	5.49933	https://www.genecards.org/cgi-bin/carddisp.pl?gene=SEPTIN7
PPTC7	Protein Phosphatase Targeting COQ7	Protein Coding	Q8NI37	41	GC12M110533	5.49337	https://www.genecards.org/cgi-bin/carddisp.pl?gene=PPTC7
RIMKLA	Ribosomal Modification Protein RimK Like Family Member A	Protein Coding	Q8IXN7	42	GC01P042380	5.4543	https://www.genecards.org/cgi-bin/carddisp.pl?gene=RIMKLA
POLA2	DNA Polymerase Alpha 2, Accessory Subunit	Protein Coding	Q14181	51	GC11P094614	5.44757	https://www.genecards.org/cgi-bin/carddisp.pl?gene=POLA2
LMO4	LIM Domain Only 4	Protein Coding	P61968	50	GC01P087364	5.44169	https://www.genecards.org/cgi-bin/carddisp.pl?gene=LMO4
LARGE2	LARGE Xylosyl- And Glucuronyltransferase 2	Protein Coding	Q8N3Y3	50	GC11P048025	5.40717	https://www.genecards.org/cgi-bin/carddisp.pl?gene=LARGE2
DFFB	DNA Fragmentation Factor Subunit Beta	Protein Coding	O76075	48	GC01P003857	5.40329	https://www.genecards.org/cgi-bin/carddisp.pl?gene=DFFB
MPP2	MAGUK P55 Scaffold Protein 2	Protein Coding	Q14168	47	GC17M043875	5.40176	https://www.genecards.org/cgi-bin/carddisp.pl?gene=MPP2
P2RY6	Pyrimidinergic Receptor P2Y6	Protein Coding	Q15077	52	GC11P073264	5.32885	https://www.genecards.org/cgi-bin/carddisp.pl?gene=P2RY6
MFAP2	Microfibril Associated Protein 2	Protein Coding	P55001	51	GC01M016974	5.31763	https://www.genecards.org/cgi-bin/carddisp.pl?gene=MFAP2
COPE	COPI Coat Complex Subunit Epsilon	Protein Coding	O14579	47	GC19M018899	5.27893	https://www.genecards.org/cgi-bin/carddisp.pl?gene=COPE
TPST1	Tyrosylprotein Sulfotransferase 1	Protein Coding	O60507	50	GC07P088184	5.26884	https://www.genecards.org/cgi-bin/carddisp.pl?gene=TPST1
TPPP3	Tubulin Polymerization Promoting Protein Family Member 3	Protein Coding	Q9BW30	47	GC16M067389	5.25329	https://www.genecards.org/cgi-bin/carddisp.pl?gene=TPPP3
IDNK	IDNK Gluconokinase	Protein Coding	Q5T6J7	42	GC09P083623	5.23212	https://www.genecards.org/cgi-bin/carddisp.pl?gene=IDNK
APEX2	Apurinic/Apyrimidinic Endodeoxyribonuclease 2	Protein Coding	Q9UBZ4	46	GC0XP055000	5.22254	https://www.genecards.org/cgi-bin/carddisp.pl?gene=APEX2
PCSK1N	Proprotein Convertase Subtilisin/Kexin Type 1 Inhibitor	Protein Coding	Q9UHG2	45	GC0XM048831	5.2225	https://www.genecards.org/cgi-bin/carddisp.pl?gene=PCSK1N
S100G	S100 Calcium Binding Protein G	Protein Coding	P29377	47	GC0XP016668	5.21844	https://www.genecards.org/cgi-bin/carddisp.pl?gene=S100G
PDIA2	Protein Disulfide Isomerase Family A Member 2	Protein Coding	Q13087	52	GC16P095736	5.20903	https://www.genecards.org/cgi-bin/carddisp.pl?gene=PDIA2
FNTB	Farnesyltransferase, CAAX Box, Subunit Beta	Protein Coding	P49356	49	GC14P064986	5.20735	https://www.genecards.org/cgi-bin/carddisp.pl?gene=FNTB
ROMO1	Reactive Oxygen Species Modulator 1	Protein Coding	P60602	41	GC20P035699	5.1847	https://www.genecards.org/cgi-bin/carddisp.pl?gene=ROMO1
TOP1MT	DNA Topoisomerase I Mitochondrial	Protein Coding	Q969P6	50	GC08M143304	5.17717	https://www.genecards.org/cgi-bin/carddisp.pl?gene=TOP1MT
PCOLCE	Procollagen C-Endopeptidase Enhancer	Protein Coding	Q15113	51	GC07P100602	5.17063	https://www.genecards.org/cgi-bin/carddisp.pl?gene=PCOLCE
SLC8A3	Solute Carrier Family 8 Member A3	Protein Coding	P57103	54	GC14M070044	5.14224	https://www.genecards.org/cgi-bin/carddisp.pl?gene=SLC8A3
CSPG4	Chondroitin Sulfate Proteoglycan 4	Protein Coding	Q6UVK1	59	GC15M075674	5.13871	https://www.genecards.org/cgi-bin/carddisp.pl?gene=CSPG4
SELENOF	Selenoprotein F	Protein Coding	O60613	43	GC01M086863	5.11294	https://www.genecards.org/cgi-bin/carddisp.pl?gene=SELENOF
PPM1E	Protein Phosphatase, Mg2+/Mn2+ Dependent 1E	Protein Coding	Q8WY54	47	GC17P123473	5.10527	https://www.genecards.org/cgi-bin/carddisp.pl?gene=PPM1E
ILKAP	ILK Associated Serine/Threonine Phosphatase	Protein Coding	Q9H0C8	48	GC02M238170	5.10525	https://www.genecards.org/cgi-bin/carddisp.pl?gene=ILKAP
TIMM23	Translocase Of Inner Mitochondrial Membrane 23	Protein Coding	O14925	45	GC10P045972	5.06541	https://www.genecards.org/cgi-bin/carddisp.pl?gene=TIMM23
HCAR1	Hydroxycarboxylic Acid Receptor 1	Protein Coding	Q9BXC0	47	GC12M122726	5.0477	https://www.genecards.org/cgi-bin/carddisp.pl?gene=HCAR1
UGGT2	UDP-Glucose Glycoprotein Glucosyltransferase 2	Protein Coding	Q9NYU1	47	GC13M095801	5.0396	https://www.genecards.org/cgi-bin/carddisp.pl?gene=UGGT2
CAMK1	Calcium/Calmodulin Dependent Protein Kinase I	Protein Coding	Q14012	48	GC03M009774	5.03828	https://www.genecards.org/cgi-bin/carddisp.pl?gene=CAMK1
CARNS1	Carnosine Synthase 1	Protein Coding	A5YM72	43	GC11P067414	5.03667	https://www.genecards.org/cgi-bin/carddisp.pl?gene=CARNS1
NUDT11	Nudix Hydrolase 11	Protein Coding	Q96G61	43	GC0XM051490	5.02118	https://www.genecards.org/cgi-bin/carddisp.pl?gene=NUDT11
GAL3ST4	Galactose-3-O-Sulfotransferase 4	Protein Coding	Q96RP7	44	GC07M100159	5.01423	https://www.genecards.org/cgi-bin/carddisp.pl?gene=GAL3ST4
LOC126861339	BRD4-Independent Group 4 Enhancer GRCh37_chr11:111957035-111958234	Functional Element		8	GC11P112616	4.97661	https://www.genecards.org/cgi-bin/carddisp.pl?gene=LOC126861339
ITGB8	Integrin Subunit Beta 8	Protein Coding	P26012	50	GC07P020329	4.95245	https://www.genecards.org/cgi-bin/carddisp.pl?gene=ITGB8
NUDT18	Nudix Hydrolase 18	Protein Coding	Q6ZVK8	40	GC08M022106	4.90023	https://www.genecards.org/cgi-bin/carddisp.pl?gene=NUDT18
SLFN11	Schlafen Family Member 11	Protein Coding	Q7Z7L1	44	GC17M035350	4.90013	https://www.genecards.org/cgi-bin/carddisp.pl?gene=SLFN11
STATH	Statherin	Protein Coding	P02808	44	GC04P069995	4.89914	https://www.genecards.org/cgi-bin/carddisp.pl?gene=STATH
GALNT16	Polypeptide N-Acetylgalactosaminyltransferase 16	Protein Coding	Q8N428	45	GC14P069259	4.89831	https://www.genecards.org/cgi-bin/carddisp.pl?gene=GALNT16
GPR4	G Protein-Coupled Receptor 4	Protein Coding	P46093	50	GC19M045589	4.86383	https://www.genecards.org/cgi-bin/carddisp.pl?gene=GPR4
GALNTL6	Polypeptide N-Acetylgalactosaminyltransferase Like 6	Protein Coding	Q49A17	43	GC04P171813	4.85753	https://www.genecards.org/cgi-bin/carddisp.pl?gene=GALNTL6
PIF1	PIF1 5'-To-3' DNA Helicase	Protein Coding	Q9H611	47	GC15M064815	4.82652	https://www.genecards.org/cgi-bin/carddisp.pl?gene=PIF1
ENDOU	Endonuclease, Poly(U) Specific	Protein Coding	P21128	43	GC12M047709	4.81301	https://www.genecards.org/cgi-bin/carddisp.pl?gene=ENDOU
SNORD16	Small Nucleolar RNA, C/D Box 16	RNA Gene		22	GC15M151691	4.80173	https://www.genecards.org/cgi-bin/carddisp.pl?gene=SNORD16
GLRX2	Glutaredoxin 2	Protein Coding	Q9NS18	44	GC01M193065	4.75644	https://www.genecards.org/cgi-bin/carddisp.pl?gene=GLRX2
SNORA66	Small Nucleolar RNA, H/ACA Box 66	RNA Gene		24	GC01P092840	4.75557	https://www.genecards.org/cgi-bin/carddisp.pl?gene=SNORA66
GALNT5	Polypeptide N-Acetylgalactosaminyltransferase 5	Protein Coding	Q7Z7M9	44	GC02P157258	4.74352	https://www.genecards.org/cgi-bin/carddisp.pl?gene=GALNT5
MPV17L	MPV17 Mitochondrial Inner Membrane Protein Like	Protein Coding	Q2QL34	43	GC16P096131	4.69275	https://www.genecards.org/cgi-bin/carddisp.pl?gene=MPV17L
CACNG3	Calcium Voltage-Gated Channel Auxiliary Subunit Gamma 3	Protein Coding	O60359	50	GC16P096407	4.68988	https://www.genecards.org/cgi-bin/carddisp.pl?gene=CACNG3
SNORD13	Small Nucleolar RNA, C/D Box 13	RNA Gene		18	GC08P033514	4.66158	https://www.genecards.org/cgi-bin/carddisp.pl?gene=SNORD13
TRP-TGG3-1	TRNA-Pro (Anticodon TGG) 3-1	RNA Gene		11	GC05M182713	4.6426	https://www.genecards.org/cgi-bin/carddisp.pl?gene=TRP-TGG3-1
XXYLT1	Xyloside Xylosyltransferase 1	Protein Coding	Q8NBI6	46	GC03M195068	4.62888	https://www.genecards.org/cgi-bin/carddisp.pl?gene=XXYLT1
RGS3	Regulator Of G Protein Signaling 3	Protein Coding	P49796	46	GC09P126489	4.62392	https://www.genecards.org/cgi-bin/carddisp.pl?gene=RGS3
BARX2	BARX Homeobox 2	Protein Coding	Q9UMQ3	41	GC11P129375	4.56806	https://www.genecards.org/cgi-bin/carddisp.pl?gene=BARX2
GUCY1B2	Guanylate Cyclase 1 Soluble Subunit Beta 2 (Pseudogene)	Pseudogene	O75343	37	GC13M050994	4.47211	https://www.genecards.org/cgi-bin/carddisp.pl?gene=GUCY1B2
GUCA2A	Guanylate Cyclase Activator 2A	Protein Coding	Q02747	48	GC01M042162	4.39284	https://www.genecards.org/cgi-bin/carddisp.pl?gene=GUCA2A
EXD2	Exonuclease 3'-5' Domain Containing 2	Protein Coding	Q9NVH0	39	GC14P069191	4.38207	https://www.genecards.org/cgi-bin/carddisp.pl?gene=EXD2
TRK-TTT3-5	TRNA-Lys (Anticodon TTT) 3-5	RNA Gene		14	GC17P121946	4.35237	https://www.genecards.org/cgi-bin/carddisp.pl?gene=TRK-TTT3-5
MIR4300HG	MIR4300 Host Gene	RNA Gene		14	GC11M131265	4.33689	https://www.genecards.org/cgi-bin/carddisp.pl?gene=MIR4300HG
PPEF2	Protein Phosphatase With EF-Hand Domain 2	Protein Coding	O14830	43	GC04M075859	4.32503	https://www.genecards.org/cgi-bin/carddisp.pl?gene=PPEF2
SLIRP	SRA Stem-Loop Interacting RNA Binding Protein	Protein Coding	Q9GZT3	48	GC14P077708	4.27543	https://www.genecards.org/cgi-bin/carddisp.pl?gene=SLIRP
SLC24A3	Solute Carrier Family 24 Member 3	Protein Coding	Q9HC58	49	GC20P019212	4.25061	https://www.genecards.org/cgi-bin/carddisp.pl?gene=SLC24A3
GKN1	Gastrokine 1	Protein Coding	Q9NS71	50	GC02P068974	4.23153	https://www.genecards.org/cgi-bin/carddisp.pl?gene=GKN1
HCAR3	Hydroxycarboxylic Acid Receptor 3	Protein Coding	P49019	42	GC12M122714	4.22918	https://www.genecards.org/cgi-bin/carddisp.pl?gene=HCAR3
DHX32	DEAH-Box Helicase 32 (Putative)	Protein Coding	Q7L7V1	47	GC10M125836	4.13818	https://www.genecards.org/cgi-bin/carddisp.pl?gene=DHX32
OMP	Olfactory Marker Protein	Protein Coding	P47874	46	GC11P077102	4.10477	https://www.genecards.org/cgi-bin/carddisp.pl?gene=OMP
SCARNA14	Small Cajal Body-Specific RNA 14	RNA Gene		19	GC15M066347	4.08328	https://www.genecards.org/cgi-bin/carddisp.pl?gene=SCARNA14
OCM2	Oncomodulin 2	Protein Coding	P0CE71	39	GC07M097984	4.04542	https://www.genecards.org/cgi-bin/carddisp.pl?gene=OCM2
MCMBP	Minichromosome Maintenance Complex Binding Protein	Protein Coding	Q9BTE3	41	GC10M119829	4.01815	https://www.genecards.org/cgi-bin/carddisp.pl?gene=MCMBP
SNORD30	Small Nucleolar RNA, C/D Box 30	RNA Gene		21	GC11M128870	4.00809	https://www.genecards.org/cgi-bin/carddisp.pl?gene=SNORD30
SLC41A2	Solute Carrier Family 41 Member 2	Protein Coding	Q96JW4	44	GC12M104802	3.95501	https://www.genecards.org/cgi-bin/carddisp.pl?gene=SLC41A2
SNORD74	Small Nucleolar RNA, C/D Box 74	RNA Gene		16	GC01M174986	3.92706	https://www.genecards.org/cgi-bin/carddisp.pl?gene=SNORD74
SRL	Sarcalumenin	Protein Coding	Q86TD4	47	GC16M004189	3.9108	https://www.genecards.org/cgi-bin/carddisp.pl?gene=SRL
NRM	Nurim	Protein Coding	Q8IXM6	43	GC06M097025	3.88754	https://www.genecards.org/cgi-bin/carddisp.pl?gene=NRM
SNORD25	Small Nucleolar RNA, C/D Box 25	RNA Gene		20	GC11M128872	3.87759	https://www.genecards.org/cgi-bin/carddisp.pl?gene=SNORD25
FIBIN	Fin Bud Initiation Factor Homolog	Protein Coding	Q8TAL6	40	GC11P026994	3.85625	https://www.genecards.org/cgi-bin/carddisp.pl?gene=FIBIN
TREX2	Three Prime Repair Exonuclease 2	Protein Coding	Q9BQ50	42	GC0XM153444	3.79945	https://www.genecards.org/cgi-bin/carddisp.pl?gene=TREX2
MIR4306	MicroRNA 4306	RNA Gene		13	GC13P099643	3.79517	https://www.genecards.org/cgi-bin/carddisp.pl?gene=MIR4306
MAP4K1	Mitogen-Activated Protein Kinase Kinase Kinase Kinase 1	Protein Coding	Q92918	55	GC19M038587	3.7426	https://www.genecards.org/cgi-bin/carddisp.pl?gene=MAP4K1
SNORD47	Small Nucleolar RNA, C/D Box 47	RNA Gene		17	GC01M174988	3.70275	https://www.genecards.org/cgi-bin/carddisp.pl?gene=SNORD47
METAP1	Methionyl Aminopeptidase 1	Protein Coding	P53582	50	GC04P098995	3.67898	https://www.genecards.org/cgi-bin/carddisp.pl?gene=METAP1
RBM4B	RNA Binding Motif Protein 4B	Protein Coding	Q9BQ04	42	GC11M066664	3.64407	https://www.genecards.org/cgi-bin/carddisp.pl?gene=RBM4B
TRT-TGT6-1	TRNA-Thr (Anticodon TGT) 6-1	RNA Gene		12	GC05M181191	3.61054	https://www.genecards.org/cgi-bin/carddisp.pl?gene=TRT-TGT6-1
CHRM5	Cholinergic Receptor Muscarinic 5	Protein Coding	P08912	49	GC15P033968	3.54667	https://www.genecards.org/cgi-bin/carddisp.pl?gene=CHRM5
SNORA4	Small Nucleolar RNA, H/ACA Box 4	RNA Gene		19	GC03P187779	3.45325	https://www.genecards.org/cgi-bin/carddisp.pl?gene=SNORA4
MIR4300	MicroRNA 4300	RNA Gene		18	GC11M081890	3.4463	https://www.genecards.org/cgi-bin/carddisp.pl?gene=MIR4300
SLC24A2	Solute Carrier Family 24 Member 2	Protein Coding	Q9UI40	47	GC09M019507	3.35119	https://www.genecards.org/cgi-bin/carddisp.pl?gene=SLC24A2
DYNLRB2	Dynein Light Chain Roadblock-Type 2	Protein Coding	Q8TF09	47	GC16P080540	3.29153	https://www.genecards.org/cgi-bin/carddisp.pl?gene=DYNLRB2
LINC01228	Long Intergenic Non-Protein Coding RNA 1228	RNA Gene		13	GC16M079798	3.23634	https://www.genecards.org/cgi-bin/carddisp.pl?gene=LINC01228
SLC7A4	Solute Carrier Family 7 Member 4	Protein Coding	O43246	46	GC22M021028	3.19106	https://www.genecards.org/cgi-bin/carddisp.pl?gene=SLC7A4
SNORD49A	Small Nucleolar RNA, C/D Box 49A	RNA Gene		15	GC17P016440	3.16745	https://www.genecards.org/cgi-bin/carddisp.pl?gene=SNORD49A
SNORA8	Small Nucleolar RNA, H/ACA Box 8	RNA Gene		17	GC11M129600	3.13894	https://www.genecards.org/cgi-bin/carddisp.pl?gene=SNORA8
SNORD139	Small Nucleolar RNA, C/D Box 139	RNA Gene		12	GC22M081065	3.13819	https://www.genecards.org/cgi-bin/carddisp.pl?gene=SNORD139
LINC00578	Long Intergenic Non-Protein Coding RNA 578	RNA Gene		17	GC03P177441	3.13449	https://www.genecards.org/cgi-bin/carddisp.pl?gene=LINC00578
LCMT1	Leucine Carboxyl Methyltransferase 1	Protein Coding	Q9UIC8	41	GC16P096434	3.08963	https://www.genecards.org/cgi-bin/carddisp.pl?gene=LCMT1
SNORD55	Small Nucleolar RNA, C/D Box 55	RNA Gene		20	GC01P055452	3.04244	https://www.genecards.org/cgi-bin/carddisp.pl?gene=SNORD55
TRIM45	Tripartite Motif Containing 45	Protein Coding	Q9H8W5	40	GC01M117111	3.04193	https://www.genecards.org/cgi-bin/carddisp.pl?gene=TRIM45
SBSN	Suprabasin	Protein Coding	Q6UWP8	41	GC19M099738	2.90967	https://www.genecards.org/cgi-bin/carddisp.pl?gene=SBSN
SLC31A2	Solute Carrier Family 31 Member 2	Protein Coding	O15432	40	GC09P113150	2.88011	https://www.genecards.org/cgi-bin/carddisp.pl?gene=SLC31A2
HVCN1	Hydrogen Voltage Gated Channel 1	Protein Coding	Q96D96	47	GC12M110627	2.87114	https://www.genecards.org/cgi-bin/carddisp.pl?gene=HVCN1
C9orf85	Chromosome 9 Open Reading Frame 85	Protein Coding	Q96MD7	38	GC09P071911	2.8651	https://www.genecards.org/cgi-bin/carddisp.pl?gene=C9orf85
SNORA75	Small Nucleolar RNA, H/ACA Box 75	RNA Gene		19	GC02M231455	2.79919	https://www.genecards.org/cgi-bin/carddisp.pl?gene=SNORA75
KLHL26	Kelch Like Family Member 26	Protein Coding	Q53HC5	45	GC19P122630	2.75263	https://www.genecards.org/cgi-bin/carddisp.pl?gene=KLHL26
SLC39A9	Solute Carrier Family 39 Member 9	Protein Coding	Q9NUM3	45	GC14P069398	2.66519	https://www.genecards.org/cgi-bin/carddisp.pl?gene=SLC39A9
SNORD41	Small Nucleolar RNA, C/D Box 41	RNA Gene		18	GC19M012706	2.54245	https://www.genecards.org/cgi-bin/carddisp.pl?gene=SNORD41
A3GALT2	Alpha 1,3-Galactosyltransferase 2	Protein Coding	U3KPV4	31	GC01M033306	2.52098	https://www.genecards.org/cgi-bin/carddisp.pl?gene=A3GALT2
HDDC3	HD Domain Containing 3	Protein Coding	Q8N4P3	38	GC15M090929	2.49368	https://www.genecards.org/cgi-bin/carddisp.pl?gene=HDDC3
SNORA57	Small Nucleolar RNA, H/ACA Box 57	RNA Gene		19	GC11P094344	2.46843	https://www.genecards.org/cgi-bin/carddisp.pl?gene=SNORA57
APBB1IP	Amyloid Beta Precursor Protein Binding Family B Member 1 Interacting Protein	Protein Coding	Q7Z5R6	50	GC10P026444	2.46355	https://www.genecards.org/cgi-bin/carddisp.pl?gene=APBB1IP
SNORD37	Small Nucleolar RNA, C/D Box 37	RNA Gene		16	GC19M003982	2.32393	https://www.genecards.org/cgi-bin/carddisp.pl?gene=SNORD37
TRK-CTT2-3	TRNA-Lys (Anticodon CTT) 2-3	RNA Gene		10	GC05M182724	2.30495	https://www.genecards.org/cgi-bin/carddisp.pl?gene=TRK-CTT2-3
CXorf38	Chromosome X Open Reading Frame 38	Protein Coding	Q8TB03	39	GC0XM040626	2.28818	https://www.genecards.org/cgi-bin/carddisp.pl?gene=CXorf38
CHAD	Chondroadherin	Protein Coding	O15335	45	GC17M050464	2.2524	https://www.genecards.org/cgi-bin/carddisp.pl?gene=CHAD
SNORD94	Small Nucleolar RNA, C/D Box 94	RNA Gene		21	GC02P086707	2.15083	https://www.genecards.org/cgi-bin/carddisp.pl?gene=SNORD94
SNORD42A	Small Nucleolar RNA, C/D Box 42A	RNA Gene		21	GC17P028723	2.12202	https://www.genecards.org/cgi-bin/carddisp.pl?gene=SNORD42A
SNORD52	Small Nucleolar RNA, C/D Box 52	RNA Gene		18	GC06P144784	2.1187	https://www.genecards.org/cgi-bin/carddisp.pl?gene=SNORD52
SNORA9	Small Nucleolar RNA, H/ACA Box 9	RNA Gene		16	GC07M044985	2.06887	https://www.genecards.org/cgi-bin/carddisp.pl?gene=SNORA9
MIR4661	MicroRNA 4661	RNA Gene		16	GC08P091205	1.94898	https://www.genecards.org/cgi-bin/carddisp.pl?gene=MIR4661
SNORA68	Small Nucleolar RNA, H/ACA Box 68	RNA Gene		19	GC19P122614	1.41802	https://www.genecards.org/cgi-bin/carddisp.pl?gene=SNORA68
TRPC2	Transient Receptor Potential Cation Channel Subfamily C Member 2 (Pseudogene)	Pseudogene		20	GC11P003616	1.37194	https://www.genecards.org/cgi-bin/carddisp.pl?gene=TRPC2
